# Supplementary material for: Factors associated with high levels of glycated haemoglobin in patients with type 1 diabetes: a multicentre study in Brazil
Source: PubMed Central journal article supplement — BMJ Open. 2017 Dec 14;7(12):e018094. doi: 10.1136/bmjopen-2017-018094 (PMC5736030; doi:10.1136/bmjopen-2017-018094), 2017-12-14
Supplement: bmjopen-2017-018094.draft_revisions.pdf [file bmjopen-2017-018094.draft_revisions.pdf]

# BMJ Open

BMJ Open is committed to open peer review. As part of this commitment we make the peer review history of every article we publish publicly available.

When an article is published we post the peer reviewers' comments and the authors' responses online. We also post the versions of the paper that were used during peer review. These are the versions that the peer review comments apply to.

The versions of the paper that follow are the versions that were submitted during the peer review process. They are not the versions of record or the final published versions. They should not be cited or distributed as the published version of this manuscript.

BMJ Open is an open access journal and the full, final, typeset and author-corrected version of record of the manuscript is available on our site with no access controls, subscription charges or pay-per-view fees (<http://bmjopen.bmj.com>).

If you have any questions on BMJ Open's open peer review process please email [editorial.bmjopen@bmj.com](mailto:editorial.bmjopen@bmj.com)

# BMJ Open

## FACTORS ASSOCIATED WITH HIGH LEVELS OF GLYCATED HEMOGLOBIN IN PATIENTS WITH TYPE 1 DIABETES: A MULTICENTRIC STUDY IN BRAZIL

|                                    |                                                                                                                                                                                                                                                                                                                                                                                                                                                                                                                        |
|------------------------------------|------------------------------------------------------------------------------------------------------------------------------------------------------------------------------------------------------------------------------------------------------------------------------------------------------------------------------------------------------------------------------------------------------------------------------------------------------------------------------------------------------------------------|
| Journal:                           | <i>BMJ Open</i>                                                                                                                                                                                                                                                                                                                                                                                                                                                                                                        |
| Manuscript ID                      | bmjopen-2017-018094                                                                                                                                                                                                                                                                                                                                                                                                                                                                                                    |
| Article Type:                      | Research                                                                                                                                                                                                                                                                                                                                                                                                                                                                                                               |
| Date Submitted by the Author:      | 06-Jun-2017                                                                                                                                                                                                                                                                                                                                                                                                                                                                                                            |
| Complete List of Authors:          | ANDRADE, CARINE; Universidade Federal da Bahia, Escola de Nutrição<br>RIBEIRO, GUILHERME; Universidade Federal da Bahia, Institute of<br>Collective Health; Oswaldo Cruz Foundation, Gonçalo Moniz Institute<br>SANTOS, CARLOS ANTONIO; Universidade Estadual de Feira de Santana;<br>Fundacao Oswaldo Cruz, Gonçalo Moniz Institute<br>NEVES, RAIMUNDO CELESTINO; Fundacao Oswaldo Cruz, Gonçalo Moniz<br>Institute<br>MOREIRA JR, EDSON; Fundacao Oswaldo Cruz, Gonçalo Moniz Institute;<br>Obras Sociais Irma Dulce |
| <b>Primary Subject<br>Heading</b>: | Diabetes and endocrinology                                                                                                                                                                                                                                                                                                                                                                                                                                                                                             |
| Secondary Subject Heading:         | Epidemiology                                                                                                                                                                                                                                                                                                                                                                                                                                                                                                           |
| Keywords:                          | type 1 diabetes, glycemic control, glycated hemoglobin, Epidemiology <<br>TROPICAL MEDICINE                                                                                                                                                                                                                                                                                                                                                                                                                            |
|                                    |                                                                                                                                                                                                                                                                                                                                                                                                                                                                                                                        |

SCHOLARONE™  
Manuscripts

only

1  
2  
3  
4 **FACTORS ASSOCIATED WITH HIGH LEVELS OF GLYCATED HEMOGLOBIN IN**  
5  
6 **PATIENTS WITH TYPE 1 DIABETES: A MULTICENTRIC STUDY IN BRAZIL**  
7  
8  
9

10  
11  
12  
13  
14 Carine Sousa Andrade, PhD<sup>a,b</sup>, Guilherme Sousa Ribeiro, PhD<sup>a,c</sup>, Carlos Antonio Souza  
15  
16 Teles Santos, PhD<sup>a,d</sup>, Raimundo Celestino Silva Neves, PhD<sup>a</sup>, Edson Duarte Moreira  
17  
18 Jr., PhD<sup>a,e\*</sup>.  
19  
20

21  
22  
23  
24  
25  
26 (a) Gonçalo Moniz Institute, Oswaldo Cruz Foundation, Salvador, Brazil;

27  
28 (b) School of Nutrition, Federal University of Bahia, Salvador, Brazil;

29  
30 (c) Institute of Collective Health, Federal University of Bahia, Salvador, Brazil;

31  
32 (d) State University of Feira de Santana, Feira de Santana, Brazil;

33  
34 (e) Charitable Works Foundation of Sister Dulce, Salvador, Brazil.  
35  
36  
37  
38

39  
40 \*Address for correspondence: Dr. Edson D Moreira Jr.

41  
42 Centro de Pesquisa Gonçalo Moniz, Fundação Oswaldo Cruz, Rua Waldemar Falcão  
43  
44 121, Salvador, Bahia, 40296-710, Brazil.  
45

46  
47 Tel .: +55 71 3176 2343; Fax: +55 71 3176 2243.

48  
49 E-mail: edson@bahia.fiocruz.br (E. D. Moreira Jr.).  
50  
51  
52

53  
54 Word count: 3,093 words  
55  
56  
57  
58  
59  
60

**ABSTRACT**

Objective: Long-term complications of type 1 diabetes mellitus (DM1) can be prevented with adequate glycemic control. However, high levels of glycosylated hemoglobin (HbA1c) occur in 60 to 90% of the DM1 patients. Thus, we aimed to investigate the role of sociodemographic, behavioral and clinical factors on the HbA1c levels of DM1 patients in Brazil.

Design, setting and participants: A cross-sectional study was conducted with ambulatory DM1 patients aged  $\geq 18$  years from 10 Brazilian cities. Sociodemographic, behavioral and clinical data were obtained through interviews.

Main outcome measures: HbA1c level was measured by liquid chromatography.

Hierarchical multiple variable linear regression models were used to identify factors correlated with high levels of HbA1c.

Results: Of 979 DM1 patients, 63.8% were female and the mean age was 40 (SD: 14.6) years. The mean HbA1c level was 9.4% (SD: 2.2%), and 89.6% of the patients had HbA1c  $\geq 7.0\%$ . Factors independently correlated with increased HbA1c levels included: lower education, non-participation in diabetes classes/lecture during the year before, having a self-perception of poor adherence to diet and insulin, not having private medical care, and not measuring the HbA1c levels in the prior year. Of note, poor adherence to diet and insulin were the independent factors most strongly associated with high levels of HbA1c (mean increment in HbA1c levels of 0.88% and 1.25%, respectively).

Conclusion: Poor glycemic control, which is common among DM1 Brazilian patients, is associated with sociodemographic, behavioral and clinical factors. Specific actions,

1  
2  
3  
4 particularly those targeting improving adherence to diet and insulin, may contribute to  
5  
6  
7 successful management of DM1 patients.  
8  
9

10  
11  
12 Keywords: type 1 diabetes, glycemic control, glycosylated hemoglobin, epidemiology.  
13

### 14 15 16 **Strengths and limitations of this study** 17

- 18  
19 • This cross-sectional, multicenter study included 979 type 1 diabetes mellitus  
20 patients from ten large Brazilian cities, representing four of the five regions of the  
21 country.  
22  
23
- 24  
25 • We measured the HbA1c levels for all participants in a single laboratory, and  
26 used the same reference method of liquid chromatography, thus avoiding  
27 problems with lack of standardization reported by other authors.  
28  
29
- 30  
31 • In order to identify independent factors associated with increased levels of  
32 HbA1c, we applied robust, multiple variable models, using a hierarchical  
33 approach according to a previously defined conceptual framework. This method  
34 accounts for hierarchical inter-relationships between variables and for the  
35 potential underestimation of the effects of distal determinants.  
36  
37
- 38  
39 • Data on behavioral and clinical characteristics were collected through interviews,  
40 potentially introducing a certain degree of inaccuracy for some answers.  
41  
42  
43  
44  
45  
46  
47  
48  
49  
50  
51  
52  
53  
54  
55  
56  
57  
58  
59  
60

## 1. INTRODUCTION

Type 1 diabetes mellitus (DM1) is characterized by the destruction of the insulin-producing pancreatic  $\beta$  cells, leading to an hyperglycemic state that requires continued reposition of exogenous insulin in order to prevent life-threatening acute and chronic complications[1]. The disease annual incidence varies greatly between countries, ranging from 1.1 to 39.9 per 100,000 persons 15-19 years of age[2], and is globally increasing at a rate of approximately 3% per year[3].

Patients with DM1 are at increased risk for cardiovascular disease, periphery nerve damage, nephropathy, and retinopathy, resulting in reduced life expectancy for those who are not properly treated[1]. This risk can be substantially reduced with intensive glycemic control, aiming glycated hemoglobin (HbA1c) levels <6.0%[4]. However, most patients with DM1 have HbA1c values above the international recommendation of <7.0%[5]. Inadequate glycemic control (HbA1c levels >7.0% in DM1 patients was observed in 77% of the participants of a study in the United States in 2016[6], in 74% of the study patients in the region of Castilla-La Mancha, Spain in 2012[7], and in 84%-90% of the participants of national multicenter studies conducted in Brazil in 2010 and 2015[8,9].

A better understanding of the factors that determine glycemic control is critical to improved management of DM1 patients. However, the majority of studies investigating determinants of glycemic control enrolled patients with type 2 diabetes mellitus (DM2) or studied patients with DM1 and DM2 combined, despite the fact that challenges to achieve glycemic control differ between patients with DM1 and DM2, mainly due to the compulsory need of insulin use in DM1 patients. In the few published reports on

1  
2  
3  
4 determinants of glycemic control in DM1 patients, high levels of HbA1c have been  
5 associated with younger age, low educational level, poor adherence to diet, mode of  
6 insulin administration, and infrequent monitoring of blood glucose[10–14]. Here, we  
7 describe the results of our study in which we investigated the role of sociodemographic,  
8 behavioral and clinical characteristics in the levels of HbA1c in a large sample of  
9 patients with DM1 in Brazil, a country where >31,000 persons <15 years of age have  
10 DM1[15].  
11  
12  
13  
14  
15  
16  
17  
18  
19  
20  
21  
22  
23  
24  
25

## 26 **2. SUBJECTS, MATERIAL AND METHODS**

### 27 **2.1. Study Design and Sample Selection:**

28  
29  
30 This cross-sectional, multicenter study was conducted in ten large Brazilian cities,  
31 representing four of the five regions of the country (Southeast region: Belo Horizonte,  
32 Campinas, Rio de Janeiro, and São Paulo; South region: Curitiba, and Porto Alegre;  
33 Midwest region: Brasilia; and Northeast region: Salvador, Fortaleza and Recife). These  
34 cities are the largest in their respective regions, and nine of them were ranked among  
35 the most populous municipalities in Brazil. To pursue the selection of the diabetes  
36 medical centers, we requested the Brazilian Diabetes Association to identify in each of  
37 the study city a list of candidate centers, selected because of previous experience in  
38 conducting epidemiological research and where a large number of adult patients are  
39 treated for diabetes (minimum of 300 patients per month). In each city, two diabetes  
40 centers (20 centers in total) were invited to participate in the study: five university-  
41  
42  
43  
44  
45  
46  
47  
48  
49  
50  
51  
52  
53  
54  
55  
56  
57  
58  
59  
60

1  
2  
3  
4 affiliated hospitals, eleven general public hospitals, and four not-for-profit private  
5  
6 hospitals. All invited centers accepted and were included in the study.  
7  
8

9 From February 2006 to March 2007, we invited patients fulfilling the eligibility  
10 criteria to participate in the study during 30 consecutive days in each of the centers. To  
11 be eligible for study enrollment, patients had to be  $\geq 18$  years of age and report a prior  
12 medical diagnosis of DM1. Patients who had participated in other research in the three  
13 months preceding the study were excluded. All patients were informed about the study  
14 aims, procedures and risks, and signed an informed consent prior to inclusion. A  
15 Research Ethics Committee from each of the selected cities approved the study.  
16  
17  
18  
19  
20  
21  
22  
23  
24

## 25 26 27 28 **2.2. Data Collection:** 29

30 Trained interviewers who were not part of the medical centers staff interviewed  
31 the participants using a structured and pre-tested questionnaire to obtain data on  
32 demographic and socioeconomic indicators, self-perception of diet and insulin treatment  
33 adherence, attendance to diabetes education lectures, participation in associations of  
34 patients with diabetes, and clinical characteristics. Data on education attainment  
35 (primary school or less, complete or incomplete secondary/high school, or at least some  
36 college level education) and on race/skin color were self-reported. Data on self-  
37 perception of diet adherence and of insulin adherence were collected using the following  
38 ordinal scale: poor/fair, good, or excellent. Clinical data included time since first  
39 diagnosis of diabetes, number of insulin doses per day, frequency of self-monitoring of  
40 blood glucose, as well as frequencies, in the previous 12 months, of consultation in  
41 public and private medical service facilities, consultation with an endocrinologist, prior  
42  
43  
44  
45  
46  
47  
48  
49  
50  
51  
52  
53  
54  
55  
56  
57  
58  
59  
60



1  
2  
3  
4 hypoglycemic episodes, prior hospitalizations due to ketoacidosis and HbA1c  
5  
6 measurements. Interviews were conducted in a private room and lasted 20-25 minutes.  
7  
8  
9 The response rate was 84% (ranging from 78% to 95%).  
10

### 11 12 13 14 **2.3. Measurement of Glycated Hemoglobin (HbA1c):** 15

16 A blood sample was collected from participants at enrollment and tested by  
17  
18 automated high performance liquid chromatography to determine HbA1c levels. All  
19  
20 exams were performed in the same laboratory, according to standard procedures. The  
21  
22 HbA1c levels data were reported as mean and standard deviation (SD) and,  
23  
24 categorically, as a frequency of <7.0%, 7.0-8.9%, 9.0-10.9%, or  $\geq 11.0\%$ . We considered  
25  
26 glycemic control to be inadequate when the HbA1c concentration was  $\geq 7.0\%$ [5].  
27  
28  
29  
30  
31  
32

### 33 **2.4. Statistical Analysis:** 34

35 Data were double entered into a computerized database using the EPI INFO  
36  
37 version 3.04 software system (Centers for Disease Control and Prevention, Atlanta,  
38  
39 USA). Subsequently, the two databases were electronic compared to validate the  
40  
41 accuracy and internal consistency of the data. Statistical analyses were performed using  
42  
43 version 12 of STATA (StataCorp., College Station, USA).  
44  
45  
46

47 Participants' characteristics were presented using means and standard deviation  
48  
49 for continuous variables, and frequencies for categorical variables. We applied bivariate  
50  
51 and multiple variables linear regression models to estimate the effect of the independent  
52  
53 variables on the level of HbA1c. Variables with a significant association at p value of  
54  
55  $\leq 0.20$  in the bivariate analyses were included in robust, multiple variable models using a  
56  
57  
58  
59  
60

1  
2  
3  
4 hierarchical approach according to a previously defined conceptual framework that  
5 accounted for hierarchical inter-relationships between variables and for the potential  
6 underestimation of the effects of distal determinants.  
7  
8  
9

10  
11 The hierarchical model grouped variables in three blocks (Figure 1). Block 1  
12 contained socioeconomic variables, such as education level and race/skin color. Block 2  
13 contained behavioral variables, such as attendance to diabetes class/lectures,  
14 participation in associations of patients with diabetes, and self-perception of adherence  
15 to diet and insulin treatment. Block 3 comprised of clinical characteristics, including time  
16 since first diagnosis of diabetes, number of insulin doses per day, and frequency of self-  
17 monitoring of blood glucose, consultation with an endocrinologist, and HbA1c  
18 measurement in the previous 12 months (Figure 1).  
19  
20  
21  
22  
23  
24  
25  
26  
27  
28  
29

30 A backward elimination strategy was then performed for each block. Block 1  
31 variables that were significantly correlated with HbA1c serum levels at a  $p$  value  $\leq 0.05$   
32 were maintained in the subsequent backward elimination model with block 2 variables.  
33 Using the same approach, block 2 variables that were significantly correlated with  
34 HbA1c serum levels at a  $p$  value  $\leq 0.05$  were maintained in the subsequent backward  
35 elimination model with block 3 variables. Finally, block 3 variables with a  $p$  value  $\leq 0.05$   
36 were defined as factors independently correlated with the HbA1c levels. Variables from  
37 block 1 and block 2 that were selected to be included in following models were  
38 considered to be significantly correlated with HbA1c levels, regardless of their  $p$  value in  
39 the subsequent models. Sex and age were included in all models to ensure adjustments  
40 to these factors at all stages of the multiple variable analyses. We used the Akaike  
41  
42  
43  
44  
45  
46  
47  
48  
49  
50  
51  
52  
53  
54  
55  
56  
57  
58  
59  
60

1  
2  
3  
4 Information Criterion (AIC) to estimate the goodness of fit of the successive adjusted  
5  
6 models.  
7  
8  
9

### 10 11 **3. RESULTS** 12

13  
14 Of the 979 DM1 patients enrolled in the study, 625 (63.8%) were female, and 296  
15 (30.2%) were 18-29 years of age, 412 (42.1%) 30-49 years of age, and 271 (27.7%) ≥50  
16 years of age (Table 1). About half (488, 49.8%) of the patients self-referred to be white,  
17 and 398 (40.8%) had not studied beyond the primary school level. The Southeast region  
18 of Brazil accounted for 611 (62.4%) participants. Although all the diabetes centers were  
19 affiliated with the Brazilian public health care system, 95 (9.7%) of the patients reported  
20 they had also received private assistance during the past 12 months.  
21  
22  
23  
24  
25  
26  
27  
28  
29  
30  
31  
32  
33  
34  
35  
36  
37  
38  
39  
40  
41  
42  
43  
44  
45  
46  
47  
48  
49  
50  
51  
52  
53  
54  
55  
56  
57  
58  
59  
60

TABLE 1. Sociodemographic and clinical characteristics of 979 Brazilian patients with type 1 diabetes, Brazil.

| Characteristics                                   | n (%)      |
|---------------------------------------------------|------------|
| <b>SOCIODEMOGRAPHICS</b>                          |            |
| Age (years)                                       |            |
| 18 – 29                                           | 296 (30.2) |
| 30 – 49                                           | 412 (42.1) |
| ≥ 50                                              | 271 (27.7) |
| Sex Female                                        | 625 (63.8) |
| Racial/Ethnic                                     |            |
| White                                             | 488 (49.8) |
| Mixed                                             | 286 (29.2) |
| Black                                             | 122 (12.5) |
| Other                                             | 83 (8.5)   |
| Education <sup>1</sup>                            |            |
| At least some College                             | 154 (15.8) |
| Secondary/High school                             | 424 (43.4) |
| Primary school or less                            | 398 (40.8) |
| Brazilian Region                                  |            |
| Southeast                                         | 611 (62.4) |
| Northeast                                         | 174 (17.8) |
| South                                             | 104 (10.6) |
| Center-west                                       | 90 (9.2)   |
| Type of service for medical care in the last year |            |
| Public                                            | 884 (90.3) |
| Private                                           | 95 (9.7)   |
| <b>CLINICAL COMPLICATIONS</b>                     |            |
| Hypoglycemic episodes in the last year            | 497 (50.8) |
| Ketoacidosis hospitalization in the last year     | 248 (25.3) |
| Reported complications                            |            |
| Retinopathy                                       | 427 (43.6) |
| Neuropathy <sup>2</sup>                           | 381 (39.2) |
| Nephropathy                                       | 207 (21.1) |
| Angina <sup>3</sup>                               | 129 (13.2) |
| Vasculopathy <sup>3</sup>                         | 125 (12.8) |
| <b>LABORATORY</b>                                 |            |
| Glycated Hemoglobin (HbA1c) (%)                   |            |
| <7.0                                              | 102 (10.4) |
| 7.0 – 8.9                                         | 366 (37.4) |
| 9.0 – 10.9                                        | 287 (29.3) |
| >11.0                                             | 224 (22.9) |

<sup>1</sup> Data available for 976 patients

<sup>2</sup> Data available for 973 patients

<sup>3</sup> Data available for 977 patients

1  
2  
3  
4  
5 The diabetes complications most frequently reported by the study participants  
6 were retinopathy (427, 43.6%), followed by neuropathy (381, 39.2%) and nephropathy  
7 (207, 21.1%). Episodes of ketoacidosis and hypoglycemia in the previous year were  
8 common, affecting 248 (25.3%) and 497 (50.8%) patients, respectively. The majority  
9 (887, 89.6%) of patients had inadequate glycemic control (HbA1c  $\geq$ 7.0%), and the mean  
10 HbA1c level was 9.4% (SD: 2.2%).  
11  
12  
13  
14  
15  
16  
17  
18

19 Bivariate analysis pointed to a correlation of higher levels of HbA1c with black  
20 race, lower education attainment, self-perception of fair/poor adherence to diet and to  
21 insulin treatment, not participating in diabetes class/lectures during the previous year,  
22 and never having participated in associations of patients with diabetes (Table 2). In  
23 addition, patients who reported that in the previous year had neither regular medical  
24 appointments, nor consultations with an endocrinologist, private consultations or health  
25 care delivered in the same diabetes center had significantly higher HbA1c. Finally,  
26 patients not performing regular self-monitoring of blood glucose, those with no measure  
27 of HbA1c during the previous year, and patients receiving less than four doses of insulin  
28 per day also had higher levels of HbA1c.  
29  
30  
31  
32  
33  
34  
35  
36  
37  
38  
39  
40  
41  
42  
43  
44  
45  
46  
47  
48  
49  
50  
51  
52  
53  
54  
55  
56  
57  
58  
59  
60

TABLE 2. Factors associated with glycated hemoglobin (HbA1c) levels in Brazilian patients with type 1 diabetes.

| Independent variable                                   | N° participants | HbA1c means in %<br>(SD) | $\beta$ Coefficient (CI 95%) | p value |
|--------------------------------------------------------|-----------------|--------------------------|------------------------------|---------|
| <b>BLOCK 1 – SOCIODEMOGRAPHIC</b>                      |                 |                          |                              |         |
| Age (years)                                            |                 |                          |                              |         |
| 18 – 29                                                | 296             | 9.35 (2.36)              | Ref                          |         |
| 30 – 49                                                | 412             | 9.54 (2.28)              | 0.186 (-0.146; 0.517)        | 0.273   |
| ≥ 50                                                   | 271             | 9.24 (1.95)              | -0.118 (-0.484; 0.248)       | 0.527   |
| Sex                                                    |                 |                          |                              |         |
| Male                                                   | 354             | 9.25 (2.08)              | Ref                          |         |
| Female                                                 | 625             | 9.48 (2.29)              | 0.229 (-0.061; 0.518)        | 0.122   |
| Racial/Ethnic                                          |                 |                          |                              |         |
| White                                                  | 488             | 9.26 (2.10)              | Ref                          |         |
| Mixed                                                  | 286             | 9.32 (2.33)              | 0.133 (-0.191; 0.456)        | 0.421   |
| Black                                                  | 122             | 9.84 (2.34)              | 0.576 (0.136; 1.017)         | 0.010   |
| Other                                                  | 83              | 9.62 (2.31)              | 0.361 (-0.155; 0.877)        | 0.170   |
| Education                                              |                 |                          |                              |         |
| At least some College                                  | 154             | 9.13 (1.82)              | Ref                          |         |
| Secondary/High school                                  | 424             | 9.21 (2.15)              | 0.084 (-0.325; 0.492)        | 0.688   |
| Primary school or less                                 | 398             | 9.70 (2.40)              | 0.565 (0.154; 0.977)         | 0.007   |
| <b>BLOCK 2 – BEHAVIORAL</b>                            |                 |                          |                              |         |
| Self-perception of adherence to diet                   |                 |                          |                              |         |
| Excellent                                              | 129             | 8.79 (2.22)              | Ref                          |         |
| Good                                                   | 327             | 9.13 (2.09)              | 0.344 (-0.103; 0.792)        | 0.131   |
| Fair / Poor                                            | 523             | 9.72 (2.25)              | 0.931 (0.508; 1.354)         | <0.001  |
| Self-perception of adherence to insulin                |                 |                          |                              |         |
| Excellent                                              | 750             | 9.28 (2.12)              | Ref                          |         |
| Good                                                   | 144             | 9.59 (2.30)              | 0.315 (-0.074; 0.703)        | 0.112   |
| Fair / Poor                                            | 62              | 10.82 (2.49)             | 1.543 (0.978; 2.107)         | <0.001  |
| Participation in lecture for diabetes in the last year |                 |                          |                              |         |
| Yes                                                    | 345             | 9.11 (2.09)              | Ref                          |         |
| No                                                     | 540             | 9.67 (2.31)              | 0.549 (0.247; 0.850)         | <0.001  |
| Participation in association of diabetics patients     |                 |                          |                              |         |
| Yes, still participate                                 | 116             | 9.09 (1.88)              | Ref                          |         |
| Yes, but no more participate                           | 124             | 9.02 (1.80)              | -0.067 (-0.627; 0.492)       | 0.814   |
| No, I never participated                               | 713             | 9.51 (2.32)              | 0.418 (-0.016; 0.851)        | 0.059   |
| <b>BLOCK 3 – CLINICAL</b>                              |                 |                          |                              |         |
| Regular medical visit in the last year                 |                 |                          |                              |         |
| Yes                                                    | 878             | 9.34 (2.19)              | Ref                          |         |
| No                                                     | 101             | 9.89 (2.42)              | 0.541 (0.084; 0.998)         | 0.020   |
| Endocrinologist visit in the last year                 |                 |                          |                              |         |
| Yes                                                    | 800             | 9.32 (2.15)              | Ref                          |         |
| No                                                     | 177             | 9.77 (2.50)              | 0.453 (0.091; 0.814)         | 0.014   |

|    |                                                       |     |              |                        |        |
|----|-------------------------------------------------------|-----|--------------|------------------------|--------|
| 1  |                                                       |     |              |                        |        |
| 2  | Diabetes care in specialized service in the last year |     |              |                        |        |
| 3  | Yes                                                   | 661 | 9.32 (2.18)  | Ref                    |        |
| 4  | No                                                    | 318 | 9.56 (2.29)  | 0.236 (-0.061; 0.533)  | 0.120  |
| 5  | Diabetes care in private clinic in the last year      |     |              |                        |        |
| 6  | Yes                                                   | 95  | 8.87 (1.61)  | Ref                    |        |
| 7  | No                                                    | 884 | 9.46 (2.27)  | 0.586 (0.117; 1.055)   | 0.014  |
| 8  | Diabetes care in the same service                     |     |              |                        |        |
| 9  | Yes                                                   | 921 | 9.36 (2.18)  | Ref                    |        |
| 10 | No                                                    | 57  | 10.10 (2.64) | 0.735 (0.142; 1.328)   | 0.015  |
| 11 | Time since diabetes onset (years)                     |     |              |                        |        |
| 12 | < 10                                                  | 261 | 9.43 (2.66)  | Ref                    |        |
| 13 | 10 – 19                                               | 307 | 9.52 (2.11)  | 0.094 (-0.273; 0.460)  | 0.616  |
| 14 | ≥ 20                                                  | 408 | 9.27 (1.97)  | -0.115 (-0.497; 0.192) | 0.386  |
| 15 | Self-monitoring glucose                               |     |              |                        |        |
| 16 | Yes, regularly                                        | 663 | 9.25 (2.14)  | Ref                    |        |
| 17 | Yes, when decompensated                               | 160 | 9.72 (2.28)  | 0.463 (0.080; 0.845)   | 0.018  |
| 18 | No                                                    | 151 | 9.74 (2.46)  | 0.489 (0.097; 0.881)   | 0.015  |
| 19 | Number insulin doses per day                          |     |              |                        |        |
| 20 | 4 times                                               | 168 | 8.91 (1.97)  | Ref                    |        |
| 21 | 3 times                                               | 290 | 9.38 (2.10)  | 0.451 (0.002; 0.899)   | 0.049  |
| 22 | 2 times or less                                       | 505 | 9.61 (2.29)  | 0.712 (0.302; 1.121)   | 0.001  |
| 23 | Measurement HbA1c in the last year                    |     |              |                        |        |
| 24 | Yes                                                   | 533 | 9.10 (1.93)  | Ref                    |        |
| 25 | No                                                    | 184 | 10.00 (2.48) | 0.901 (0.576; 1.226)   | <0.001 |
| 26 | Do not know                                           | 261 | 9.40 (2.43)  | 0.298 (-0.070; 0.665)  | 0.112  |

Bivariate linear regression analyses.

1  
2  
3  
4  
5 The first multiple variable model, built with the socioeconomic variables (Model A,  
6  
7 Table 3), showed that for each one year rise in age, HbA1c level were reduced by  
8  
9 0.01% ( $\beta=-0.013$ , 95% CI: -0.025, -0.002) and that education level only up to primary  
10  
11 school was correlated with higher HbA1c levels ( $\beta=0.565$ , 95% CI: 0.154, 0.977). The  
12  
13 second multiple variable model, which combined the behavioral variables with the  
14  
15 selected variables from model A (Model B, Table 3), found that not participating in  
16  
17 diabetes class/lecture during the previous year ( $\beta=0.503$ , 95% CI: 0.208, 0.799) and a  
18  
19 self-perception of fair/poor adherence to diet ( $\beta=0.889$ , 95% CI: 0.446, 1.332) and to  
20  
21 insulin therapy ( $\beta=1.385$ , 95% CI: 0.764, 2.007) were also positively correlated with  
22  
23 HbA1c levels. The third multiple variable model, which incorporated the clinical variables  
24  
25 with those selected in model B (Model C, Table 3), found that not consulting at a private  
26  
27 clinic during the previous year ( $\beta=0.545$ , 95% CI: 0.021, 1.069) and having no HbA1c  
28  
29 measurement performed in the previous year ( $\beta=0.770$ , 95% CI: 0.418; 1.122) were  
30  
31 positively correlated with the HbA1c levels.  
32  
33  
34  
35  
36  
37  
38  
39  
40  
41  
42  
43  
44  
45  
46  
47  
48  
49  
50  
51  
52  
53  
54  
55  
56  
57  
58  
59  
60



TABLE 3. Hierarchical model of multiple linear regression analyses for determinants of inadequate glycemc control in 846 Brazilian patients with type 1 diabetes.

| Independent variable                                   | Unadjusted                   | Model A                      | Model B                      | Model C                      |
|--------------------------------------------------------|------------------------------|------------------------------|------------------------------|------------------------------|
|                                                        | $\beta$ coefficient (95% IC) |
| <b>BLOCK 1: SOCIODEMOGRAPHIC</b>                       |                              |                              |                              |                              |
| Age (years)                                            | -0.003 (-0.012; 0.007)       | -0.013 (-0.025; -0.002)      | -0.008 (-0.019; 0.002)       | -0.009 (-0.020; 0.001)       |
| Sex                                                    |                              |                              |                              |                              |
| Male                                                   | Ref                          | Ref                          | Ref                          | Ref                          |
| Female                                                 | 0.229 (-0.061; 0.518)        | 0.243 (-0.065; 0.551)        | 0.311 (0.012; 0.610)         | 0.286 (-0.009; 0.582)        |
| Education                                              |                              |                              |                              |                              |
| At least some College                                  | Ref                          | Ref                          | Ref                          | Ref                          |
| Secondary/High school                                  | 0.084 (-0.325; 0.492)        | 0.141 (-0.288; 0.572)        | 0.081 (-0.336; 0.499)        | -0.254 (-0.709; 0.199)       |
| Primary school or less                                 | 0.565 (0.154; 0.977)         | 0.765 (0.313; 1.217)         | 0.551 (0.106; 0.996)         | 0.090 (-0.409; 0.590)        |
| <b>BLOCK 2: BEHAVIORAL</b>                             |                              |                              |                              |                              |
| Self-perception of adherence to diet                   |                              |                              |                              |                              |
| Excellent                                              | Ref                          |                              | Ref                          | Ref                          |
| Good                                                   | 0.344 (-0.103; 0.792)        |                              | 0.401 (-0.062; 0.866)        | 0.377 (-0.081; 0.836)        |
| Fair / Poor                                            | 0.931 (0.508; 1.354)         |                              | 0.889 (0.446; 1.332)         | 0.876 (0.439; 1.313)         |
| Self-perception of adherence to insulin                |                              |                              |                              |                              |
| Excellent                                              | Ref                          |                              | Ref                          | Ref                          |
| Good                                                   | 0.315 (-0.074; 0.703)        |                              | 0.295 (-0.112; 0.702)        | 0.239 (-0.164; 0.642)        |
| Fair / Poor                                            | 1.543 (0.978; 2.107)         |                              | 1.385 (0.764; 2.007)         | 1.242 (0.625; 1.858)         |
| Participation in lecture for diabetes in the last year |                              |                              |                              |                              |
| Yes                                                    | Ref                          |                              | Ref                          | Ref                          |
| No                                                     | 0.549 (0.247; 0.850)         |                              | 0.503 (0.208; 0.799)         | 0.482 (0.184; 0.779)         |
| <b>BLOCK 3: CLINICAL</b>                               |                              |                              |                              |                              |
| Diabetes care in private clinic in the last year       |                              |                              |                              |                              |
| Yes                                                    | Ref                          |                              |                              | Ref                          |
| No                                                     | 0.586 (0.117; 1.055)         |                              |                              | 0.545 (0.021; 1.069)         |
| Measurement HbA1c in the last year                     |                              |                              |                              |                              |
| Yes                                                    | Ref                          |                              |                              | Ref                          |
| No                                                     | 0.901 (0.576; 1.226)         |                              |                              | 0.770 (0.418; 1.122)         |
| Do not know                                            | 0.298 (-0.070; 0.665)        |                              |                              | 0.243 (-0.170; 0.657)        |
| AIC*:                                                  | Not Applicable               | 3,735.893                    | 3,685.672                    | 3,666.879                    |

Note: The Model shows associations between sociodemographic factors (block 1) and the levels of glycated hemoglobin (HbA1c). Model B shows associations between sociodemographic factors and behavioral (blocks 1 and 2) and HbA1c levels. Model C shows associations between sociodemographic factors, behavioral and clinical (blocks 1, 2 and 3), and HbA1c levels. \*Akaike Information Criteria.

#### 4. DISCUSSION

Our results indicate that sociodemographic, behavioral and clinical factors in DM1 patients are independently associated with high levels of HbA1c. Of note, self-reported poor adherence to diet was strongly associated with elevated HbA1c levels. This finding is of special relevance because adherence to diet is a modifiable factor, possibly accomplished by specific actions targeting those noncompliant to dietary recommendations. In addition, we found that some of the socioeconomic factors influencing the inadequacy of glycemic control, such as low educational attainment, are mediated by behavioral and clinical aspects. These findings add valuable information for a better understanding of the barriers to achieve adequate glycemic control in adult patients with DM1.

The American Diabetes Association (ADA) recommends that patients with a recent diagnosis of diabetes and without major complications or prior history of severe hypoglycemic episodes should target HbA1c levels of <6.5%, while patients with advanced micro and macrovascular complications or comorbidities aim towards HbA1c levels of <8.0%[5]. This recommendation is supported by studies conducted over two decades ago, showing that poor glycemic control is associated with microvascular and macrovascular complications in patients with diabetes[4,5]. Despite that, the majority of DM1 patients worldwide have inadequate glycemic control[7,16,17]. In our study, we found that the mean HbA1c level was 9.4%, the same result observed in another multicenter, DM1 study, conducted in 20 Brazilian cities between 2008 and 2010[9]. This study also found that the quality of life of DM1 patients was inversely related to the levels of HbA1c.

1  
2  
3  
4  
5 In our multiple variable model including only the sociodemographic variables, we  
6  
7 found that patients with primary school or less had a mean level of HbA1c nearly 1%  
8  
9 greater than patients with at least some college level education. The relation between  
10  
11 lower educational attainment of DM1 patients and higher levels of HbA1c has been  
12  
13 previously reported[7,11]. However, a noteworthy finding of our study is that the  
14  
15 correlation coefficient between educational levels and HbA1c levels decreased after we  
16  
17 incorporated the behavioral variables (Model B) and almost disappeared when the  
18  
19 clinical factors were included (Model C). The differences observed in the education level  
20  
21 correlation coefficients among these models indicate that the effect of lower education  
22  
23 on the level of HbA1c is possibly mediated by behavioral and, especially, by clinical  
24  
25 factors.  
26  
27  
28  
29

30  
31 Regarding the behavioral factors, we found that participation in diabetes  
32  
33 education programs was associated with better glycemic control, consistent with  
34  
35 previous studies. In a case-control study conducted in Saudi Arabia, patients with DM1  
36  
37 or DM2 who had received monthly counseling about the disease, had significantly  
38  
39 reduced HbA1c levels compared to those who had received counseling only at the  
40  
41 beginning of the study[18]. In another single-arm, pre-post cohort study, aiming to  
42  
43 estimate the impact of improving the knowledge, skills and confidence in self-  
44  
45 management of DM1, the average HbA1c levels was significantly reduced from baseline  
46  
47 to follow-up measurements[19]. The mechanisms by which diabetes education programs  
48  
49 help achieve a better glycemic control are likely diverse, and may include provision of  
50  
51 knowledge about the disease, aid in developing skills and techniques for disease self-  
52  
53 management, and support for adoption of healthy eating and lifestyle habits.  
54  
55  
56  
57  
58  
59  
60

1  
2  
3  
4  
5 A lower degree of self-perceived adherence to diet and insulin therapy were also  
6  
7 strongly associated with higher levels of HbA1c among our study patients. These  
8  
9 findings are in accordance with other studies of DM1 patients, in which the average  
10  
11 HbA1c was significantly lower among patients who followed dietary recommendations,  
12  
13 compared to those who did not[13,20]. A study that enrolled both DM1 and DM2, insulin-  
14  
15 treated patients also found that better glycemic control was independently associated  
16  
17 with adherence to a dietary plan that included greater daily ingestion of fruits and  
18  
19 vegetables, but not with adherence to insulin therapy[16]. However, Gastal et al.[21]  
20  
21 found that better scores in a diabetes self-care scale evaluating diabetes general  
22  
23 management, diet, exercise, care with feet, glycemic monitoring, insulin administration,  
24  
25 and detection, prevention or treatment of hypoglycemia/hyperglycemia were associated  
26  
27 with lower HbA1c values. Thus, additional evidences support our findings that  
28  
29 adherence to both diet and insulin regimens are essential for glycemic control and for  
30  
31 subsequent prevention of disease complications and early death.  
32  
33  
34  
35  
36

37  
38 Unfortunately, we did not collect detailed data on diet and food consumption,  
39  
40 which would allow a better understanding of its role on glycemic control. Even though,  
41  
42 our finding of an inverse relation between the degree of self-perceived adherence to diet  
43  
44 and HbA1c levels suggests that following specific alimentary recommendations have a  
45  
46 direct contribution to glycemic control. Different actions may help reinforcing the role of  
47  
48 diet adherence to glycemic control, such as a close follow up by a multidisciplinary  
49  
50 health team (including nutritionists, social assistants, psychologists, and other  
51  
52 professionals), provision of patients' education, spouse and family support, encouraging  
53  
54  
55  
56  
57  
58  
59  
60

1  
2  
3  
4 diet adherence[22], and the use of digital media and electronic devices, such as smart  
5  
6 phone self-care “apps”[23].  
7  
8

9 Some studies suggest that DM1 patients undergoing close monitoring of diabetes  
10 through regular HbA1c measurements, blood glucose self-monitoring, and regular  
11 medical appointments, had lower levels of HbA1c[12,24]. We found no association  
12 between self-monitoring of blood glucose and HbA1c in the multiple variable analysis;  
13 however, our finding of an independent correlation between not measuring the HbA1c  
14 level in the previous year and greater levels of HbA1c does support the notion that a  
15 careful disease monitoring is critical for an adequate glycemic control.  
16  
17  
18  
19  
20  
21  
22  
23  
24

25 We also found that patients who had not received diabetes medical care at  
26 private services presented significantly higher HbA1c levels than their counterparts. This  
27 result raises concerns because the Brazilian public health system provides universal  
28 medical care for the majority of the population with diabetes in the country. Training the  
29 public health professionals for diabetes care and ensuring better infrastructure and  
30 access to universal assistance for patients with diabetes are critical collective actions  
31 that need to be attained in order to decrease the high percentage of DM1 patients with  
32 inadequate glycemic control. Specific actions may include providing multidisciplinary  
33 professional teams for diabetes care, and increasing access to the most advanced  
34 insulin therapies and to self-monitoring of blood glucose.  
35  
36  
37  
38  
39  
40  
41  
42  
43  
44  
45  
46  
47  
48

49 This study has some limitations. First, the cross-sectional design does not allow  
50 for establishing a temporal relation between the factors associated with high levels of  
51 HbA1c. Second, except for the HbA1c measurement, all the patients’ data, including the  
52 behavioral and clinical characteristics were collected through interviews, potentially  
53  
54  
55  
56  
57  
58  
59  
60

1  
2  
3  
4 introducing a certain degree of inaccuracy for some answers. However, interviewers are  
5  
6 widely used in epidemiological and clinical studies of diabetes and our results are  
7  
8 consistent with those of previous studies that used self-reported answers [9]. In addition,  
9  
10 self-reported data have been shown to have high agreement with medical records for  
11  
12 several questions, such as type of diabetes, family history of diabetes, therapeutic  
13  
14 regimen and disease complications[25]. Although inaccurate answers on type of  
15  
16 diabetes might have led to inclusion of some insulin-treated DM2 patients in the study  
17  
18 population, we expect this number to be small, having minimal impact on our findings  
19  
20 and conclusions. Third, typical DM1 onset happens during childhood and adolescence,  
21  
22 but our study sample only included patients  $\geq 18$  years of age and was obtained in  
23  
24 reference diabetes care centers. Therefore, we might have introduced a selection bias,  
25  
26 with participants likely having a longer disease duration, a greater number of  
27  
28 complications and, possibly, worse glycemic control. However, as the sample was  
29  
30 selected in ten large cities, from four different regions of Brazil, it is reasonable to  
31  
32 assume that the factors associated with a poor glycemic control among the studied  
33  
34 patients are representative of others DM1 patients in Brazil. On the other hand, in our  
35  
36 study we measured the HbA1c levels for all participants in a single laboratory, and used  
37  
38 the same reference method of liquid chromatography, thus avoiding problems with lack  
39  
40 of standardization reported by other authors.  
41  
42  
43  
44  
45  
46  
47  
48

49 In summary, our findings support the concept that multiple and distinct factors,  
50  
51 such as sociodemographic, behavioral and clinical drivers, act together to influence the  
52  
53 glycemic control in DM1 patients. Encouraging patients' adherence to diet and to insulin  
54  
55 treatment is critical for achieving optimum levels of HbA1c. Health education programs  
56  
57  
58  
59  
60

1  
2  
3  
4 to inform and engage patients in their treatment, as well as ensuring periodic medical  
5  
6 monitoring and measurement of HbA1c, are important additional measures. Reinforcing  
7  
8 these recommendations for public health policies and clinical guidelines may translate  
9  
10 into improved glycemic control in DM1 patients.  
11  
12  
13

### 14 15 16 17 18 19 **ACKNOWLEDGEMENTS**

20  
21 The study was supported by an unconditional grant from Pfizer Inc. The authors would  
22  
23 like to thank the team members in the collection of blood samples, interviews with  
24  
25 patients and performing HbA1c tests, and the study investigators: Adriana C. Forti, MD;  
26  
27 Ana B. V. Mendes, MD; Antônio R. Chacra, MD; Celio C. Borges, MD; Debora V.  
28  
29 Soares, MD; Edson P. Brum, MD; Elza M. S. Constantino, MD; Francisco A. Oliveira,  
30  
31 MD; Freddy Eliaschewitz, MD; Hermelinda Pedrosa, MD; João A. S. Fittipaldi, MD;  
32  
33 Jorge Gross, MD; Jose E. P. Oliveira, MD; Lucia Cordeiro, MD; Lucia P. E. Souza, MD;  
34  
35 Marcia Nery, MD; Marcos Tambascia, MD; Maria C. C. de Almeida, PhD; Maria R.  
36  
37 Calsolari, MD; Reinaldo B. M. Machado, MD; Reine Chaves, MD; Rosane Kupfer, MD;  
38  
39 Ruy Lyra, MD; Saulo Cavalcante, MD; and Silmara Leite, MD. We also thank Professor  
40  
41 Uriel Kitron for his valuable review of the manuscript. Carine S. Andrade received  
42  
43 scholarship from the Coordination for the Improvement of Higher Education Personnel  
44  
45 (CAPES), Brazilian Ministry of Education. Guilherme S. Ribeiro and Edson D. Moreira  
46  
47 Jr. received scholarships from the National Council for Scientific and Technological  
48  
49 Development (CNPq).  
50  
51  
52  
53  
54  
55  
56  
57  
58  
59  
60

## CONFLICT OF INTEREST

Carine S. Andrade has no conflicts of interest; Guilherme S. Ribeiro has no conflicts of interest; Carlos A.S.T. Santos has no conflicts of interest; Raimundo Celestino S. Neves has no conflicts of interest; Edson D. Moreira Jr. was a consultant for Pfizer Inc.

## AUTHOR CONTRIBUTIONS

Conceived and designed the experiments: Edson D Moreira Jr; Carine S Andrade; Guilherme S Ribeiro. Analysis and interpretation of data: Carine S Andrade; Guilherme S Ribeiro; Carlos AST Santos; Raimundo Celestino S Neves; Edson D Moreira Jr. Wrote the paper: Carine S Andrade; Guilherme S Ribeiro. Reviewed and approved the final version of the manuscript: Carine S Andrade; Guilherme S Ribeiro; Carlos AST Santos; Raimundo Celestino S Neves; Edson D Moreira Jr.

## AVAILABILITY OF DATA AND MATERIALS

The datasets analyzed during the current study may be available from the corresponding author on reasonable request.

## FUNDING

The Brazilian Study of Diabetes Control was funded by Pfizer Inc., Brazil.



## REFERENCE

- 1 Drouin P, Blicke JF, Charbonnel B, *et al.* Diagnosis and classification of diabetes mellitus. *Diabetes Care* 2010;**33** Suppl 1:S62-9. doi:10.2337/dc10-S062
- 2 Diaz-Valencia PA, Bougnères P, Valleron A-J. Global epidemiology of type 1 diabetes in young adults and adults: a systematic review. *BMC Public Health* 2015;**15**:255. doi:10.1186/s12889-015-1591-y
- 3 Tuomilehto J. The Emerging Global Epidemic of Type 1 Diabetes. *Curr Diab Rep* 2013;**13**:795–804. doi:10.1007/s11892-013-0433-5
- 4 DCCT. The New England Journal of Medicine Downloaded from nejm.org at FIOCRUZ on January 7, 2015. For personal use only. No other uses without permission. Copyright © 1993 Massachusetts Medical Society. All rights reserved. *N Engl J Med* 1993;**329**:977–86. <http://www.nejm.org/doi/pdf/10.1056/NEJM199309303291401>
- 5 George Bakris M, Lawrence Blonde, MD F, Andrew J.M. Boulton M, *et al.* Standards of Medical Care in Diabetes - 2015. *Diabetes Care J Clin Appl Res Educ* 2015;**38**:S1–99. doi:10.2337/dc15-S005
- 6 McCarthy M, Funk M, Grey M. Ideal Cardiovascular Health in Adults with Type 1 Diabetes. *Nurs Res* 2016;**65**:E65–E65 1/3p. doi:10.1016/j.yjmed.2016.08.019
- 7 Sastre J, Pines PJ, Moreno J, *et al.* Situacion de control metabolico y pautas de tratamiento en pacientes con diabetes tipo 1 en Castilla-La Mancha: estudio de diabetes tipo 1 en Castilla-La Mancha. *Endocrinol y Nutr* 2012;**59**:539–46. doi:10.1016/j.endonu.2012.07.003
- 8 Mendes ABV, Fittipaldi JAS, Neves RCS, *et al.* Prevalence and correlates of inadequate glycaemic control: results from a nationwide survey in 6,671 adults with diabetes in Brazil. *Acta Diabetol* 2010;**47**:137–45. doi:10.1007/s00592-009-0138-z
- 9 Braga de Souza ACC, Felício JS, Koury CC, *et al.* Health-related quality of life in people with type

- 1  
2  
3  
4 1 Diabetes Mellitus: data from the Brazilian Type 1 Diabetes Study Group. *Health Qual Life*  
5 *Outcomes* 2015;**13**:204. doi:10.1186/s12955-015-0396-0  
6  
7  
8  
9 10 Paris CA, Imperatore G, Klingensmith G, *et al.* Predictors of Insulin Regimens and Impact on  
11 Outcomes in Youth with Type 1 Diabetes: The SEARCH for Diabetes in Youth Study. *J Pediatr*  
12 2009;**155**:183–189.e1. doi:10.1016/j.jpeds.2009.01.063  
13  
14  
15 11 Nádas J, Putz Z, Fövényi J, *et al.* Cardiometabolic risk and educational level in adult patients with  
16 type 1 diabetes. *Acta Diabetol* 2009;**46**:159–62. doi:10.1007/s00592-008-0065-4  
17  
18  
19  
20 12 Pfützner A, Weissmann J, Mougiakakou S, *et al.* Glycemic Variability Is Associated with Frequency  
21 of Blood Glucose Testing and Bolus: Post Hoc Analysis Results from the ProAct Study. *Diabetes*  
22 *Technol Ther* 2015;**17**:150303065452008. doi:10.1089/dia.2014.0278  
23  
24  
25  
26  
27 13 Davison K a K, Negrato C a, Cobas R, *et al.* Relationship between adherence to diet, glycemic  
28 control and cardiovascular risk factors in patients with type 1 diabetes: a nationwide survey in  
29 Brazil. *Nutr J* 2014;**13**:19. doi:10.1186/1475-2891-13-19  
30  
31  
32  
33 14 Petitti DB, Klingensmith GJ, Bell RA, *et al.* Glycemic Control in Youth with Diabetes: The SEARCH  
34 for Diabetes in Youth Study. *J Pediatr* 2009;**155**:668–672.e3. doi:10.1016/j.jpeds.2009.05.025  
35  
36  
37  
38 15 Patterson C, Guariguata L, Dahlquist G, *et al.* Diabetes in the young – a global view and worldwide  
39 estimates of numbers of children with type 1 diabetes. *Diabetes Res Clin Pract* 2014;**103**:161–75.  
40 doi:10.1016/j.diabres.2013.11.005  
41  
42  
43  
44 16 Angamo MT, Melese BH, Ayen WY. Determinants of glycemic control among insulin treated  
45 diabetic patients in Southwest Ethiopia: hospital based cross sectional study. *PLoS One*  
46 2013;**8**:e61759. doi:10.1371/journal.pone.0061759  
47  
48  
49  
50  
51 17 Colom C, Chico A, Carreras G, *et al.* Control glucémico y complicaciones crónicas a 20 años del  
52 comienzo de la diabetes tipo 1. Resultados de una unidad especializada. *Av en Diabetol*  
53 2015;**31**:113–9. doi:10.1016/j.avdiab.2015.02.002  
54  
55  
56  
57  
58 18 Ba-Essa E, Mobarak E. Intensified glucose self-monitoring with education in Saudi DM patients. *Int*  
59  
60

- 1  
2  
3  
4  
5  
6  
7  
8  
9  
10  
11  
12  
13  
14  
15  
16  
17  
18  
19  
20  
21  
22  
23  
24  
25  
26  
27  
28  
29  
30  
31  
32  
33  
34  
35  
36  
37  
38  
39  
40  
41  
42  
43  
44  
45  
46  
47  
48  
49  
50  
51  
52  
53  
54  
55  
56  
57  
58  
59  
60
- J ... 2015;**8**:19374–80.<http://www.ncbi.nlm.nih.gov/pmc/articles/PMC4694478/>
- 19 Speight J, Holmes-Truscott E, Harvey DM, *et al*. Structured type 1 diabetes education delivered in routine care in Australia reduces diabetes-related emergencies and severe diabetes-related distress: The OzDAFNE program. *Diabetes Res Clin Pract* 2016;**112**:65–72. doi:10.1016/j.diabres.2015.11.002
- 20 Mehta SN, Volkening LK, Andreson BJ *et al*. Dietary behaviors predict glycemic control in youth with type 1 diabetes. *Diabetes Care* 2008;**31**:1318–20.<http://care.diabetesjournals.org/content/31/7/1318.full.pdf+html>
- 21 Gastal DA, Pinheiro RT, Vazquez DP. Self-efficacy scale for Brazilians with type 1 diabetes. *Sao Paulo Med J* 2007;**125**:96–101.<http://www.ncbi.nlm.nih.gov/pubmed/17625707>
- 22 Leong A, Rahme E, Dasgupta K. Spousal diabetes as a diabetes risk factor: a systematic review and meta-analysis. *BMC Med* 2014;**12**:12. doi:10.1186/1741-7015-12-12
- 23 Joshi R, Joshi D, Cheriya P. Improving adherence and outcomes in diabetic patients. *Patient Prefer Adherence* 2017;**11**:271–5. doi:10.2147/PPA.S122490
- 24 Miller KM, Beck RW, Bergenstal RM, *et al*. Evidence of a Strong Association Between Frequency of Self-Monitoring of Blood Glucose and Hemoglobin A1c Levels in T1D Exchange Clinic Registry Participants. *Diabetes Care* 2013;**36**:2009–14. doi:10.2337/dc12-1770
- 25 Løvaas KF, Cooper JG, Sandberg S, *et al*. Feasibility of using self-reported patient data in a national diabetes register. *BMC Health Serv Res* 2015;**15**:553. doi:10.1186/s12913-015-1226-0

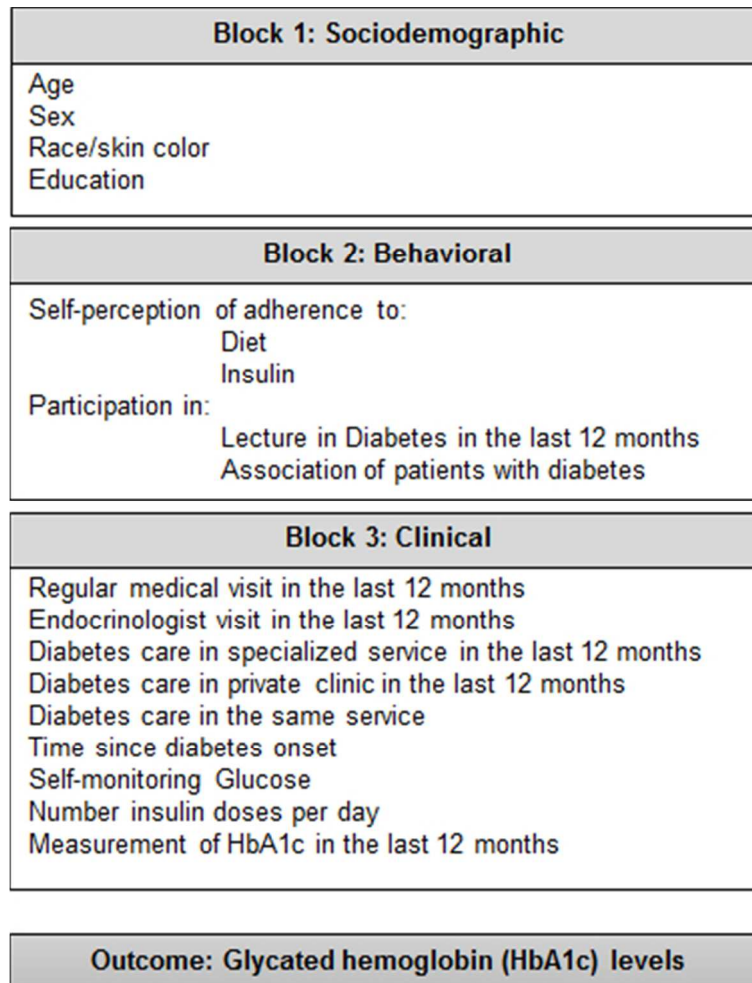

FIGURE 1. Hierarchical model for determinants of inadequate glycemic control.

STROBE 2007 (v4) Statement—Checklist of items that should be included in reports of *cross-sectional studies*

| Section/Topic                | Item # | Recommendation                                                                                                                                                                       | Reported on page # |
|------------------------------|--------|--------------------------------------------------------------------------------------------------------------------------------------------------------------------------------------|--------------------|
| Title and abstract           | 1      | (a) Indicate the study’s design with a commonly used term in the title or the abstract                                                                                               | 1                  |
|                              |        | (b) Provide in the abstract an informative and balanced summary of what was done and what was found                                                                                  | 2                  |
| <b>Introduction</b>          |        |                                                                                                                                                                                      |                    |
| Background/rationale         | 2      | Explain the scientific background and rationale for the investigation being reported                                                                                                 | 4                  |
| Objectives                   | 3      | State specific objectives, including any prespecified hypotheses                                                                                                                     | 5                  |
| <b>Methods</b>               |        |                                                                                                                                                                                      |                    |
| Study design                 | 4      | Present key elements of study design early in the paper                                                                                                                              | 5                  |
| Setting                      | 5      | Describe the setting, locations, and relevant dates, including periods of recruitment, exposure, follow-up, and data collection                                                      | 5,6                |
| Participants                 | 6      | (a) Give the eligibility criteria, and the sources and methods of selection of participants                                                                                          | 6                  |
| Variables                    | 7      | Clearly define all outcomes, exposures, predictors, potential confounders, and effect modifiers. Give diagnostic criteria, if applicable                                             | 6,7,8              |
| Data sources/<br>measurement | 8*     | For each variable of interest, give sources of data and details of methods of assessment (measurement). Describe comparability of assessment methods if there is more than one group | 7,8                |
| Bias                         | 9      | Describe any efforts to address potential sources of bias                                                                                                                            | 6,7                |
| Study size                   | 10     | Explain how the study size was arrived at                                                                                                                                            |                    |
| Quantitative variables       | 11     | Explain how quantitative variables were handled in the analyses. If applicable, describe which groupings were chosen and why                                                         | 6,7                |
| Statistical methods          | 12     | (a) Describe all statistical methods, including those used to control for confounding                                                                                                | 7,8                |
|                              |        | (b) Describe any methods used to examine subgroups and interactions                                                                                                                  | 7,8                |
|                              |        | (c) Explain how missing data were addressed                                                                                                                                          |                    |
|                              |        | (d) If applicable, describe analytical methods taking account of sampling strategy                                                                                                   | 7,8                |
|                              |        | (e) Describe any sensitivity analyses                                                                                                                                                |                    |
| <b>Results</b>               |        |                                                                                                                                                                                      |                    |

|                          |     |                                                                                                                                                                                                                                                                                                                                                                                                               |             |
|--------------------------|-----|---------------------------------------------------------------------------------------------------------------------------------------------------------------------------------------------------------------------------------------------------------------------------------------------------------------------------------------------------------------------------------------------------------------|-------------|
| Participants             | 13* | (a) Report numbers of individuals at each stage of study—eg numbers potentially eligible, examined for eligibility, confirmed eligible, included in the study, completing follow-up, and analysed<br>(b) Give reasons for non-participation at each stage<br>(c) Consider use of a flow diagram                                                                                                               | 9           |
| Descriptive data         | 14* | (a) Give characteristics of study participants (eg demographic, clinical, social) and information on exposures and potential confounders<br>(b) Indicate number of participants with missing data for each variable of interest                                                                                                                                                                               | 9,10        |
| Outcome data             | 15* | Report numbers of outcome events or summary measures                                                                                                                                                                                                                                                                                                                                                          | 11,12       |
| Main results             | 16  | (a) Give unadjusted estimates and, if applicable, confounder-adjusted estimates and their precision (eg, 95% confidence interval). Make clear which confounders were adjusted for and why they were included<br>(b) Report category boundaries when continuous variables were categorized<br>(c) If relevant, consider translating estimates of relative risk into absolute risk for a meaningful time period | 11,12,13,14 |
| Other analyses           | 17  | Report other analyses done—eg analyses of subgroups and interactions, and sensitivity analyses                                                                                                                                                                                                                                                                                                                |             |
| <b>Discussion</b>        |     |                                                                                                                                                                                                                                                                                                                                                                                                               |             |
| Key results              | 18  | Summarise key results with reference to study objectives                                                                                                                                                                                                                                                                                                                                                      | 16          |
| Limitations              | 19  | Discuss limitations of the study, taking into account sources of potential bias or imprecision. Discuss both direction and magnitude of any potential bias                                                                                                                                                                                                                                                    | 18,19       |
| Interpretation           | 20  | Give a cautious overall interpretation of results considering objectives, limitations, multiplicity of analyses, results from similar studies, and other relevant evidence                                                                                                                                                                                                                                    | 17,18       |
| Generalisability         | 21  | Discuss the generalisability (external validity) of the study results                                                                                                                                                                                                                                                                                                                                         |             |
| <b>Other information</b> |     |                                                                                                                                                                                                                                                                                                                                                                                                               |             |
| Funding                  | 22  | Give the source of funding and the role of the funders for the present study and, if applicable, for the original study on which the present article is based                                                                                                                                                                                                                                                 | 21,22       |

\*Give information separately for cases and controls in case-control studies and, if applicable, for exposed and unexposed groups in cohort and cross-sectional studies.

**Note:** An Explanation and Elaboration article discusses each checklist item and gives methodological background and published examples of transparent reporting. The STROBE checklist is best used in conjunction with this article (freely available on the Web sites of PLoS Medicine at <http://www.plosmedicine.org/>, Annals of Internal Medicine at <http://www.annals.org/>, and Epidemiology at <http://www.epidem.com/>). Information on the STROBE Initiative is available at [www.strobe-statement.org](http://www.strobe-statement.org).

# BMJ Open

## FACTORS ASSOCIATED WITH HIGH LEVELS OF GLYCATED HEMOGLOBIN IN PATIENTS WITH TYPE 1 DIABETES: A MULTICENTER STUDY IN BRAZIL

|                                    |                                                                                                                                                                                                                                                                                                                                                                                                                                                                                                                        |
|------------------------------------|------------------------------------------------------------------------------------------------------------------------------------------------------------------------------------------------------------------------------------------------------------------------------------------------------------------------------------------------------------------------------------------------------------------------------------------------------------------------------------------------------------------------|
| Journal:                           | <i>BMJ Open</i>                                                                                                                                                                                                                                                                                                                                                                                                                                                                                                        |
| Manuscript ID                      | bmjopen-2017-018094.R1                                                                                                                                                                                                                                                                                                                                                                                                                                                                                                 |
| Article Type:                      | Research                                                                                                                                                                                                                                                                                                                                                                                                                                                                                                               |
| Date Submitted by the Author:      | 25-Aug-2017                                                                                                                                                                                                                                                                                                                                                                                                                                                                                                            |
| Complete List of Authors:          | ANDRADE, CARINE; Universidade Federal da Bahia, Escola de Nutrição<br>RIBEIRO, GUILHERME; Universidade Federal da Bahia, Institute of<br>Collective Health; Oswaldo Cruz Foundation, Gonçalo Moniz Institute<br>SANTOS, CARLOS ANTONIO; Universidade Estadual de Feira de Santana;<br>Fundacao Oswaldo Cruz, Gonçalo Moniz Institute<br>NEVES, RAIMUNDO CELESTINO; Fundacao Oswaldo Cruz, Gonçalo Moniz<br>Institute<br>MOREIRA JR, EDSON; Fundacao Oswaldo Cruz, Gonçalo Moniz Institute;<br>Obras Sociais Irma Dulce |
| <b>Primary Subject<br>Heading</b>: | Diabetes and endocrinology                                                                                                                                                                                                                                                                                                                                                                                                                                                                                             |
| Secondary Subject Heading:         | Epidemiology                                                                                                                                                                                                                                                                                                                                                                                                                                                                                                           |
| Keywords:                          | type 1 diabetes, glycemic control, glycated hemoglobin, EPIDEMIOLOGY                                                                                                                                                                                                                                                                                                                                                                                                                                                   |
|                                    |                                                                                                                                                                                                                                                                                                                                                                                                                                                                                                                        |

SCHOLARONE™  
Manuscripts

Only

1  
2  
3  
4 **FACTORS ASSOCIATED WITH HIGH LEVELS OF GLYCATED HEMOGLOBIN IN**  
5  
6 **PATIENTS WITH TYPE 1 DIABETES: A MULTICENTER STUDY IN BRAZIL**  
7  
8  
9

10  
11  
12  
13  
14 Carine Sousa Andrade, PhD<sup>a,b</sup>, Guilherme Sousa Ribeiro, PhD<sup>a,c</sup>, Carlos Antonio Souza  
15  
16 Teles Santos, PhD<sup>a,d</sup>, Raimundo Celestino Silva Neves, PhD<sup>a</sup>, Edson Duarte Moreira  
17  
18 Jr., PhD<sup>a,e\*</sup>.  
19  
20

21  
22  
23  
24  
25  
26 (a) Gonçalo Moniz Institute, Oswaldo Cruz Foundation, Salvador, Brazil;

27  
28 (b) School of Nutrition, Federal University of Bahia, Salvador, Brazil;

29  
30 (c) Institute of Collective Health, Federal University of Bahia, Salvador, Brazil;

31  
32 (d) State University of Feira de Santana, Feira de Santana, Brazil;

33  
34 (e) Charitable Works Foundation of Sister Dulce, Salvador, Brazil.  
35  
36  
37  
38

39  
40 \*Address for correspondence: Dr. Edson D Moreira Jr.

41  
42 Centro de Pesquisa Gonçalo Moniz, Fundação Oswaldo Cruz, Rua Waldemar Falcão  
43  
44 121, Salvador, Bahia, 40296-710, Brazil.  
45

46  
47 Tel .: +55 71 3176 2343; Fax: +55 71 3176 2243.  
48

49  
50 E-mail: edson@bahia.fiocruz.br (E. D. Moreira Jr.).  
51  
52  
53

54  
55 Word count: 3,555 words  
56  
57  
58  
59  
60



**ABSTRACT**

Objective: Long-term complications of type 1 diabetes mellitus (DM1) can be prevented with adequate glycemic control. However, high levels of glycated hemoglobin (HbA1c) occur in 60 to 90% of the DM1 patients. Thus, we aimed to investigate the role of sociodemographic, behavioral and clinical factors on the HbA1c levels of DM1 patients in Brazil.

Design, setting and participants: A cross-sectional study was conducted with ambulatory DM1 patients aged  $\geq 18$  years from 10 Brazilian cities. Sociodemographic, behavioral and clinical data were obtained through interviews.

Main outcome measures: HbA1c level was measured by liquid chromatography.

Hierarchical multiple variable linear regression models were used to identify factors correlated with high levels of HbA1c.

Results: Of 979 DM1 patients, 63.8% were female and the mean age was 40 (SD: 14.6) years. The mean HbA1c level was 9.4% (SD: 2.2%), and 89.6% of the patients had HbA1c  $\geq 7.0\%$ . Factors independently correlated with increased HbA1c levels included: lower education, non-participation in diabetes classes/lecture during the year before, having a self-perception of poor adherence to diet and insulin, not having private medical care, and not measuring the HbA1c levels in the prior year. Of note, poor adherence to diet and insulin were the independent factors most strongly associated with high levels of HbA1c (mean increment in HbA1c levels of 0.88% and 1.25%, respectively).

Conclusion: Poor glycemic control, which is common among DM1 Brazilian patients, is associated with lower education, self-perception of insufficient adherence to diet and

1  
2  
3  
4 insulin, and inadequate monitoring of HbA1c levels. Specific actions, particularly those  
5  
6 targeting improving adherence to diet and insulin, may contribute to successful  
7  
8 management of DM1 patients.  
9  
10

11  
12  
13  
14 Keywords: type 1 diabetes, glycemic control, glycosylated hemoglobin, epidemiology.  
15  
16  
17

### 18 19 **Strengths and limitations of this study**

- 20  
21 • This cross-sectional, multicenter study included 979 type 1 diabetes mellitus  
22  
23 patients from ten large Brazilian cities, representing four of the five regions of the  
24  
25 country.  
26  
27
- 28 • We measured the HbA1c levels for all participants in a single laboratory, and  
29  
30 used the same reference method of liquid chromatography, thus avoiding  
31  
32 problems with lack of standardization reported by other authors.  
33  
34
- 35 • In order to identify independent factors associated with increased levels of  
36  
37 HbA1c, we applied robust, multiple variable models, using a hierarchical  
38  
39 approach according to a previously defined conceptual framework. This method  
40  
41 accounts for hierarchical inter-relationships between variables and for the  
42  
43 potential underestimation of the effects of distal determinants.  
44  
45
- 46 • Data on behavioral and clinical characteristics were collected through interviews,  
47  
48 potentially introducing a certain degree of inaccuracy for some answers.  
49  
50  
51  
52  
53  
54  
55  
56  
57  
58  
59  
60

## 1. INTRODUCTION

Type 1 diabetes mellitus (DM1) is characterized by the destruction of the insulin-producing pancreatic  $\beta$  cells, leading to an hyperglycemic state that requires continued reposition of exogenous insulin in order to prevent life-threatening acute and chronic complications[1]. The disease annual incidence varies greatly between countries, ranging from 1.1 to 39.9 per 100,000 persons 15-19 years of age[2], and is globally increasing at a rate of approximately 3% per year[3].

Patients with DM1 are at increased risk for cardiovascular disease, periphery nerve damage, nephropathy, and retinopathy, resulting in reduced life expectancy for those who are not properly treated[1]. This risk can be substantially reduced with intensive glycemic control, aiming for glyated hemoglobin (HbA1c) levels  $<6.0\%$ [4]. However, most patients with DM1 have HbA1c values above the international recommendation of  $<7.0\%$ [5]. Inadequate glycemic control (HbA1c levels  $>7.0\%$  in DM1 patients was observed in 77% of the participants of a study in the United States in 2016[6], in 74% of the study patients in the region of Castilla-La Mancha, Spain in 2012[7], and in 84%-90% of the participants of national multicenter studies conducted in Brazil in 2010 and 2015[8,9].

A better understanding of the factors that determine glycemic control is critical to improved management of DM1 patients. However, the majority of studies investigating determinants of glycemic control enrolled patients with type 2 diabetes mellitus (DM2) or studied patients with DM1 and DM2 combined, despite the fact that challenges to achieve glycemic control differ between patients with DM1 and DM2, mainly due to the compulsory need of insulin use in DM1 patients. In the few published reports on

1  
2  
3  
4 determinants of glycemic control in DM1 patients, high levels of HbA1c have been  
5 associated with younger age, low educational level, poor adherence to diet, mode of  
6 insulin administration, and infrequent monitoring of blood glucose[10–14]. Here, we  
7 describe the results of our study in which we investigated the role of sociodemographic,  
8 behavioral and clinical characteristics in the levels of HbA1c in a large sample of  
9 patients with DM1 in Brazil, a country where >31,000 persons <15 years of age have  
10 DM1[15].  
11  
12  
13  
14  
15  
16  
17  
18  
19  
20  
21  
22  
23  
24  
25

## 26 **2. SUBJECTS, MATERIAL AND METHODS**

### 27 **2.1. Study Design and Sample Selection:**

28  
29  
30 This cross-sectional, multicenter study was conducted in ten large Brazilian cities,  
31 representing four of the five regions of the country (Southeast region: Belo Horizonte,  
32 Campinas, Rio de Janeiro, and São Paulo; South region: Curitiba, and Porto Alegre;  
33 Midwest region: Brasilia; and Northeast region: Salvador, Fortaleza and Recife). These  
34 cities are the largest in their respective regions, and nine of them were ranked among  
35 the most populous municipalities in Brazil. To pursue the selection of the diabetes  
36 medical centers, we requested the Brazilian Diabetes Association to identify in each of  
37 the study city a list of candidate centers, selected because of previous experience in  
38 conducting epidemiological research and where a large number of adult patients are  
39 treated for diabetes (minimum of 300 patients per month). In each city, two diabetes  
40 centers (20 centers in total) were invited to participate in the study: five university-  
41  
42  
43  
44  
45  
46  
47  
48  
49  
50  
51  
52  
53  
54  
55  
56  
57  
58  
59  
60

1  
2  
3  
4 affiliated hospitals, eleven general public hospitals, and four not-for-profit private  
5  
6 hospitals. All invited centers accepted and were included in the study.  
7  
8

9 From February 2006 to March 2007, we invited patients fulfilling the eligibility  
10 criteria to participate in the study during 30 consecutive days in each of the centers. To  
11 be eligible for study enrollment, patients had to be 18 years of age or older and report a  
12 prior medical diagnosis of DM1. Patients who had participated in other research in the  
13 three months preceding the study were excluded. All patients were informed about the  
14 study aims, procedures and risks, and signed an informed consent prior to inclusion.  
15  
16 The study was approved by the Hospital Santo Antônio Ethics Committee (approval  
17 number 32/05).  
18  
19  
20  
21  
22  
23  
24  
25  
26  
27  
28  
29

## 30 **2.2. Data Collection:**

31  
32 Trained interviewers who were not part of the medical centers staff interviewed  
33 the participants using a structured questionnaire to obtain data on demographic and  
34 socioeconomic indicators, self-perception of diet and insulin treatment adherence,  
35 attendance to diabetes education lectures, participation in associations of patients with  
36 diabetes, and clinical characteristics. The clarity of the questionnaire was assessed  
37 through pilot interviews in a sample of DM1 patients previously to study initiation. Data  
38 on education attainment (primary school or less, complete or incomplete secondary/high  
39 school, or at least some college level education) and on race/skin color were self-  
40 reported. Data on self-perception of diet adherence and of insulin adherence were  
41 collected using the following ordinal scale: poor/fair, good, or excellent. Clinical data  
42 included time since first diagnosis of diabetes, number of insulin doses per day,  
43  
44  
45  
46  
47  
48  
49  
50  
51  
52  
53  
54  
55  
56  
57  
58  
59  
60

1  
2  
3  
4 frequency of self-monitoring of blood glucose, as well as frequencies, in the previous 12  
5 months, of consultation in public and private medical service facilities, consultation with  
6 an endocrinologist, prior hypoglycemic episodes, prior hospitalizations due to  
7 ketoacidosis and HbA1c measurements. Interviews were conducted in a private room  
8 and lasted 20-25 minutes. The response rate was 84% (ranging from 78% to 95%).  
9  
10  
11  
12  
13  
14  
15  
16  
17  
18

### 19 **2.3. Measurement of Glycated Hemoglobin (HbA1c):**

20  
21 A blood sample was collected from participants at enrollment and tested by  
22 automated high performance liquid chromatography to determine HbA1c levels. All  
23 exams were performed in the same laboratory, according to standard procedures. The  
24 HbA1c levels data were reported as mean and standard deviation (SD) and,  
25 categorically, as a frequency of <7.0%, 7.0-8.9%, 9.0-10.9%, or  $\geq 11.0\%$ . We considered  
26 glycemic control to be inadequate when the HbA1c concentration was  $\geq 7.0\%$ [5].  
27  
28  
29  
30  
31  
32  
33  
34  
35  
36  
37

### 38 **2.4. Statistical Analysis:**

39  
40 Data were double entered into a computerized database using the EPI INFO  
41 version 3.04 software system (Centers for Disease Control and Prevention, Atlanta,  
42 USA). Subsequently, the two databases were electronic compared to validate the  
43 accuracy and internal consistency of the data. Statistical analyses were performed using  
44 version 12 of STATA (StataCorp., College Station, USA).  
45  
46  
47  
48  
49  
50

51  
52 Participants' characteristics were presented using means and standard deviation  
53 for continuous variables, and frequencies for categorical variables. We applied bivariate  
54 and multiple variables linear regression models to estimate the effect of the independent  
55  
56  
57  
58  
59  
60

1  
2  
3  
4 variables on the level of HbA1c. Variables with a significant association at  $p$  value of  
5  
6  $\leq 0.20$  in the bivariate analyses were included in robust, multiple variable models using a  
7  
8 hierarchical approach according to a previously defined conceptual framework (Figure  
9  
10 1). A conceptual framework is a theoretical model that describes the hierarchical  
11  
12 relationships between explanatory variables and an outcome. This approach is  
13  
14 considered an appropriate strategy for assessing disease determinants in multiple  
15  
16 variable analyses because it handles complex hierarchical inter-relationships between  
17  
18 variables and accounts for the potential underestimation of the effects of distal  
19  
20 determinants (i.e. factors that typically do not determine the outcome directly, but do  
21  
22 mediated by other intermediate factors)[16].  
23  
24  
25  
26  
27

28 The hierarchical model grouped variables in three blocks (Figure 1). Block 1  
29  
30 contained socioeconomic variables, such as education level and race/skin color. Block 2  
31  
32 contained behavioral variables, such as attendance to diabetes class/lectures,  
33  
34 participation in associations of patients with diabetes, and self-perception of adherence  
35  
36 to diet and insulin treatment. Block 3 comprised of clinical characteristics, including time  
37  
38 since first diagnosis of diabetes, number of insulin doses per day, and frequency of self-  
39  
40 monitoring of blood glucose, consultation with an endocrinologist, and HbA1c  
41  
42 measurement in the previous 12 months (Figure 1).  
43  
44  
45  
46

47 A backward elimination strategy was then performed for each block. Block 1  
48  
49 variables that were significantly correlated with HbA1c serum levels at a  $p$  value  $\leq 0.05$   
50  
51 were maintained in the subsequent backward elimination model with block 2 variables.  
52  
53 Using the same approach, block 2 variables that were significantly correlated with  
54  
55 HbA1c serum levels at a  $p$  value  $\leq 0.05$  were maintained in the subsequent backward  
56  
57  
58  
59  
60

1  
2  
3  
4 elimination model with block 3 variables. Finally, block 3 variables with a  $p$  value  $\leq 0.05$   
5  
6 were defined as factors independently correlated with the HbA1c levels. Variables from  
7  
8 block 1 and block 2 that were selected to be included in following models were  
9  
10 considered to be significantly correlated with HbA1c levels, regardless of their  $p$  value in  
11  
12 the subsequent models. Sex and age were included in all models to ensure adjustments  
13  
14 to these factors at all stages of the multiple variable analyses. We used the Akaike  
15  
16 Information Criterion (AIC) to estimate the goodness of fit of the successive adjusted  
17  
18 models.  
19  
20  
21  
22  
23  
24  
25

### 26 **3. RESULTS**

27  
28 Of the 979 DM1 patients enrolled in the study, 625 (63.8%) were female, and 296  
29  
30 (30.2%) were 18-29 years of age, 412 (42.1%) 30-49 years of age, and 271 (27.7%)  $\geq 50$   
31  
32 years of age (Table 1). About half (488, 49.8%) of the patients were white, and 398  
33  
34 (40.8%) had not studied beyond the primary school level. The Southeast region of Brazil  
35  
36 accounted for 611 (62.4%) participants. Although all the diabetes centers were affiliated  
37  
38 with the Brazilian public health care system, 95 (9.7%) of the patients reported they had  
39  
40 also received private assistance during the past 12 months.  
41  
42  
43  
44  
45  
46  
47  
48  
49  
50  
51  
52  
53  
54  
55  
56  
57  
58  
59  
60



TABLE 1. Sociodemographic and clinical characteristics of 979 Brazilian patients with type 1 diabetes, Brazil.

| Characteristics                                   | n (%)      |
|---------------------------------------------------|------------|
| <b>SOCIODEMOGRAPHICS</b>                          |            |
| Age (years)                                       |            |
| 18 – 29                                           | 296 (30.2) |
| 30 – 49                                           | 412 (42.1) |
| ≥ 50                                              | 271 (27.7) |
| Sex Female                                        | 625 (63.8) |
| Race/Skin color                                   |            |
| White                                             | 488 (49.8) |
| Mixed                                             | 286 (29.2) |
| Black                                             | 122 (12.5) |
| Other                                             | 83 (8.5)   |
| Education <sup>1</sup>                            |            |
| At least some College                             | 154 (15.8) |
| Secondary/High school                             | 424 (43.4) |
| Primary school or less                            | 398 (40.8) |
| Brazilian Region                                  |            |
| Southeast                                         | 611 (62.4) |
| Northeast                                         | 174 (17.8) |
| South                                             | 104 (10.6) |
| Center-west                                       | 90 (9.2)   |
| Type of service for medical care in the last year |            |
| Public                                            | 884 (90.3) |
| Private                                           | 95 (9.7)   |
| <b>CLINICAL COMPLICATIONS</b>                     |            |
| Hypoglycemic episodes in the last year            | 497 (50.8) |
| Ketoacidosis hospitalization in the last year     | 248 (25.3) |
| Reported complications                            |            |
| Retinopathy                                       | 427 (43.6) |
| Neuropathy <sup>2</sup>                           | 381 (39.2) |
| Nephropathy                                       | 207 (21.1) |
| Angina <sup>3</sup>                               | 129 (13.2) |
| Vasculopathy <sup>3</sup>                         | 125 (12.8) |
| <b>LABORATORY</b>                                 |            |
| Glycated Hemoglobin (HbA1c) (%)                   |            |
| <7.0                                              | 102 (10.4) |
| 7.0 – 8.9                                         | 366 (37.4) |
| 9.0 – 10.9                                        | 287 (29.3) |
| >11.0                                             | 224 (22.9) |

<sup>1</sup> Data available for 976 patients

<sup>2</sup> Data available for 973 patients

<sup>3</sup> Data available for 977 patients

1  
2  
3  
4  
5 The diabetes complications most frequently reported by the study participants  
6 were retinopathy (427, 43.6%), followed by neuropathy (381, 39.2%) and nephropathy  
7 (207, 21.1%). Episodes of ketoacidosis and hypoglycemia in the previous year were  
8 common, affecting 248 (25.3%) and 497 (50.8%) patients, respectively. The majority  
9 (887, 89.6%) of patients had inadequate glycemic control (HbA1c  $\geq$ 7.0%), and the mean  
10 HbA1c level was 9.4% (SD: 2.2%).  
11  
12  
13  
14  
15  
16  
17  
18

19 Bivariate analysis pointed to a correlation of higher levels of HbA1c with black  
20 race, lower education attainment, self-perception of fair/poor adherence to diet and to  
21 insulin treatment, not participating in diabetes class/lectures during the previous year,  
22 and never having participated in associations of patients with diabetes (Table 2). In  
23 addition, patients who reported that in the previous year had neither regular medical  
24 appointments, nor consultations with an endocrinologist, private consultations or health  
25 care delivered in the same diabetes center had significantly higher HbA1c. Finally,  
26 patients not performing regular self-monitoring of blood glucose, those with no measure  
27 of HbA1c during the previous year, and patients receiving less than four doses of insulin  
28 per day also had higher levels of HbA1c.  
29  
30  
31  
32  
33  
34  
35  
36  
37  
38  
39  
40  
41  
42  
43  
44  
45  
46  
47  
48  
49  
50  
51  
52  
53  
54  
55  
56  
57  
58  
59  
60

TABLE 2. Factors associated with glycated hemoglobin (HbA1c) levels in Brazilian patients with type 1 diabetes.

| Independent variable                                   | N° participants | HbA1c means in %<br>(SD) | $\beta$ Coefficient (CI 95%) | p value |
|--------------------------------------------------------|-----------------|--------------------------|------------------------------|---------|
| <b>BLOCK 1 – SOCIODEMOGRAPHIC</b>                      |                 |                          |                              |         |
| Age (years)                                            |                 |                          |                              |         |
| 18 – 29                                                | 296             | 9.35 (2.36)              | Ref                          | 0.198   |
| 30 – 49                                                | 412             | 9.54 (2.28)              | 0.186 (-0.146; 0.517)        |         |
| ≥ 50                                                   | 271             | 9.24 (1.95)              | -0.118 (-0.484; 0.248)       |         |
| Sex                                                    |                 |                          |                              |         |
| Male                                                   | 354             | 9.25 (2.08)              | Ref                          | 0.122   |
| Female                                                 | 625             | 9.48 (2.29)              | 0.229 (-0.061; 0.518)        |         |
| Race/Skin color                                        |                 |                          |                              |         |
| White                                                  | 488             | 9.26 (2.10)              | Ref                          | 0.058   |
| Mixed                                                  | 286             | 9.32 (2.33)              | 0.133 (-0.191; 0.456)        |         |
| Black                                                  | 122             | 9.84 (2.34)              | 0.576 (0.136; 1.017)         |         |
| Other                                                  | 83              | 9.62 (2.31)              | 0.361 (-0.155; 0.877)        |         |
| Education                                              |                 |                          |                              |         |
| At least some College                                  | 154             | 9.13 (1.82)              | Ref                          | 0.002   |
| Secondary/High school                                  | 424             | 9.21 (2.15)              | 0.084 (-0.325; 0.492)        |         |
| Primary school or less                                 | 398             | 9.70 (2.40)              | 0.565 (0.154; 0.977)         |         |
| <b>BLOCK 2 – BEHAVIORAL</b>                            |                 |                          |                              |         |
| Self-perception of adherence to diet                   |                 |                          |                              |         |
| Excellent                                              | 129             | 8.79 (2.22)              | Ref                          | <0.001  |
| Good                                                   | 327             | 9.13 (2.09)              | 0.344 (-0.103; 0.792)        |         |
| Fair / Poor                                            | 523             | 9.72 (2.25)              | 0.931 (0.508; 1.354)         |         |
| Self-perception of adherence to insulin                |                 |                          |                              |         |
| Excellent                                              | 750             | 9.28 (2.12)              | Ref                          | <0.001  |
| Good                                                   | 144             | 9.59 (2.30)              | 0.315 (-0.074; 0.703)        |         |
| Fair / Poor                                            | 62              | 10.82 (2.49)             | 1.543 (0.978; 2.107)         |         |
| Participation in lecture for diabetes in the last year |                 |                          |                              |         |
| Yes                                                    | 345             | 9.11 (2.09)              | Ref                          | <0.001  |
| No                                                     | 540             | 9.67 (2.31)              | 0.549 (0.247; 0.850)         |         |
| Participation in association of diabetics patients     |                 |                          |                              |         |
| Yes, still participate                                 | 116             | 9.09 (1.88)              | Ref                          | 0.023   |
| Yes, but no more participate                           | 124             | 9.02 (1.80)              | -0.067 (-0.627; 0.492)       |         |
| No, I never participated                               | 713             | 9.51 (2.32)              | 0.418 (-0.016; 0.851)        |         |
| <b>BLOCK 3 – CLINICAL</b>                              |                 |                          |                              |         |
| Body mass index (kg/m <sup>2</sup> )                   |                 |                          |                              |         |
| <25                                                    | 502             | 9.45 (2.29)              | Ref                          | 0.273   |
| ≥25                                                    | 455             | 9.30 (2.08)              | -0.156 (-0.435; 0.123)       |         |
| Regular medical visit in the last year                 |                 |                          |                              |         |
| Yes                                                    | 878             | 9.34 (2.19)              | Ref                          | 0.020   |
| No                                                     | 101             | 9.89 (2.42)              | 0.541 (0.084; 0.998)         |         |

|    |                                                       |     |              |                        |        |
|----|-------------------------------------------------------|-----|--------------|------------------------|--------|
| 1  |                                                       |     |              |                        |        |
| 2  | Endocrinologist visit in the last year                |     |              |                        |        |
| 3  | Yes                                                   | 800 | 9.32 (2.15)  | Ref                    | 0.014  |
| 4  | No                                                    | 177 | 9.77 (2.50)  | 0.453 (0.091; 0.814)   |        |
| 5  | Diabetes care in specialized service in the last year |     |              |                        |        |
| 6  | Yes                                                   | 661 | 9.32 (2.18)  | Ref                    | 0.120  |
| 7  | No                                                    | 318 | 9.56 (2.29)  | 0.236 (-0.061; 0.533)  |        |
| 8  | Diabetes care in private clinic in the last year      |     |              |                        |        |
| 9  | Yes                                                   | 95  | 8.87 (1.61)  | Ref                    | 0.014  |
| 10 | No                                                    | 884 | 9.46 (2.27)  | 0.586 (0.117; 1.055)   |        |
| 11 | Diabetes care in the same service                     |     |              |                        |        |
| 12 | Yes                                                   | 921 | 9.36 (2.18)  | Ref                    | 0.015  |
| 13 | No                                                    | 57  | 10.10 (2.64) | 0.735 (0.142; 1.328)   |        |
| 14 | Time since diabetes onset (years)                     |     |              |                        |        |
| 15 | < 10                                                  | 261 | 9.43 (2.66)  | Ref                    | 0.326  |
| 16 | 10 – 19                                               | 307 | 9.52 (2.11)  | 0.094 (-0.273; 0.460)  |        |
| 17 | ≥ 20                                                  | 408 | 9.27 (1.97)  | -0.115 (-0.497; 0.192) |        |
| 18 | Self-monitoring glucose                               |     |              |                        |        |
| 19 | Yes, regularly                                        | 663 | 9.25 (2.14)  | Ref                    | 0.008  |
| 20 | Yes, when decompensated                               | 160 | 9.72 (2.28)  | 0.463 (0.080; 0.845)   |        |
| 21 | No                                                    | 151 | 9.74 (2.46)  | 0.489 (0.097; 0.881)   |        |
| 22 | Number insulin doses per day                          |     |              |                        |        |
| 23 | 4 times                                               | 168 | 8.91 (1.97)  | Ref                    | 0.001  |
| 24 | 3 times                                               | 290 | 9.38 (2.10)  | 0.477 (0.062; 0.892)   |        |
| 25 | 2 times or less                                       | 505 | 9.61 (2.29)  | 0.707 (0.326; 1.088)   |        |
| 26 | Measurement HbA1c in the last year                    |     |              |                        |        |
| 27 | Yes                                                   | 533 | 9.10 (1.93)  | Ref                    | <0.001 |
| 28 | No                                                    | 184 | 10.00 (2.48) | 0.901 (0.576; 1.226)   |        |
| 29 | Do not know                                           | 261 | 9.40 (2.43)  | 0.298 (-0.070; 0.665)  |        |

Bivariate linear regression analyses.

1  
2  
3  
4  
5 The first multiple variable model, built with the socioeconomic variables (Model A,  
6 Table 3), showed that for each one year rise in age, HbA1c level were, on average,  
7 reduced by 0.01% ( $\beta=-0.013$ , 95% CI: -0.025, -0.002) and that education level only up to  
8 primary school was correlated with higher HbA1c levels ( $\beta=0.565$ , 95% CI: 0.154,  
9 0.977). The second multiple variable model, which combined the behavioral variables  
10 with the selected variables from model A (Model B, Table 3), found that not participating  
11 in diabetes class/lecture during the previous year ( $\beta=0.503$ , 95% CI: 0.208, 0.799) and a  
12 self-perception of fair/poor adherence to diet ( $\beta=0.889$ , 95% CI: 0.446, 1.332) and to  
13 insulin therapy ( $\beta=1.385$ , 95% CI: 0.764, 2.007) were also positively correlated with  
14 HbA1c levels. The third multiple variable model, which incorporated the clinical variables  
15 with those selected in model B (Model C, Table 3), found that not consulting at a private  
16 clinic during the previous year ( $\beta=0.545$ , 95% CI: 0.021, 1.069) and having no HbA1c  
17 measurement performed in the previous year ( $\beta=0.770$ , 95% CI: 0.418; 1.122) were  
18 positively correlated with the HbA1c levels. It is noteworthy to mention that the effect of  
19 education over HbA1c levels was reduced with the subsequent introduction of further  
20 variables from blocks 2 and 3 (Models B and C), indicating that the effect of education  
21 on glycemetic control was mediated by the behavioral and clinical variables incorporated  
22 to the model.  
23  
24  
25  
26  
27  
28  
29  
30  
31  
32  
33  
34  
35  
36  
37  
38  
39  
40  
41  
42  
43  
44  
45  
46  
47  
48  
49  
50  
51  
52  
53  
54  
55  
56  
57  
58  
59  
60

TABLE 3. Hierarchical model of multiple linear regression analyses for determinants of inadequate glycemc control in 846 Brazilian patients with type 1 diabetes.

| Independent variable                                   | Unadjusted                   | Model A                      | Model B                      | Model C                      |
|--------------------------------------------------------|------------------------------|------------------------------|------------------------------|------------------------------|
|                                                        | $\beta$ coefficient (95% IC) |
| <b>BLOCK 1: SOCIODEMOGRAPHIC</b>                       |                              |                              |                              |                              |
| Age (years)                                            | -0.003 (-0.012; 0.007)       | -0.013 (-0.025; -0.002)      | -0.008 (-0.019; 0.002)       | -0.009 (-0.020; 0.001)       |
| Sex                                                    |                              |                              |                              |                              |
| Male                                                   | Ref                          | Ref                          | Ref                          | Ref                          |
| Female                                                 | 0.229 (-0.061; 0.518)        | 0.243 (-0.065; 0.551)        | 0.311 (0.012; 0.610)         | 0.286 (-0.009; 0.582)        |
| Education                                              |                              |                              |                              |                              |
| At least some College                                  | Ref                          | Ref                          | Ref                          | Ref                          |
| Secondary/High school                                  | 0.084 (-0.325; 0.492)        | 0.141 (-0.288; 0.572)        | 0.081 (-0.336; 0.499)        | -0.254 (-0.709; 0.199)       |
| Primary school or less                                 | 0.565 (0.154; 0.977)         | 0.765 (0.313; 1.217)         | 0.551 (0.106; 0.996)         | 0.090 (-0.409; 0.590)        |
| <b>BLOCK 2: BEHAVIORAL</b>                             |                              |                              |                              |                              |
| Self-perception of adherence to diet                   |                              |                              |                              |                              |
| Excellent                                              | Ref                          |                              | Ref                          | Ref                          |
| Good                                                   | 0.344 (-0.103; 0.792)        |                              | 0.401 (-0.062; 0.866)        | 0.377 (-0.081; 0.836)        |
| Fair / Poor                                            | 0.931 (0.508; 1.354)         |                              | 0.889 (0.446; 1.332)         | 0.876 (0.439; 1.313)         |
| Self-perception of adherence to insulin                |                              |                              |                              |                              |
| Excellent                                              | Ref                          |                              | Ref                          | Ref                          |
| Good                                                   | 0.315 (-0.074; 0.703)        |                              | 0.295 (-0.112; 0.702)        | 0.239 (-0.164; 0.642)        |
| Fair / Poor                                            | 1.543 (0.978; 2.107)         |                              | 1.385 (0.764; 2.007)         | 1.242 (0.625; 1.858)         |
| Participation in lecture for diabetes in the last year |                              |                              |                              |                              |
| Yes                                                    | Ref                          |                              | Ref                          | Ref                          |
| No                                                     | 0.549 (0.247; 0.850)         |                              | 0.503 (0.208; 0.799)         | 0.482 (0.184; 0.779)         |
| <b>BLOCK 3: CLINICAL</b>                               |                              |                              |                              |                              |
| Diabetes care in private clinic in the last year       |                              |                              |                              |                              |
| Yes                                                    | Ref                          |                              |                              | Ref                          |
| No                                                     | 0.586 (0.117; 1.055)         |                              |                              | 0.545 (0.021; 1.069)         |
| Measurement HbA1c in the last year                     |                              |                              |                              |                              |
| Yes                                                    | Ref                          |                              |                              | Ref                          |
| No                                                     | 0.901 (0.576; 1.226)         |                              |                              | 0.770 (0.418; 1.122)         |
| Do not know                                            | 0.298 (-0.070; 0.665)        |                              |                              | 0.243 (-0.170; 0.657)        |
| AIC*:                                                  | Not Applicable               | 3,735.893                    | 3,685.672                    | 3,666.879                    |

Note: Model A shows associations between sociodemographic factors (block 1) and the levels of glycated hemoglobin (HbA1c). Model B shows associations between sociodemographic and behavioral factors (blocks 1 and 2) and HbA1c levels. Model C shows associations between sociodemographic, behavioral, and clinical factors (blocks 1, 2 and 3), and HbA1c levels. \*Akaike Information Criteria.

#### 4. DISCUSSION

Our results indicate that sociodemographic, behavioral and clinical factors in DM1 patients are independently associated with high levels of HbA1c. Of note, self-reported poor adherence to diet was strongly associated with elevated HbA1c levels. This finding is of special relevance because adherence to diet is a modifiable factor, possibly accomplished by specific actions targeting those noncompliant to dietary recommendations. These findings add valuable information for a better understanding of the barriers to achieve adequate glycemic control in adult patients with DM1.

The American Diabetes Association (ADA) recommends that patients with a recent diagnosis of diabetes and without major complications or prior history of severe hypoglycemic episodes should target HbA1c levels of <6.5%, while patients with advanced micro and macrovascular complications or comorbidities aim towards HbA1c levels of <8.0%[5]. This recommendation is supported by studies conducted over two decades ago, showing that poor glycemic control is associated with microvascular and macrovascular complications in patients with diabetes[4,5]. Despite that, the majority of DM1 patients worldwide have inadequate glycemic control[7,17,18]. In our study, we found that the mean HbA1c level was 9.4%, the same result observed in another multicenter, DM1 study, conducted in 20 Brazilian cities between 2008 and 2010[9]. This study also found that the quality of life of DM1 patients was inversely related to the levels of HbA1c.

In our multiple variable model including only the sociodemographic variables, we found that patients whose highest level of educational attainment was primary school had a mean level of HbA1c 0.77% greater than patients with at least some college level

1  
2  
3  
4 education. The relation between lower educational attainment of DM1 patients and  
5  
6 higher levels of HbA1c has been previously reported[7,11]. However, a noteworthy  
7  
8 finding of our study is that the correlation coefficient between educational levels and  
9  
10 HbA1c levels decreased after we incorporated the behavioral variables (Model B) and  
11  
12 almost disappeared when the clinical factors were included (Model C). The differences  
13  
14 observed in the education level correlation coefficients among these models indicate  
15  
16 that the effect of lower education on the level of HbA1c is possibly mediated by  
17  
18 behavioral (adherence to diet and insulin, and participation in lecture for diabetes in the  
19  
20 last year) and, especially, by clinical factors (attendance to private clinics and  
21  
22 measurement of HbA1c, both in the year before). This original finding is of relevance  
23  
24 because it highlights that the influence of lower education on inadequate glycemic  
25  
26 control can be surpassed if DM1 patients have good adherence to diet and treatment,  
27  
28 and if receive proper monitoring of HbA1c levels.  
29  
30  
31  
32  
33  
34

35       Regarding the behavioral factors, we found that participation in diabetes  
36  
37 education programs was associated with better glycemic control, consistent with  
38  
39 previous studies. In a case-control study conducted in Saudi Arabia, patients with DM1  
40  
41 or DM2 who had received monthly counseling about the disease, had significantly  
42  
43 reduced HbA1c levels compared to those who had received counseling only at the  
44  
45 beginning of the study[19]. In another single-arm, pre-post cohort study, aiming to  
46  
47 estimate the impact of improving the knowledge, skills and confidence in self-  
48  
49 management of DM1, the average HbA1c levels was significantly reduced from baseline  
50  
51 to follow-up measurements[20]. The mechanisms by which diabetes education programs  
52  
53 help achieve a better glycemic control are likely diverse, and may include provision of  
54  
55  
56  
57  
58  
59  
60



1  
2  
3  
4 knowledge about the disease, aid in developing skills and techniques for disease self-  
5 management, and support for adoption of healthy eating and lifestyle habits. Our  
6 findings reinforce the importance of policies and practices that challenge the traditional  
7 medical care of DM1 and include educational activities to empower patients to achieve  
8 goals for glycemic control.  
9

10  
11  
12  
13  
14  
15  
16 A lower degree of self-perceived adherence to diet and insulin therapy were also  
17 strongly associated with higher levels of HbA1c among our study patients. These  
18 findings are in accordance with other studies of DM1 patients, in which the average  
19 HbA1c was significantly lower among patients who followed dietary recommendations,  
20 compared to those who did not[13,21]. A study that enrolled both DM1 and DM2, insulin-  
21 treated patients also found after adjusting for confounders that better glycemic control  
22 was associated with adherence to a dietary plan that included greater daily ingestion of  
23 fruits and vegetables, but not with adherence to insulin therapy[17]. However, Gastal et  
24 al.[22] found that better scores in a diabetes self-care scale evaluating diabetes general  
25 management, diet, exercise, care with feet, glycemic monitoring, insulin administration,  
26 and detection, prevention or treatment of hypoglycemia/hyperglycemia were associated  
27 with lower HbA1c values. Thus, additional evidence supports our findings that  
28 adherence to both diet and insulin regimens are essential for glycemic control and for  
29 subsequent prevention of disease complications and early death. We recommend that  
30 health professional involved in DM1 care devote substantive efforts to motivate patients  
31 to follow diet recommendations and treatment prescriptions. Whenever possible, they  
32 should try to simplify the treatment regimen and work to guarantee a proper  
33 understanding of their patients about the disease and its management. Further  
34  
35  
36  
37  
38  
39  
40  
41  
42  
43  
44  
45  
46  
47  
48  
49  
50  
51  
52  
53  
54  
55  
56  
57  
58  
59  
60

1  
2  
3  
4 observational studies, aiming to identify factors that influence adherence to both diet and  
5  
6 insulin, are warranted. In addition, experimental trials should compare the efficacy of  
7  
8 different strategies to improve patients' compliance to diet and treatment. Such  
9  
10 strategies may include different motivational approaches to improve adherence, as well  
11  
12 as the use of different insulin delivery devices.  
13  
14

15  
16 Unfortunately, we did not collect detailed data on diet and food consumption,  
17  
18 which would allow a better understanding of its role on glycemic control. Even though,  
19  
20 our finding of an inverse relation between the degree of self-perceived adherence to diet  
21  
22 and HbA1c levels suggests that following specific alimentary recommendations have a  
23  
24 direct contribution to glycemic control. Several actions may help reinforcing the role of  
25  
26 diet adherence to glycemic control, such as a close follow up by a multidisciplinary  
27  
28 health team (including nutritionists, social assistants, psychologists, and other  
29  
30 professionals), provision of patients' education, spouse and family support, encouraging  
31  
32 diet adherence[23], and the use of digital media and electronic devices, such as smart  
33  
34 phone self-care "apps"[24].  
35  
36  
37  
38  
39

40 Some studies suggest that DM1 patients undergoing close monitoring of diabetes  
41  
42 through regular HbA1c measurements, blood glucose self-monitoring, and regular  
43  
44 medical appointments, had lower levels of HbA1c[12,25,26]. We found in bivariate  
45  
46 analysis, but not in multiple variable analyses, that those self-monitoring blood glucose  
47  
48 on a regular basis had lower HbA1c levels. The failure of our multiple variable analyses  
49  
50 to show this association may derive from the method that we used to obtain data on  
51  
52 blood glucose self-monitoring, which was self-reported, not relying on diaries or other  
53  
54 more accurate sources to quantify the daily frequency of self-monitoring in a typical day.  
55  
56  
57  
58  
59  
60

1  
2  
3  
4  
5 However, our finding that patients who did not measure the HbA1c level in the previous  
6  
7 year had greater levels of HbA1c, even after adjustment for other variables, does  
8  
9 support the notion that a careful disease monitoring is critical for an adequate glycaemic  
10  
11 control. Thus, regular monitoring of glycaemic levels should be an essential chapter of  
12  
13 policies and programs designed to provide improved care for DM1 patients.  
14

15  
16 We also found that patients who had not received diabetes medical care at  
17  
18 private services presented significantly higher HbA1c levels than those who had. This  
19  
20 result raises concerns because the Brazilian public health system provides universal  
21  
22 medical care for the majority of the population with diabetes in the country. Training the  
23  
24 public health professionals for diabetes care and ensuring better infrastructure and  
25  
26 access to universal assistance for patients with diabetes are critical collective actions  
27  
28 that need to be attained in order to decrease the high percentage of DM1 patients with  
29  
30 inadequate glycaemic control. Specific actions may include providing multidisciplinary  
31  
32 professional teams for diabetes care, and increasing access to the most advanced  
33  
34 insulin therapies and to self-monitoring of blood glucose.  
35  
36  
37  
38

39  
40 This study has some limitations. First, the cross-sectional design does not allow  
41  
42 for establishing a temporal relation between the factors associated with high levels of  
43  
44 HbA1c. Therefore, a thorough follow-up of DM1 patients through a cohort study is  
45  
46 warranted and may help elucidate whether the factors we found to be associated with  
47  
48 higher HbA1c levels are causally related to poor glycaemic control. Second, except for  
49  
50 the HbA1c measurement, all the patients' data, including the behavioral and clinical  
51  
52 characteristics were collected through interviews, potentially introducing a certain degree  
53  
54 of inaccuracy for some answers. However, interviews are widely used in epidemiological  
55  
56  
57  
58  
59  
60

1  
2  
3  
4 and clinical studies of diabetes and our results are consistent with those of previous  
5 studies that used self-reported answers [9]. In addition, self-reported data have been  
6 shown to have high agreement with medical records for several questions, such as type  
7 of diabetes, family history of diabetes, therapeutic regimen and disease  
8 complications[27]. Although inaccurate answers on type of diabetes might have led to  
9 inclusion of some insulin-treated DM2 patients in the study population, we expect this  
10 number to be small, having minimal impact on our findings and conclusions. Third,  
11 typical DM1 onset happens during childhood and adolescence, but our study sample  
12 only included patients  $\geq 18$  years of age and was obtained in reference diabetes care  
13 centers. Therefore, we might have introduced a selection bias, with participants likely  
14 having a longer disease duration, a greater number of complications and, possibly,  
15 worse glycemic control. In addition, the study patients were not randomly selected.  
16 However, as the DM1 patients sample was consecutively enrolled during 30 days in 20  
17 diabetes centers from ten large cities in four different regions of Brazil, it is reasonable to  
18 assume that the factors associated with a poor glycemic control among the studied  
19 patients can be generalized to patients with DM1 seeking care in large urban centers in  
20 the country. On the other hand, in our study we measured the HbA1c levels for all  
21 participants in a single laboratory, and used the same reference method of liquid  
22 chromatography, thus avoiding problems with lack of standardization reported by other  
23 authors.

24  
25  
26  
27  
28  
29  
30  
31  
32  
33  
34  
35  
36  
37  
38  
39  
40  
41  
42  
43  
44  
45  
46  
47  
48  
49  
50  
51  
52 In summary, our findings support the concept that multiple and distinct factors,  
53 such as sociodemographic, behavioral and clinical drivers, act together to influence the  
54 glycemic control in DM1 patients. Encouraging patients' adherence to diet and to insulin  
55  
56  
57  
58  
59  
60

1  
2  
3  
4 treatment is critical for achieving optimum levels of HbA1c. Health education programs  
5  
6 to inform and engage patients in their treatment, as well as ensuring periodic medical  
7  
8 monitoring and measurement of HbA1c, are important additional measures. Reinforcing  
9  
10 these recommendations for public health policies and clinical guidelines may translate  
11  
12 into improved glycemic control in DM1 patients.  
13  
14  
15  
16  
17  
18  
19  
20

## 21 **ACKNOWLEDGEMENTS**

22  
23 The study was supported by an unconditional grant from Pfizer Inc. The authors would  
24  
25 like to thank the team members in the collection of blood samples, interviews with  
26  
27 patients and performing HbA1c tests, and the study investigators: Adriana C. Forti, MD;  
28  
29 Ana B. V. Mendes, MD; Antônio R. Chacra, MD; Celio C. Borges, MD; Debora V.  
30  
31 Soares, MD; Edson P. Brum, MD; Elza M. S. Constantino, MD; Francisco A. Oliveira,  
32  
33 MD; Freddy Eliaschewitz, MD; Hermelinda Pedrosa, MD; João A. S. Fittipaldi, MD;  
34  
35 Jorge Gross, MD; Jose E. P. Oliveira, MD; Lucia Cordeiro, MD; Lucia P. E. Souza, MD;  
36  
37 Marcia Nery, MD; Marcos Tambascia, MD; Maria C. C. de Almeida, PhD; Maria R.  
38  
39 Calsolari, MD; Reinaldo B. M. Machado, MD; Reine Chaves, MD; Rosane Kupfer, MD;  
40  
41 Ruy Lyra, MD; Saulo Cavalcante, MD; and Silmara Leite, MD. We also thank Professor  
42  
43 Uriel Kitron for his valuable review of the manuscript. Carine S. Andrade received  
44  
45 scholarship from the Coordination for the Improvement of Higher Education Personnel  
46  
47 (CAPES), Brazilian Ministry of Education. Guilherme S. Ribeiro and Edson D. Moreira  
48  
49 Jr. received scholarships from the National Council for Scientific and Technological  
50  
51 Development (CNPq).  
52  
53  
54  
55  
56  
57  
58  
59  
60

## CONFLICT OF INTEREST

Carine S. Andrade has no conflicts of interest; Guilherme S. Ribeiro has no conflicts of interest; Carlos A.S.T. Santos has no conflicts of interest; Raimundo Celestino S. Neves has no conflicts of interest; Edson D. Moreira Jr. was a consultant for Pfizer Inc.

## AUTHOR CONTRIBUTIONS

Conceived and designed the experiments: Edson D Moreira Jr; Carine S Andrade; Guilherme S Ribeiro. Analysis and interpretation of data: Carine S Andrade; Guilherme S Ribeiro; Carlos AST Santos; Raimundo Celestino S Neves; Edson D Moreira Jr. Wrote the paper: Carine S Andrade; Guilherme S Ribeiro. Reviewed and approved the final version of the manuscript: Carine S Andrade; Guilherme S Ribeiro; Carlos AST Santos; Raimundo Celestino S Neves; Edson D Moreira Jr.

## AVAILABILITY OF DATA AND MATERIALS

The datasets analyzed during the current study may be available from the corresponding author on reasonable request.

## FUNDING

The Brazilian Study of Diabetes Control was funded by Pfizer Inc., Brazil.

## REFERENCE

- 1 Drouin P, Blickle JF, Charbonnel B, *et al.* Diagnosis and classification of diabetes mellitus. *Diabetes Care* 2010;**33** Suppl 1:S62-9. doi:10.2337/dc10-S062
- 2 Diaz-Valencia PA, Bougnères P, Valleron A-J. Global epidemiology of type 1 diabetes in young adults and adults: a systematic review. *BMC Public Health* 2015;**15**:255. doi:10.1186/s12889-015-1591-y
- 3 Tuomilehto J. The Emerging Global Epidemic of Type 1 Diabetes. *Curr Diab Rep* 2013;**13**:795–804. doi:10.1007/s11892-013-0433-5
- 4 DCCT. The New England Journal of Medicine Downloaded from nejm.org at FIOCRUZ on January 7, 2015. For personal use only. No other uses without permission. Copyright © 1993 Massachusetts Medical Society. All rights reserved. *N Engl J Med* 1993;**329**:977–86. <http://www.nejm.org/doi/pdf/10.1056/NEJM199309303291401>
- 5 George Bakris M, Lawrence Blonde, MD F, Andrew J.M. Boulton M, *et al.* Standards of Medical Care in Diabetes - 2015. *Diabetes Care J Clin Appl Res Educ* 2015;**38**:S1–99. doi:10.2337/dc15-S005
- 6 McCarthy M, Funk M, Grey M. Ideal Cardiovascular Health in Adults with Type 1 Diabetes. *Nurs Res* 2016;**65**:E65–E65 1/3p. doi:10.1016/j.yjmed.2016.08.019
- 7 Sastre J, Pines PJ, Moreno J, *et al.* Situacion de control metabolico y pautas de tratamiento en pacientes con diabetes tipo 1 en Castilla-La Mancha: estudio de diabetes tipo 1 en Castilla-La Mancha. *Endocrinol y Nutr* 2012;**59**:539–46. doi:10.1016/j.endonu.2012.07.003
- 8 Mendes ABV, Fittipaldi JAS, Neves RCS, *et al.* Prevalence and correlates of inadequate glycaemic control: results from a nationwide survey in 6,671 adults with diabetes in Brazil. *Acta Diabetol* 2010;**47**:137–45. doi:10.1007/s00592-009-0138-z
- 9 Braga de Souza ACC, Felício JS, Koury CC, *et al.* Health-related quality of life in people with type

- 1  
2  
3  
4 1 Diabetes Mellitus: data from the Brazilian Type 1 Diabetes Study Group. *Health Qual Life*  
5 *Outcomes* 2015;**13**:204. doi:10.1186/s12955-015-0396-0  
6  
7  
8  
9 10 Paris CA, Imperatore G, Klingensmith G, *et al.* Predictors of Insulin Regimens and Impact on  
11 Outcomes in Youth with Type 1 Diabetes: The SEARCH for Diabetes in Youth Study. *J Pediatr*  
12 2009;**155**:183–189.e1. doi:10.1016/j.jpeds.2009.01.063  
13  
14  
15 11 Nádas J, Putz Z, Fövényi J, *et al.* Cardiometabolic risk and educational level in adult patients with  
16 type 1 diabetes. *Acta Diabetol* 2009;**46**:159–62. doi:10.1007/s00592-008-0065-4  
17  
18  
19 12 Pfützner A, Weissmann J, Mougiakakou S, *et al.* Glycemic Variability Is Associated with Frequency  
20 of Blood Glucose Testing and Bolus: Post Hoc Analysis Results from the ProAct Study. *Diabetes*  
21 *Technol Ther* 2015;**17**:150303065452008. doi:10.1089/dia.2014.0278  
22  
23  
24 13 Davison K a K, Negrato C a, Cobas R, *et al.* Relationship between adherence to diet, glycemic  
25 control and cardiovascular risk factors in patients with type 1 diabetes: a nationwide survey in  
26 Brazil. *Nutr J* 2014;**13**:19. doi:10.1186/1475-2891-13-19  
27  
28  
29 14 Petitti DB, Klingensmith GJ, Bell RA, *et al.* Glycemic Control in Youth with Diabetes: The SEARCH  
30 for Diabetes in Youth Study. *J Pediatr* 2009;**155**:668–672.e3. doi:10.1016/j.jpeds.2009.05.025  
31  
32  
33 15 Patterson C, Guariguata L, Dahlquist G, *et al.* Diabetes in the young – a global view and worldwide  
34 estimates of numbers of children with type 1 diabetes. *Diabetes Res Clin Pract* 2014;**103**:161–75.  
35 doi:10.1016/j.diabres.2013.11.005  
36  
37  
38 16 Victora CG, Huttly SR, Fuchs SC, *et al.* The role of conceptual frameworks in epidemiological  
39 analysis: a hierarchical approach. *Int J Epidemiol* 1997;**26**:224–7. doi:10.1093/ije/26.1.224  
40  
41  
42 17 Angamo MT, Melese BH, Ayen WY. Determinants of glycemic control among insulin treated  
43 diabetic patients in Southwest Ethiopia: hospital based cross sectional study. *PLoS One*  
44 2013;**8**:e61759. doi:10.1371/journal.pone.0061759  
45  
46  
47 18 Colom C, Chico A, Carreras G, *et al.* Control glucémico y complicaciones crónicas a 20 años del  
48 comienzo de la diabetes tipo 1. Resultados de una unidad especializada. *Av en Diabetol*  
49  
50  
51  
52  
53  
54  
55  
56  
57  
58  
59  
60



- 2015;**31**:113–9. doi:10.1016/j.avdiab.2015.02.002
- 19 Ba-Essa E, Mobarak E. Intensified glucose self-monitoring with education in Saudi DM patients. *Int J ...* 2015;**8**:19374–80. <http://www.ncbi.nlm.nih.gov/pmc/articles/PMC4694478/>
- 20 Speight J, Holmes-Truscott E, Harvey DM, *et al.* Structured type 1 diabetes education delivered in routine care in Australia reduces diabetes-related emergencies and severe diabetes-related distress: The OzDAFNE program. *Diabetes Res Clin Pract* 2016;**112**:65–72. doi:10.1016/j.diabres.2015.11.002
- 21 Mehta SN, Volkening LK, Andreson BJ *et al.* Dietary behaviors predict glycemic control in youth with type 1 diabetes. *Diabetes Care* 2008;**31**:1318–20. <http://care.diabetesjournals.org/content/31/7/1318.full.pdf+html>
- 22 Gastal DA, Pinheiro RT, Vazquez DP. Self-efficacy scale for Brazilians with type 1 diabetes. *Sao Paulo Med J* 2007;**125**:96–101. <http://www.ncbi.nlm.nih.gov/pubmed/17625707>
- 23 Leong A, Rahme E, Dasgupta K. Spousal diabetes as a diabetes risk factor: a systematic review and meta-analysis. *BMC Med* 2014;**12**:12. doi:10.1186/1741-7015-12-12
- 24 Joshi R, Joshi D, Cheriya P. Improving adherence and outcomes in diabetic patients. *Patient Prefer Adherence* 2017;**11**:271–5. doi:10.2147/PPA.S122490
- 25 Miller KM, Beck RW, Bergenstal RM, *et al.* Evidence of a Strong Association Between Frequency of Self-Monitoring of Blood Glucose and Hemoglobin A1c Levels in T1D Exchange Clinic Registry Participants. *Diabetes Care* 2013;**36**:2009–14. doi:10.2337/dc12-1770
- 26 Jin S-M, Baek JH, Suh S, *et al.* Factors Associated with Greater Benefit of a National Reimbursement Policy for Blood Glucose Test Strips in Adult Patients with Type 1 Diabetes: A Prospective Cohort Study. *J Diabetes Investig* 2017;**8**:0–2. doi:10.1111/jdi.12728
- 27 Løvaas KF, Cooper JG, Sandberg S, *et al.* Feasibility of using self-reported patient data in a national diabetes register. *BMC Health Serv Res* 2015;**15**:553. doi:10.1186/s12913-015-1226-0

1  
2  
3  
4  
5  
6  
7  
8  
9  
10  
11  
12  
13  
14  
15  
16  
17  
18  
19  
20  
21  
22  
23  
24  
25  
26  
27  
28  
29  
30  
31  
32  
33  
34  
35  
36  
37  
38  
39  
40  
41  
42  
43  
44  
45  
46  
47  
48  
49  
50  
51  
52  
53  
54  
55  
56  
57  
58  
59  
60

FIGURE 1. Hierarchical model for determinants of high levels of glycated hemoglobin in patients with type 1 diabetes.

For peer review only



FIGURE 1. Hierarchical model for determinants of high levels of glycated hemoglobin in patients with type 1 diabetes.

STROBE 2007 (v4) Statement—Checklist of items that should be included in reports of cross-sectional studies

| Section/Topic             | Item # | Recommendation                                                                                                                                                                       | Reported on page # |
|---------------------------|--------|--------------------------------------------------------------------------------------------------------------------------------------------------------------------------------------|--------------------|
| Title and abstract        | 1      | (a) Indicate the study’s design with a commonly used term in the title or the abstract                                                                                               | 1                  |
|                           |        | (b) Provide in the abstract an informative and balanced summary of what was done and what was found                                                                                  | 2                  |
| <b>Introduction</b>       |        |                                                                                                                                                                                      |                    |
| Background/rationale      | 2      | Explain the scientific background and rationale for the investigation being reported                                                                                                 | 4                  |
| Objectives                | 3      | State specific objectives, including any prespecified hypotheses                                                                                                                     | 5                  |
| <b>Methods</b>            |        |                                                                                                                                                                                      |                    |
| Study design              | 4      | Present key elements of study design early in the paper                                                                                                                              | 5                  |
| Setting                   | 5      | Describe the setting, locations, and relevant dates, including periods of recruitment, exposure, follow-up, and data collection                                                      | 5,6                |
| Participants              | 6      | (a) Give the eligibility criteria, and the sources and methods of selection of participants                                                                                          | 6                  |
| Variables                 | 7      | Clearly define all outcomes, exposures, predictors, potential confounders, and effect modifiers. Give diagnostic criteria, if applicable                                             | 6,7,8              |
| Data sources/ measurement | 8*     | For each variable of interest, give sources of data and details of methods of assessment (measurement). Describe comparability of assessment methods if there is more than one group | 7,8                |
| Bias                      | 9      | Describe any efforts to address potential sources of bias                                                                                                                            | 6,7                |
| Study size                | 10     | Explain how the study size was arrived at                                                                                                                                            |                    |
| Quantitative variables    | 11     | Explain how quantitative variables were handled in the analyses. If applicable, describe which groupings were chosen and why                                                         | 6,7                |
| Statistical methods       | 12     | (a) Describe all statistical methods, including those used to control for confounding                                                                                                | 7,8                |
|                           |        | (b) Describe any methods used to examine subgroups and interactions                                                                                                                  | 7,8                |
|                           |        | (c) Explain how missing data were addressed                                                                                                                                          |                    |
|                           |        | (d) If applicable, describe analytical methods taking account of sampling strategy                                                                                                   | 7,8                |
|                           |        | (e) Describe any sensitivity analyses                                                                                                                                                |                    |
| <b>Results</b>            |        |                                                                                                                                                                                      |                    |

|                          |     |                                                                                                                                                                                                                                                                                                                                                                                                               |             |
|--------------------------|-----|---------------------------------------------------------------------------------------------------------------------------------------------------------------------------------------------------------------------------------------------------------------------------------------------------------------------------------------------------------------------------------------------------------------|-------------|
| Participants             | 13* | (a) Report numbers of individuals at each stage of study—eg numbers potentially eligible, examined for eligibility, confirmed eligible, included in the study, completing follow-up, and analysed<br>(b) Give reasons for non-participation at each stage<br>(c) Consider use of a flow diagram                                                                                                               | 9           |
| Descriptive data         | 14* | (a) Give characteristics of study participants (eg demographic, clinical, social) and information on exposures and potential confounders<br>(b) Indicate number of participants with missing data for each variable of interest                                                                                                                                                                               | 9,10        |
| Outcome data             | 15* | Report numbers of outcome events or summary measures                                                                                                                                                                                                                                                                                                                                                          | 11,12       |
| Main results             | 16  | (a) Give unadjusted estimates and, if applicable, confounder-adjusted estimates and their precision (eg, 95% confidence interval). Make clear which confounders were adjusted for and why they were included<br>(b) Report category boundaries when continuous variables were categorized<br>(c) If relevant, consider translating estimates of relative risk into absolute risk for a meaningful time period | 11,12,13,14 |
| Other analyses           | 17  | Report other analyses done—eg analyses of subgroups and interactions, and sensitivity analyses                                                                                                                                                                                                                                                                                                                |             |
| <b>Discussion</b>        |     |                                                                                                                                                                                                                                                                                                                                                                                                               |             |
| Key results              | 18  | Summarise key results with reference to study objectives                                                                                                                                                                                                                                                                                                                                                      | 16          |
| Limitations              | 19  | Discuss limitations of the study, taking into account sources of potential bias or imprecision. Discuss both direction and magnitude of any potential bias                                                                                                                                                                                                                                                    | 18,19       |
| Interpretation           | 20  | Give a cautious overall interpretation of results considering objectives, limitations, multiplicity of analyses, results from similar studies, and other relevant evidence                                                                                                                                                                                                                                    | 17,18       |
| Generalisability         | 21  | Discuss the generalisability (external validity) of the study results                                                                                                                                                                                                                                                                                                                                         |             |
| <b>Other information</b> |     |                                                                                                                                                                                                                                                                                                                                                                                                               |             |
| Funding                  | 22  | Give the source of funding and the role of the funders for the present study and, if applicable, for the original study on which the present article is based                                                                                                                                                                                                                                                 | 21,22       |

\*Give information separately for cases and controls in case-control studies and, if applicable, for exposed and unexposed groups in cohort and cross-sectional studies.

**Note:** An Explanation and Elaboration article discusses each checklist item and gives methodological background and published examples of transparent reporting. The STROBE checklist is best used in conjunction with this article (freely available on the Web sites of PLoS Medicine at <http://www.plosmedicine.org/>, Annals of Internal Medicine at <http://www.annals.org/>, and Epidemiology at <http://www.epidem.com/>). Information on the STROBE Initiative is available at [www.strobe-statement.org](http://www.strobe-statement.org).

# BMJ Open

## FACTORS ASSOCIATED WITH HIGH LEVELS OF GLYCATED HEMOGLOBIN IN PATIENTS WITH TYPE 1 DIABETES: A MULTICENTER STUDY IN BRAZIL

|                                    |                                                                                                                                                                                                                                                                                                                                                                                                                                                                                                                        |
|------------------------------------|------------------------------------------------------------------------------------------------------------------------------------------------------------------------------------------------------------------------------------------------------------------------------------------------------------------------------------------------------------------------------------------------------------------------------------------------------------------------------------------------------------------------|
| Journal:                           | <i>BMJ Open</i>                                                                                                                                                                                                                                                                                                                                                                                                                                                                                                        |
| Manuscript ID                      | bmjopen-2017-018094.R2                                                                                                                                                                                                                                                                                                                                                                                                                                                                                                 |
| Article Type:                      | Research                                                                                                                                                                                                                                                                                                                                                                                                                                                                                                               |
| Date Submitted by the Author:      | 16-Oct-2017                                                                                                                                                                                                                                                                                                                                                                                                                                                                                                            |
| Complete List of Authors:          | ANDRADE, CARINE; Universidade Federal da Bahia, Escola de Nutrição<br>RIBEIRO, GUILHERME; Universidade Federal da Bahia, Institute of<br>Collective Health; Oswaldo Cruz Foundation, Gonçalo Moniz Institute<br>SANTOS, CARLOS ANTONIO; Universidade Estadual de Feira de Santana;<br>Fundacao Oswaldo Cruz, Gonçalo Moniz Institute<br>NEVES, RAIMUNDO CELESTINO; Fundacao Oswaldo Cruz, Gonçalo Moniz<br>Institute<br>MOREIRA JR, EDSON; Fundacao Oswaldo Cruz, Gonçalo Moniz Institute;<br>Obras Sociais Irma Dulce |
| <b>Primary Subject<br>Heading</b>: | Diabetes and endocrinology                                                                                                                                                                                                                                                                                                                                                                                                                                                                                             |
| Secondary Subject Heading:         | Epidemiology                                                                                                                                                                                                                                                                                                                                                                                                                                                                                                           |
| Keywords:                          | type 1 diabetes, glycemic control, glycated hemoglobin, EPIDEMIOLOGY                                                                                                                                                                                                                                                                                                                                                                                                                                                   |
|                                    |                                                                                                                                                                                                                                                                                                                                                                                                                                                                                                                        |

SCHOLARONE™  
Manuscripts

Only

1  
2  
3  
4 **FACTORS ASSOCIATED WITH HIGH LEVELS OF GLYCATED HEMOGLOBIN IN**  
5  
6 **PATIENTS WITH TYPE 1 DIABETES: A MULTICENTER STUDY IN BRAZIL**  
7  
8  
9

10  
11  
12  
13  
14 Carine Sousa Andrade, PhD<sup>a,b</sup>, Guilherme Sousa Ribeiro, PhD<sup>a,c</sup>, Carlos Antonio Souza  
15  
16 Teles Santos, PhD<sup>a,d</sup>, Raimundo Celestino Silva Neves, PhD<sup>a</sup>, Edson Duarte Moreira  
17  
18 Jr., PhD<sup>a,e\*</sup>.  
19  
20

21  
22  
23  
24  
25  
26 (a) Gonçalo Moniz Institute, Oswaldo Cruz Foundation, Salvador, Brazil;

27  
28 (b) School of Nutrition, Federal University of Bahia, Salvador, Brazil;

29  
30 (c) Institute of Collective Health, Federal University of Bahia, Salvador, Brazil;

31  
32 (d) State University of Feira de Santana, Feira de Santana, Brazil;

33  
34 (e) Charitable Works Foundation of Sister Dulce, Salvador, Brazil.  
35  
36  
37  
38

39  
40 \*Address for correspondence: Dr. Edson D Moreira Jr.

41  
42 Centro de Pesquisa Gonçalo Moniz, Fundação Oswaldo Cruz, Rua Waldemar Falcão  
43  
44 121, Salvador, Bahia, 40296-710, Brazil.  
45

46  
47 Tel .: +55 71 3176 2343; Fax: +55 71 3176 2243.  
48

49  
50 E-mail: edson@bahia.fiocruz.br (E. D. Moreira Jr.).  
51  
52

53  
54 Word count: 3,669 words  
55  
56  
57  
58  
59  
60

**ABSTRACT**

Objective: Long-term complications of type 1 diabetes mellitus (DM1) can be prevented with adequate glycemic control. However, high levels of glycated hemoglobin (HbA1c) occur in 60 to 90% of the DM1 patients. Thus, we aimed to investigate the role of sociodemographic, behavioral and clinical factors on the HbA1c levels of DM1 patients in Brazil.

Design, setting and participants: A cross-sectional study was conducted with ambulatory DM1 patients aged  $\geq 18$  years from 10 Brazilian cities. Sociodemographic, behavioral and clinical data were obtained through interviews.

Main outcome measures: HbA1c level was measured by liquid chromatography.

Hierarchical multiple variable linear regression models were used to identify factors correlated with high levels of HbA1c.

Results: Of 979 DM1 patients, 63.8% were female and the mean age was 40 (SD: 14.6) years. The mean HbA1c level was 9.4% (SD: 2.2%), and 89.6% of the patients had HbA1c  $\geq 7.0\%$ . Factors independently correlated with increased HbA1c levels included: lower education, non-participation in diabetes classes/lecture during the year before, having a self-perception of poor adherence to diet and insulin, not having private medical care, and not measuring the HbA1c levels in the prior year. Of note, poor adherence to diet and insulin were the independent factors most strongly associated with high levels of HbA1c (mean increment in HbA1c levels of 0.88% and 1.25%, respectively).

Conclusion: Poor glycemic control, which is common among DM1 Brazilian patients, is associated with lower education, self-perception of insufficient adherence to diet and



1  
2  
3  
4 insulin, and inadequate monitoring of HbA1c levels. Specific actions, particularly those  
5  
6 targeting improving adherence to diet and insulin, may contribute to successful  
7  
8 management of DM1 patients.  
9  
10

11  
12  
13  
14 Keywords: type 1 diabetes, glycemic control, glycosylated hemoglobin, epidemiology.  
15  
16  
17

### 18 19 **Strengths and limitations of this study**

- 20  
21 • This cross-sectional, multicenter study included 979 type 1 diabetes mellitus  
22  
23 patients from ten large Brazilian cities, representing four of the five regions of the  
24  
25 country.  
26  
27
- 28 • We measured the HbA1c levels for all participants in a single laboratory, and  
29  
30 used the same reference method of liquid chromatography, thus avoiding  
31  
32 problems with lack of standardization reported by other authors.  
33  
34
- 35 • In order to identify independent factors associated with increased levels of  
36  
37 HbA1c, we applied robust, multiple variable models, using a hierarchical  
38  
39 approach according to a previously defined conceptual framework. This method  
40  
41 accounts for hierarchical inter-relationships between variables and for the  
42  
43 potential underestimation of the effects of distal determinants.  
44  
45
- 46 • Data on behavioral and clinical characteristics were collected through interviews,  
47  
48 potentially introducing a certain degree of inaccuracy for some answers.  
49  
50  
51  
52  
53  
54  
55  
56  
57  
58  
59  
60

## 1. INTRODUCTION

Type 1 diabetes mellitus (DM1) is characterized by the destruction of the insulin-producing pancreatic  $\beta$  cells, leading to an hyperglycemic state that requires continued reposition of exogenous insulin in order to prevent life-threatening acute and chronic complications[1]. The disease annual incidence varies greatly between countries, ranging from 1.1 to 39.9 per 100,000 persons 15-19 years of age[2], and is globally increasing at a rate of approximately 3% per year[3].

Patients with DM1 are at increased risk for cardiovascular disease, periphery nerve damage, nephropathy, and retinopathy, resulting in reduced life expectancy for those who are not properly treated[1]. This risk can be substantially reduced with intensive glycemic control, aiming for glyated hemoglobin (HbA1c) levels  $<6.0\%$ [4]. However, most patients with DM1 have HbA1c values above the international recommendation of  $<7.0\%$ [5]. Inadequate glycemic control (HbA1c levels  $>7.0\%$ ) in DM1 patients was observed in 77% of the participants of a study in the United States in 2016[6], in 74% of the study patients in the region of Castilla-La Mancha, Spain in 2012[7], in 87% of patients surveyed in Venezuela[8], and in 84%-90% of the participants of national multicenter studies conducted in Brazil in 2010 and 2015[9,10].

A better understanding of the factors that determine glycemic control is critical to improved management of DM1 patients. However, the majority of studies investigating determinants of glycemic control enrolled patients with type 2 diabetes mellitus (DM2) or studied patients with DM1 and DM2 combined, despite the fact that challenges to achieve glycemic control differ between patients with DM1 and DM2, mainly due to the compulsory need of insulin use in DM1 patients. In the few published reports on

1  
2  
3  
4 determinants of glycemic control in DM1 patients, high levels of HbA1c have been  
5 associated with younger age, low educational level, poor adherence to diet, mode of  
6 insulin administration, and infrequent monitoring of blood glucose[11–15]. Here, we  
7 describe the results of our study in which we investigated the role of sociodemographic,  
8 behavioral and clinical characteristics in the levels of HbA1c in a large sample of  
9 patients with DM1 in Brazil, a country where >31,000 persons <15 years of age have  
10 DM1 and where the disease burden in adults had not been estimated[16].  
11  
12  
13  
14  
15  
16  
17  
18  
19  
20  
21  
22  
23  
24  
25

## 26 **2. SUBJECTS, MATERIAL AND METHODS**

### 27 **2.1. Study Design and Sample Selection:**

28 Detailed information on this cross-sectional, multicenter study was published  
29 before[9]. Briefly, the study was conducted in ten large Brazilian cities, representing four  
30 of the five regions of the country (Southeast region: Belo Horizonte, Campinas, Rio de  
31 Janeiro, and São Paulo; South region: Curitiba, and Porto Alegre; Midwest region:  
32 Brasilia; and Northeast region: Salvador, Fortaleza and Recife). These cities are the  
33 largest in their respective regions, and nine of them were ranked among the most  
34 populous municipalities in Brazil. To pursue the selection of the diabetes medical  
35 centers, we requested the Brazilian Diabetes Association to identify in each of the study  
36 city a list of candidate centers, selected because of previous experience in conducting  
37 epidemiological research and where a large number of adult patients are treated for  
38 diabetes (minimum of 300 patients per month). In each city, two diabetes centers (20  
39 centers in total) were invited to participate in the study: five university-affiliated hospitals,  
40  
41  
42  
43  
44  
45  
46  
47  
48  
49  
50  
51  
52  
53  
54  
55  
56  
57  
58  
59  
60

1  
2  
3  
4 eleven general public hospitals, and four not-for-profit private hospitals. All invited  
5  
6 centers accepted and were included in the study.  
7  
8

9 From February 2006 to March 2007, we invited patients fulfilling the eligibility  
10  
11 criteria to participate in the study during 30 consecutive days in each of the centers. To  
12  
13 be eligible for study enrollment, patients had to be 18 years of age or older and report a  
14  
15 prior medical diagnosis of DM1. Patients who had participated in other research in the  
16  
17 three months preceding the study were excluded. All patients were informed about the  
18  
19 study aims, procedures and risks, and signed an informed consent prior to inclusion.  
20  
21 The study was approved by the Hospital Santo Antônio Ethics Committee (approval  
22  
23 number 32/05).  
24  
25  
26  
27  
28  
29

## 30 **2.2. Data Collection:**

31  
32 Trained interviewers who were not part of the medical centers staff interviewed  
33  
34 the participants using a structured questionnaire (supplementary file) to obtain data on  
35  
36 demographic and socioeconomic indicators, self-perception of diet and insulin treatment  
37  
38 adherence, attendance to diabetes education lectures, participation in associations of  
39  
40 patients with diabetes, and clinical characteristics. The clarity of the questionnaire was  
41  
42 assessed through pilot interviews in a sample of DM1 patients previously to study  
43  
44 initiation. Data on education attainment (primary school or less, complete or incomplete  
45  
46 secondary/high school, or at least some college level education) and on race/skin color  
47  
48 were self-reported. Data on self-perception of diet adherence and of insulin adherence  
49  
50 were collected using the following ordinal scale: poor/fair, good, or excellent. Clinical  
51  
52 data included self-referred height and weight, time since first diagnosis of diabetes,  
53  
54  
55  
56  
57  
58  
59  
60

1  
2  
3  
4 number of insulin doses per day, frequency of self-monitoring of blood glucose, as well  
5  
6 as frequencies, in the previous 12 months, of consultation in public and private medical  
7  
8 service facilities, consultation with an endocrinologist, prior hypoglycemic episodes, prior  
9  
10 hospitalizations due to ketoacidosis and HbA1c measurements. Interviews were  
11  
12 conducted in a private room and lasted 20-25 minutes. The response rate was 84%  
13  
14 (ranging from 78% to 95%).  
15  
16  
17  
18  
19  
20

### 21 **2.3. Measurement of Glycated Hemoglobin (HbA1c):**

22  
23 A blood sample was collected from participants at enrollment and tested by  
24  
25 automated high performance liquid chromatography to determine HbA1c levels. All  
26  
27 exams were performed in the same laboratory, according to standard procedures. The  
28  
29 HbA1c levels data were reported as mean and standard deviation (SD) and,  
30  
31 categorically, as a frequency of <7.0%, 7.0-8.9%, 9.0-10.9%, or ≥11.0%. We considered  
32  
33 glycemic control to be inadequate when the HbA1c concentration was ≥7.0%[5].  
34  
35  
36  
37  
38  
39

### 40 **2.4. Statistical Analysis:**

41  
42 Data were double entered into a computerized database using the EPI INFO  
43  
44 version 3.04 software system (Centers for Disease Control and Prevention, Atlanta,  
45  
46 USA). Subsequently, the two databases were electronic compared to validate the  
47  
48 accuracy and internal consistency of the data. Statistical analyses were performed using  
49  
50 version 12 of STATA (StataCorp., College Station, USA).  
51  
52  
53

54 Participants' characteristics were presented using means and standard deviation  
55  
56 for continuous variables, and frequencies for categorical variables. Patients' body mass  
57  
58  
59  
60

1  
2  
3  
4 index (BMI) was calculated (by dividing weight in kilograms by the square of height in  
5  
6 meters) and classified as eutrophic ( $<25.0 \text{ kg/m}^2$ ) and overweight/obese ( $\geq 25.0 \text{ kg/m}^2$ ),  
7  
8 according to the World Health Organization criteria[17].  
9  
10

11 We applied bivariate and multiple variables linear regression models to estimate  
12 the effect of the independent variables on the level of HbA1c. Variables with a significant  
13 association at p value of  $\leq 0.20$  in the bivariate analyses were included in robust, multiple  
14 variable models using a hierarchical approach according to a previously defined  
15 conceptual framework (Figure 1). A conceptual framework is a theoretical model that  
16 describes the hierarchical relationships between explanatory variables and an outcome.  
17 This approach is considered an appropriate strategy for assessing disease determinants  
18 in multiple variable analyses because it handles complex hierarchical inter-relationships  
19 between variables and accounts for the potential underestimation of the effects of distal  
20 determinants (i.e. factors that typically do not determine the outcome directly, but do  
21 determine by other intermediate factors)[18].  
22  
23  
24  
25  
26  
27  
28  
29  
30  
31  
32  
33  
34  
35  
36

37 The hierarchical model grouped variables in three blocks (Figure 1). Block 1  
38 contained socioeconomic variables, such as education level and race/skin color. Block 2  
39 contained behavioral variables, such as attendance to diabetes class/lectures,  
40 participation in associations of patients with diabetes, and self-perception of adherence  
41 to diet and insulin treatment. Block 3 comprised of clinical characteristics, including BMI,  
42 time since first diagnosis of diabetes, number of insulin doses per day, and frequency of  
43 self-monitoring of blood glucose, consultation with an endocrinologist, and HbA1c  
44 measurement in the previous 12 months (Figure 1).  
45  
46  
47  
48  
49  
50  
51  
52  
53  
54  
55  
56  
57  
58  
59  
60

1  
2  
3  
4  
5 A backward elimination strategy was then performed for each block. Block 1  
6  
7 variables that were significantly correlated with HbA1c serum levels at a  $p$  value  $\leq 0.05$   
8  
9 were maintained in the subsequent backward elimination model with block 2 variables.  
10  
11 Using the same approach, block 2 variables that were significantly correlated with  
12  
13 HbA1c serum levels at a  $p$  value  $\leq 0.05$  were maintained in the subsequent backward  
14  
15 elimination model with block 3 variables. Finally, block 3 variables with a  $p$  value  $\leq 0.05$   
16  
17 were defined as factors independently correlated with the HbA1c levels. Variables from  
18  
19 block 1 and block 2 that were selected to be included in following models were  
20  
21 considered to be significantly correlated with HbA1c levels, regardless of their  $p$  value in  
22  
23 the subsequent models. Sex and age were included in all models to ensure adjustments  
24  
25 to these factors at all stages of the multiple variable analyses. We used the Akaike  
26  
27 Information Criterion (AIC) to estimate the goodness of fit of the successive adjusted  
28  
29 models.  
30  
31  
32  
33  
34  
35  
36

### 37 **3. RESULTS**

38  
39 Of the 979 DM1 patients enrolled in the study, 625 (63.8%) were female, and 296  
40  
41 (30.2%) were 18-29 years of age, 412 (42.1%) 30-49 years of age, and 271 (27.7%)  $\geq 50$   
42  
43 years of age (Table 1). About half (488, 49.8%) of the patients were white, and 398  
44  
45 (40.8%) had not studied beyond the primary school level. The Southeast region of Brazil  
46  
47 accounted for 611 (62.4%) participants. Although all the diabetes centers were affiliated  
48  
49 with the Brazilian public health care system, 95 (9.7%) of the patients reported they had  
50  
51 also received private assistance during the past 12 months.  
52  
53  
54  
55  
56  
57  
58  
59  
60

TABLE 1. Sociodemographic and clinical characteristics of 979 Brazilian patients with type 1 diabetes, Brazil.

| Characteristics                                   | n (%)      |
|---------------------------------------------------|------------|
| <b>SOCIODEMOGRAPHICS</b>                          |            |
| Age (years)                                       |            |
| 18 – 29                                           | 296 (30.2) |
| 30 – 49                                           | 412 (42.1) |
| ≥ 50                                              | 271 (27.7) |
| Sex Female                                        | 625 (63.8) |
| Race/Skin color                                   |            |
| White                                             | 488 (49.8) |
| Mixed                                             | 286 (29.2) |
| Black                                             | 122 (12.5) |
| Other                                             | 83 (8.5)   |
| Education <sup>1</sup>                            |            |
| At least some College                             | 154 (15.8) |
| Secondary/High school                             | 424 (43.4) |
| Primary school or less                            | 398 (40.8) |
| Brazilian Region                                  |            |
| Southeast                                         | 611 (62.4) |
| Northeast                                         | 174 (17.8) |
| South                                             | 104 (10.6) |
| Center-west                                       | 90 (9.2)   |
| <b>CLINICAL</b>                                   |            |
| Type of service for medical care in the last year |            |
| Public                                            | 884 (90.3) |
| Private                                           | 95 (9.7)   |
| Body mass index (kg/m <sup>2</sup> ) <sup>2</sup> |            |
| <25.0                                             | 502 (52.5) |
| ≥25.0                                             | 455 (47.5) |
| <b>CLINICAL COMPLICATIONS</b>                     |            |
| Hypoglycemic episodes in the last year            | 497 (50.8) |
| Ketoacidosis hospitalization in the last year     | 248 (25.3) |
| Reported complications                            |            |
| Retinopathy                                       | 427 (43.6) |
| Neuropathy <sup>3</sup>                           | 381 (39.2) |
| Nephropathy                                       | 207 (21.1) |
| Angina <sup>4</sup>                               | 129 (13.2) |
| Vasculopathy <sup>4</sup>                         | 125 (12.8) |
| <b>LABORATORY</b>                                 |            |
| Glycated Hemoglobin (HbA1c) (%)                   |            |
| <7.0                                              | 102 (10.4) |
| 7.0 – 8.9                                         | 366 (37.4) |
| 9.0 – 10.9                                        | 287 (29.3) |
| >11.0                                             | 224 (22.9) |

<sup>1</sup> Data available for 976 patients

<sup>2</sup> Data available for 957 patients

<sup>3</sup> Data available for 973 patients

<sup>4</sup> Data available for 977 patients



1  
2  
3  
4  
5 The diabetes complications most frequently reported by the study participants  
6 were retinopathy (427, 43.6%), followed by neuropathy (381, 39.2%) and nephropathy  
7 (207, 21.1%). Episodes of ketoacidosis and hypoglycemia in the previous year were  
8 common, affecting 248 (25.3%) and 497 (50.8%) patients, respectively. The majority  
9 (887, 89.6%) of patients had inadequate glycemic control (HbA1c  $\geq$ 7.0%), and the mean  
10 HbA1c level was 9.4% (SD: 2.2%).  
11  
12  
13  
14  
15  
16  
17  
18

19 Bivariate analysis pointed to a correlation of higher levels of HbA1c with black  
20 race, lower education attainment, self-perception of fair/poor adherence to diet and to  
21 insulin treatment, not participating in diabetes class/lectures during the previous year,  
22 and never having participated in associations of patients with diabetes (Table 2). In  
23 addition, patients who reported that in the previous year had neither regular medical  
24 appointments, nor consultations with an endocrinologist, private consultations or health  
25 care delivered in the same diabetes center had significantly higher HbA1c. Finally,  
26 patients not performing regular self-monitoring of blood glucose, those with no measure  
27 of HbA1c during the previous year, and patients receiving less than four doses of insulin  
28 per day also had higher levels of HbA1c.  
29  
30  
31  
32  
33  
34  
35  
36  
37  
38  
39  
40  
41  
42  
43  
44  
45  
46  
47  
48  
49  
50  
51  
52  
53  
54  
55  
56  
57  
58  
59  
60

TABLE 2. Factors associated with glycated hemoglobin (HbA1c) levels in Brazilian patients with type 1 diabetes.

| Independent variable                                   | N° participants | HbA1c means in %<br>(SD) | $\beta$ Coefficient (CI 95%) | p value |
|--------------------------------------------------------|-----------------|--------------------------|------------------------------|---------|
| <b>BLOCK 1 – SOCIODEMOGRAPHIC</b>                      |                 |                          |                              |         |
| Age (years)                                            |                 |                          |                              |         |
| 18 – 29                                                | 296             | 9.35 (2.36)              | Ref                          | 0.198   |
| 30 – 49                                                | 412             | 9.54 (2.28)              | 0.186 (-0.146; 0.517)        |         |
| ≥ 50                                                   | 271             | 9.24 (1.95)              | -0.118 (-0.484; 0.248)       |         |
| Sex                                                    |                 |                          |                              |         |
| Male                                                   | 354             | 9.25 (2.08)              | Ref                          | 0.122   |
| Female                                                 | 625             | 9.48 (2.29)              | 0.229 (-0.061; 0.518)        |         |
| Race/Skin color                                        |                 |                          |                              |         |
| White                                                  | 488             | 9.26 (2.10)              | Ref                          | 0.058   |
| Mixed                                                  | 286             | 9.32 (2.33)              | 0.133 (-0.191; 0.456)        |         |
| Black                                                  | 122             | 9.84 (2.34)              | 0.576 (0.136; 1.017)         |         |
| Other                                                  | 83              | 9.62 (2.31)              | 0.361 (-0.155; 0.877)        |         |
| Education                                              |                 |                          |                              |         |
| At least some College                                  | 154             | 9.13 (1.82)              | Ref                          | 0.002   |
| Secondary/High school                                  | 424             | 9.21 (2.15)              | 0.084 (-0.325; 0.492)        |         |
| Primary school or less                                 | 398             | 9.70 (2.40)              | 0.565 (0.154; 0.977)         |         |
| <b>BLOCK 2 – BEHAVIORAL</b>                            |                 |                          |                              |         |
| Self-perception of adherence to diet                   |                 |                          |                              |         |
| Excellent                                              | 129             | 8.79 (2.22)              | Ref                          | <0.001  |
| Good                                                   | 327             | 9.13 (2.09)              | 0.344 (-0.103; 0.792)        |         |
| Fair / Poor                                            | 523             | 9.72 (2.25)              | 0.931 (0.508; 1.354)         |         |
| Self-perception of adherence to insulin                |                 |                          |                              |         |
| Excellent                                              | 750             | 9.28 (2.12)              | Ref                          | <0.001  |
| Good                                                   | 144             | 9.59 (2.30)              | 0.315 (-0.074; 0.703)        |         |
| Fair / Poor                                            | 62              | 10.82 (2.49)             | 1.543 (0.978; 2.107)         |         |
| Participation in lecture for diabetes in the last year |                 |                          |                              |         |
| Yes                                                    | 345             | 9.11 (2.09)              | Ref                          | <0.001  |
| No                                                     | 540             | 9.67 (2.31)              | 0.549 (0.247; 0.850)         |         |
| Participation in association of diabetics patients     |                 |                          |                              |         |
| Yes, still participate                                 | 116             | 9.09 (1.88)              | Ref                          | 0.023   |
| Yes, but no more participate                           | 124             | 9.02 (1.80)              | -0.067 (-0.627; 0.492)       |         |
| No, I never participated                               | 713             | 9.51 (2.32)              | 0.418 (-0.016; 0.851)        |         |
| <b>BLOCK 3 – CLINICAL</b>                              |                 |                          |                              |         |
| Body mass index (kg/m <sup>2</sup> )                   |                 |                          |                              |         |
| <25.0                                                  | 502             | 9.45 (2.29)              | Ref                          | 0.273   |
| ≥25.0                                                  | 455             | 9.30 (2.08)              | -0.156 (-0.435; 0.123)       |         |
| Regular medical visit in the last year                 |                 |                          |                              |         |
| Yes                                                    | 878             | 9.34 (2.19)              | Ref                          | 0.020   |
| No                                                     | 101             | 9.89 (2.42)              | 0.541 (0.084; 0.998)         |         |

|    |                                                       |     |              |                        |        |
|----|-------------------------------------------------------|-----|--------------|------------------------|--------|
| 1  |                                                       |     |              |                        |        |
| 2  | Endocrinologist visit in the last year                |     |              |                        |        |
| 3  | Yes                                                   | 800 | 9.32 (2.15)  | Ref                    | 0.014  |
| 4  | No                                                    | 177 | 9.77 (2.50)  | 0.453 (0.091; 0.814)   |        |
| 5  | Diabetes care in specialized service in the last year |     |              |                        |        |
| 6  | Yes                                                   | 661 | 9.32 (2.18)  | Ref                    | 0.120  |
| 7  | No                                                    | 318 | 9.56 (2.29)  | 0.236 (-0.061; 0.533)  |        |
| 8  | Diabetes care in private clinic in the last year      |     |              |                        |        |
| 9  | Yes                                                   | 95  | 8.87 (1.61)  | Ref                    | 0.014  |
| 10 | No                                                    | 884 | 9.46 (2.27)  | 0.586 (0.117; 1.055)   |        |
| 11 | Diabetes care in the same service                     |     |              |                        |        |
| 12 | Yes                                                   | 921 | 9.36 (2.18)  | Ref                    | 0.015  |
| 13 | No                                                    | 57  | 10.10 (2.64) | 0.735 (0.142; 1.328)   |        |
| 14 | Time since diabetes onset (years)                     |     |              |                        |        |
| 15 | < 10                                                  | 261 | 9.43 (2.66)  | Ref                    | 0.326  |
| 16 | 10 – 19                                               | 307 | 9.52 (2.11)  | 0.094 (-0.273; 0.460)  |        |
| 17 | ≥ 20                                                  | 408 | 9.27 (1.97)  | -0.115 (-0.497; 0.192) |        |
| 18 | Self-monitoring glucose                               |     |              |                        |        |
| 19 | Yes, regularly                                        | 663 | 9.25 (2.14)  | Ref                    | 0.008  |
| 20 | Yes, when decompensated                               | 160 | 9.72 (2.28)  | 0.463 (0.080; 0.845)   |        |
| 21 | No                                                    | 151 | 9.74 (2.46)  | 0.489 (0.097; 0.881)   |        |
| 22 | Number insulin doses per day                          |     |              |                        |        |
| 23 | 4 times                                               | 168 | 8.91 (1.97)  | Ref                    | 0.001  |
| 24 | 3 times                                               | 290 | 9.38 (2.10)  | 0.477 (0.062; 0.892)   |        |
| 25 | 2 times or less                                       | 505 | 9.61 (2.29)  | 0.707 (0.326; 1.088)   |        |
| 26 | Measurement HbA1c in the last year                    |     |              |                        |        |
| 27 | Yes                                                   | 533 | 9.10 (1.93)  | Ref                    | <0.001 |
| 28 | No                                                    | 184 | 10.00 (2.48) | 0.901 (0.576; 1.226)   |        |
| 29 | Do not know                                           | 261 | 9.40 (2.43)  | 0.298 (-0.070; 0.665)  |        |

---

Bivariate linear regression analyses.

1  
2  
3  
4  
5 The first multiple variable model, built with the socioeconomic variables (Model A,  
6 Table 3), showed that for each one year rise in age, HbA1c level were, on average,  
7 reduced by 0.01% ( $\beta=-0.013$ , 95% CI: -0.025, -0.002) and that education level only up to  
8 primary school was correlated with higher HbA1c levels ( $\beta=0.565$ , 95% CI: 0.154,  
9 0.977). The second multiple variable model, which combined the behavioral variables  
10 with the selected variables from model A (Model B, Table 3), found that not participating  
11 in diabetes class/lecture during the previous year ( $\beta=0.503$ , 95% CI: 0.208, 0.799) and a  
12 self-perception of fair/poor adherence to diet ( $\beta=0.889$ , 95% CI: 0.446, 1.332) and to  
13 insulin therapy ( $\beta=1.385$ , 95% CI: 0.764, 2.007) were also positively correlated with  
14 HbA1c levels. The third multiple variable model, which incorporated the clinical variables  
15 with those selected in model B (Model C, Table 3), found that not consulting at a private  
16 clinic during the previous year ( $\beta=0.545$ , 95% CI: 0.021, 1.069) and having no HbA1c  
17 measurement performed in the previous year ( $\beta=0.770$ , 95% CI: 0.418; 1.122) were  
18 positively correlated with the HbA1c levels. It is noteworthy to mention that the effect of  
19 education over HbA1c levels was reduced with the subsequent introduction of further  
20 variables from blocks 2 and 3 (Models B and C), indicating that the effect of education  
21 on glycemetic control was mediated by the behavioral and clinical variables incorporated  
22 into the model.  
23  
24  
25  
26  
27  
28  
29  
30  
31  
32  
33  
34  
35  
36  
37  
38  
39  
40  
41  
42  
43  
44  
45  
46  
47  
48  
49  
50  
51  
52  
53  
54  
55  
56  
57  
58  
59  
60

TABLE 3. Hierarchical model of multiple linear regression analyses for determinants of inadequate glycemc control in 846 Brazilian patients with type 1 diabetes.

| Independent variable                                   | Unadjusted                   | Model A                      | Model B                      | Model C                      |
|--------------------------------------------------------|------------------------------|------------------------------|------------------------------|------------------------------|
|                                                        | $\beta$ coefficient (95% IC) |
| <b>BLOCK 1: SOCIODEMOGRAPHIC</b>                       |                              |                              |                              |                              |
| Age (years)                                            | -0.003 (-0.012; 0.007)       | -0.013 (-0.025; -0.002)      | -0.008 (-0.019; 0.002)       | -0.009 (-0.020; 0.001)       |
| Sex                                                    |                              |                              |                              |                              |
| Male                                                   | Ref                          | Ref                          | Ref                          | Ref                          |
| Female                                                 | 0.229 (-0.061; 0.518)        | 0.243 (-0.065; 0.551)        | 0.311 (0.012; 0.610)         | 0.286 (-0.009; 0.582)        |
| Education                                              |                              |                              |                              |                              |
| At least some College                                  | Ref                          | Ref                          | Ref                          | Ref                          |
| Secondary/High school                                  | 0.084 (-0.325; 0.492)        | 0.141 (-0.288; 0.572)        | 0.081 (-0.336; 0.499)        | -0.254 (-0.709; 0.199)       |
| Primary school or less                                 | 0.565 (0.154; 0.977)         | 0.765 (0.313; 1.217)         | 0.551 (0.106; 0.996)         | 0.090 (-0.409; 0.590)        |
| <b>BLOCK 2: BEHAVIORAL</b>                             |                              |                              |                              |                              |
| Self-perception of adherence to diet                   |                              |                              |                              |                              |
| Excellent                                              | Ref                          |                              | Ref                          | Ref                          |
| Good                                                   | 0.344 (-0.103; 0.792)        |                              | 0.401 (-0.062; 0.866)        | 0.377 (-0.081; 0.836)        |
| Fair / Poor                                            | 0.931 (0.508; 1.354)         |                              | 0.889 (0.446; 1.332)         | 0.876 (0.439; 1.313)         |
| Self-perception of adherence to insulin                |                              |                              |                              |                              |
| Excellent                                              | Ref                          |                              | Ref                          | Ref                          |
| Good                                                   | 0.315 (-0.074; 0.703)        |                              | 0.295 (-0.112; 0.702)        | 0.239 (-0.164; 0.642)        |
| Fair / Poor                                            | 1.543 (0.978; 2.107)         |                              | 1.385 (0.764; 2.007)         | 1.242 (0.625; 1.858)         |
| Participation in lecture for diabetes in the last year |                              |                              |                              |                              |
| Yes                                                    | Ref                          |                              | Ref                          | Ref                          |
| No                                                     | 0.549 (0.247; 0.850)         |                              | 0.503 (0.208; 0.799)         | 0.482 (0.184; 0.779)         |
| <b>BLOCK 3: CLINICAL</b>                               |                              |                              |                              |                              |
| Diabetes care in private clinic in the last year       |                              |                              |                              |                              |
| Yes                                                    | Ref                          |                              |                              | Ref                          |
| No                                                     | 0.586 (0.117; 1.055)         |                              |                              | 0.545 (0.021; 1.069)         |
| Measurement HbA1c in the last year                     |                              |                              |                              |                              |
| Yes                                                    | Ref                          |                              |                              | Ref                          |
| No                                                     | 0.901 (0.576; 1.226)         |                              |                              | 0.770 (0.418; 1.122)         |
| Do not know                                            | 0.298 (-0.070; 0.665)        |                              |                              | 0.243 (-0.170; 0.657)        |
| AIC*:                                                  | Not Applicable               | 3,735.893                    | 3,685.672                    | 3,666.879                    |

Note: Model A shows associations between sociodemographic factors (block 1) and the levels of glycated hemoglobin (HbA1c). Model B shows associations between sociodemographic and behavioral factors (blocks 1 and 2) and HbA1c levels. Model C shows associations between sociodemographic, behavioral, and clinical factors (blocks 1, 2 and 3), and HbA1c levels. \*Akaike Information Criteria.

#### 4. DISCUSSION

Our results indicate that sociodemographic, behavioral and clinical factors in DM1 patients are independently associated with high levels of HbA1c. Of note, self-reported poor adherence to diet was strongly associated with elevated HbA1c levels. This finding is of special relevance because adherence to diet is a modifiable factor, possibly accomplished by specific actions targeting those noncompliant to dietary recommendations. These findings add valuable information for a better understanding of the barriers to achieve adequate glycemic control in adult patients with DM1.

The American Diabetes Association (ADA) recommends that patients with a recent diagnosis of diabetes and without major complications or prior history of severe hypoglycemic episodes should target HbA1c levels of <6.5%, while patients with advanced micro and macrovascular complications or comorbidities aim towards HbA1c levels of <8.0%[5]. This recommendation is supported by studies conducted over two decades ago, showing that poor glycemic control is associated with microvascular and macrovascular complications in patients with diabetes[4,5]. Despite that, the majority of DM1 patients worldwide have inadequate glycemic control[7,19,20]. In our study, we found that the mean HbA1c level was 9.4%, the same result observed in another multicenter, DM1 study, conducted in 20 Brazilian cities between 2008 and 2010[10]. This study also found that the quality of life of DM1 patients was inversely related to the levels of HbA1c.

In our multiple variable model including only the sociodemographic variables, we found that patients whose highest level of educational attainment was primary school had a mean level of HbA1c 0.77% greater than patients with at least some college level

1  
2  
3  
4 education. The relation between lower educational attainment of DM1 patients and  
5  
6 higher levels of HbA1c has been previously reported[7,12]. However, a noteworthy  
7  
8 finding of our study is that the correlation coefficient between educational levels and  
9  
10 HbA1c levels decreased after we incorporated the behavioral variables (Model B) and  
11  
12 almost disappeared when the clinical factors were included (Model C). The differences  
13  
14 observed in the education level correlation coefficients among these models indicate  
15  
16 that the effect of lower education on the level of HbA1c is possibly mediated by  
17  
18 behavioral (adherence to diet and insulin, and participation in lecture for diabetes in the  
19  
20 last year) and, especially, by clinical factors (attendance to private clinics and  
21  
22 measurement of HbA1c, both in the year before). This original finding is of relevance  
23  
24 because it highlights that the influence of lower education on inadequate glycemic  
25  
26 control can be surpassed if DM1 patients have good adherence to diet and treatment,  
27  
28 and if receive proper monitoring of HbA1c levels.  
29  
30  
31  
32  
33  
34

35  
36 Regarding the behavioral factors, we found that participation in diabetes  
37  
38 education programs was associated with better glycemic control, consistent with  
39  
40 previous studies. In a case-control study conducted in Saudi Arabia, patients with DM1  
41  
42 or DM2 who had received monthly counseling about the disease, had significantly  
43  
44 reduced HbA1c levels compared to those who had received counseling only at the  
45  
46 beginning of the study[21]. In another single-arm, pre-post cohort study, aiming to  
47  
48 estimate the impact of improving the knowledge, skills and confidence in self-  
49  
50 management of DM1, the average HbA1c levels was significantly reduced from baseline  
51  
52 to follow-up measurements[22]. The mechanisms by which diabetes education programs  
53  
54 help achieve a better glycemic control are likely diverse, and may include provision of  
55  
56  
57  
58  
59  
60

1  
2  
3  
4 knowledge about the disease, aid in developing skills and techniques for disease self-  
5 management, and support for adoption of healthy eating and lifestyle habits. Our  
6 findings reinforce the importance of policies and practices that challenge the traditional  
7 medical care of DM1 and include educational activities to empower patients to achieve  
8 goals for glycemic control.  
9

10  
11  
12  
13  
14  
15  
16 A lower degree of self-perceived adherence to diet and insulin therapy were also  
17 strongly associated with higher levels of HbA1c among our study patients. These  
18 findings are in accordance with other studies of DM1 patients, in which the average  
19 HbA1c was significantly lower among patients who followed dietary recommendations,  
20 compared to those who did not[14,23]. A study that enrolled both DM1 and DM2, insulin-  
21 treated patients also found after adjusting for confounders that better glycemic control  
22 was associated with adherence to a dietary plan that included greater daily ingestion of  
23 fruits and vegetables, but not with adherence to insulin therapy[19]. However, Gastal et  
24 al.[24] found that better scores in a diabetes self-care scale evaluating diabetes general  
25 management, diet, exercise, care with feet, glycemic monitoring, insulin administration,  
26 and detection, prevention or treatment of hypoglycemia/hyperglycemia were associated  
27 with lower HbA1c values. Thus, additional evidence supports our findings that  
28 adherence to both diet and insulin regimens are essential for glycemic control and for  
29 subsequent prevention of disease complications and early death. We recommend that  
30 health professional involved in DM1 care devote substantive efforts to motivate patients  
31 to follow diet recommendations and treatment prescriptions. Whenever possible, they  
32 should try to simplify the treatment regimen and work to guarantee a proper  
33 understanding of their patients about the disease and its management. Further  
34  
35  
36  
37  
38  
39  
40  
41  
42  
43  
44  
45  
46  
47  
48  
49  
50  
51  
52  
53  
54  
55  
56  
57  
58  
59  
60



1  
2  
3  
4 observational studies, aiming to identify factors that influence adherence to both diet and  
5  
6 insulin, are warranted. In addition, experimental trials should compare the efficacy of  
7  
8 different strategies to improve patients' compliance to diet and treatment. Such  
9  
10 strategies may include different motivational approaches to improve adherence, as well  
11  
12 as the use of different insulin delivery devices.  
13  
14

15  
16 Unfortunately, we did not collect detailed data on diet and food consumption,  
17  
18 which would allow a better understanding of its role on glycemic control. Even though,  
19  
20 our finding of an inverse relation between the degree of self-perceived adherence to diet  
21  
22 and HbA1c levels suggests that following specific alimentary recommendations have a  
23  
24 direct contribution to glycemic control. Several actions may help reinforcing the role of  
25  
26 diet adherence to glycemic control, such as a close follow up by a multidisciplinary  
27  
28 health team (including nutritionists, social assistants, psychologists, and other  
29  
30 professionals), provision of patients' education, spouse and family support, encouraging  
31  
32 diet adherence[25], and the use of digital media and electronic devices, such as smart  
33  
34 phone self-care "apps"[26].  
35  
36  
37  
38  
39

40 Some studies suggest that DM1 patients undergoing close monitoring of diabetes  
41  
42 through regular HbA1c measurements, blood glucose self-monitoring, and regular  
43  
44 medical appointments, had lower levels of HbA1c[13,27,28]. We found in bivariate  
45  
46 analysis, but not in multiple variable analyses, that those self-monitoring blood glucose  
47  
48 on a regular basis had lower HbA1c levels. The failure of our multiple variable analyses  
49  
50 to show this association may derive from the method that we used to obtain data on  
51  
52 blood glucose self-monitoring, which was self-reported, not relying on diaries or other  
53  
54 more accurate sources to quantify the daily frequency of self-monitoring in a typical day.  
55  
56  
57  
58  
59  
60

1  
2  
3  
4 However, our finding that patients who did not measure the HbA1c level in the previous  
5 year had greater levels of HbA1c, even after adjustment for other variables, does  
6 support the notion that a careful disease monitoring is critical for an adequate glycaemic  
7 control. Thus, regular monitoring of glycaemic levels should be an essential chapter of  
8 policies and programs designed to provide improved care for DM1 patients.  
9

10  
11  
12  
13  
14  
15  
16 We also found that patients who had not received diabetes medical care at  
17 private services presented significantly higher HbA1c levels than those who had. This  
18 result raises concerns because the Brazilian public health system provides universal  
19 medical care for the majority of the population with diabetes in the country. Training the  
20 public health professionals for diabetes care and ensuring better infrastructure and  
21 access to universal assistance for patients with diabetes are critical collective actions  
22 that need to be attained in order to decrease the high percentage of DM1 patients with  
23 inadequate glycaemic control. Specific actions may include providing multidisciplinary  
24 professional teams for diabetes care, and increasing access to the most advanced  
25 insulin therapies, such as insulin pump, and to self-monitoring of blood glucose. Use of  
26 insulin pumps in Brazil is not covered by the public national health system and it is  
27 incipient even for patients treated at private health services because insulin pumps are  
28 not produced in the country and the imported product is sold at an unaffordable price  
29 (>US\$ 4,000.00)[29,30].  
30  
31  
32  
33  
34  
35  
36  
37  
38  
39  
40  
41  
42  
43  
44  
45  
46  
47  
48

49 This study has some limitations. First, the cross-sectional design does not allow  
50 for establishing a temporal relation between the factors associated with high levels of  
51 HbA1c. Therefore, a thorough follow-up of DM1 patients through a cohort study is  
52 warranted and may help elucidate whether the factors we found to be associated with  
53  
54  
55  
56  
57  
58  
59  
60

1  
2  
3  
4 higher HbA1c levels are causally related to poor glycemic control. Second, except for  
5  
6 the HbA1c measurement, all the patients' data, including the behavioral and clinical  
7  
8 characteristics were collected through interviews, potentially introducing a certain degree  
9  
10 of inaccuracy for some answers. However, interviews are widely used in epidemiological  
11  
12 and clinical studies of diabetes and our results are consistent with those of previous  
13  
14 studies that used self-reported answers [10]. In addition, self-reported data have been  
15  
16 shown to have high agreement with medical records for several questions, such as type  
17  
18 of diabetes, family history of diabetes, therapeutic regimen and disease  
19  
20 complications[31]. Although inaccurate answers on type of diabetes might have led to  
21  
22 inclusion of some insulin-treated DM2 patients in the study population, we expect this  
23  
24 number to be small, having minimal impact on our findings and conclusions. Third,  
25  
26 typical DM1 onset happens during childhood and adolescence, but our study sample  
27  
28 only included patients  $\geq 18$  years of age and was obtained in reference diabetes care  
29  
30 centers. Therefore, we might have introduced a selection bias, with participants likely  
31  
32 having a longer disease duration, a greater number of complications and, possibly,  
33  
34 worse glycemic control. In addition, the study patients were not randomly selected.  
35  
36 However, as the DM1 patients sample was consecutively enrolled during 30 days in 20  
37  
38 diabetes centers from ten large cities in four different regions of Brazil, it is reasonable to  
39  
40 assume that the factors associated with a poor glycemic control among the studied  
41  
42 patients can be generalized to patients with DM1 seeking care in large urban centers in  
43  
44 the country. On the other hand, in our study we measured the HbA1c levels for all  
45  
46 participants in a single laboratory, and used the same reference method of liquid  
47  
48  
49  
50  
51  
52  
53  
54  
55  
56  
57  
58  
59  
60

1  
2  
3  
4 chromatography, thus avoiding problems with lack of standardization reported by other  
5  
6 authors.  
7

8  
9 In summary, our findings support the concept that multiple and distinct factors,  
10 such as sociodemographic, behavioral and clinical drivers, act together to influence the  
11 glycemic control in DM1 patients. Encouraging patients' adherence to diet and to insulin  
12 treatment is critical for achieving optimum levels of HbA1c. Health education programs  
13 to inform and engage patients in their treatment, as well as ensuring periodic medical  
14 monitoring and measurement of HbA1c, are important additional measures. Reinforcing  
15 these recommendations for public health policies and clinical guidelines may translate  
16 into improved glycemic control in DM1 patients.  
17  
18  
19  
20  
21  
22  
23  
24  
25  
26  
27  
28  
29  
30  
31  
32

### 33 **ACKNOWLEDGEMENTS**

34  
35 The study was supported by an unconditional grant from Pfizer Inc. The authors would  
36 like to thank the team members in the collection of blood samples, interviews with  
37 patients and performing HbA1c tests, and the study investigators: Adriana C. Forti, MD;  
38 Ana B. V. Mendes, MD; Antônio R. Chacra, MD; Celio C. Borges, MD; Debora V.  
39 Soares, MD; Edson P. Brum, MD; Elza M. S. Constantino, MD; Francisco A. Oliveira,  
40 MD; Freddy Eliaschewitz, MD; Hermelinda Pedrosa, MD; João A. S. Fittipaldi, MD;  
41 Jorge Gross, MD; Jose E. P. Oliveira, MD; Lucia Cordeiro, MD; Lucia P. E. Souza, MD;  
42 Marcia Nery, MD; Marcos Tambascia, MD; Maria C. C. de Almeida, PhD; Maria R.  
43 Calsolari, MD; Reinaldo B. M. Machado, MD; Reine Chaves, MD; Rosane Kupfer, MD;  
44 Ruy Lyra, MD; Saulo Cavalcante, MD; and Silmara Leite, MD. We also thank Professor  
45  
46  
47  
48  
49  
50  
51  
52  
53  
54  
55  
56  
57  
58  
59  
60

1  
2  
3  
4  
5  
6  
7  
8  
9  
10  
11  
12  
13  
14  
15  
16  
17  
18  
19  
20  
21  
22  
23  
24  
25  
26  
27  
28  
29  
30  
31  
32  
33  
34  
35  
36  
37  
38  
39  
40  
41  
42  
43  
44  
45  
46  
47  
48  
49  
50  
51  
52  
53  
54  
55  
56  
57  
58  
59  
60

Uriel Kitron for his valuable review of the manuscript. Carine S. Andrade received scholarship from the Coordination for the Improvement of Higher Education Personnel (CAPES), Brazilian Ministry of Education. Guilherme S. Ribeiro and Edson D. Moreira Jr. received scholarships from the National Council for Scientific and Technological Development (CNPq).

### **CONFLICT OF INTEREST**

Carine S. Andrade has no conflicts of interest; Guilherme S. Ribeiro has no conflicts of interest; Carlos A.S.T. Santos has no conflicts of interest; Raimundo Celestino S. Neves has no conflicts of interest; Edson D. Moreira Jr. was a consultant for Pfizer Inc.

### **AUTHOR CONTRIBUTIONS**

Conceived and designed the experiments: Edson D Moreira Jr; Carine S Andrade; Guilherme S Ribeiro. Analysis and interpretation of data: Carine S Andrade; Guilherme S Ribeiro; Carlos AST Santos; Raimundo Celestino S Neves; Edson D Moreira Jr. Wrote the paper: Carine S Andrade; Guilherme S Ribeiro. Reviewed and approved the final version of the manuscript: Carine S Andrade; Guilherme S Ribeiro; Carlos AST Santos; Raimundo Celestino S Neves; Edson D Moreira Jr.

### **AVAILABILITY OF DATA AND MATERIALS**

The datasets analyzed during the current study may be available from the corresponding author on reasonable request.

## FUNDING

The Brazilian Study of Diabetes Control was funded by Pfizer Inc., Brazil.

## REFERENCE

- 1 Drouin P, Blickle JF, Charbonnel B, *et al.* Diagnosis and classification of diabetes mellitus. *Diabetes Care* 2010;33 Suppl 1:S62-9. doi:10.2337/dc10-S062
- 2 Diaz-Valencia PA, Bougnères P, Valleron A-J. Global epidemiology of type 1 diabetes in young adults and adults: a systematic review. *BMC Public Health* 2015;15:255. doi:10.1186/s12889-015-1591-y
- 3 Tuomilehto J. The Emerging Global Epidemic of Type 1 Diabetes. *Curr Diab Rep* 2013;13:795–804. doi:10.1007/s11892-013-0433-5
- 4 DCCT. The New England Journal of Medicine Downloaded from nejm.org at FIOCRUZ on January 7, 2015. For personal use only. No other uses without permission. Copyright © 1993 Massachusetts Medical Society. All rights reserved. *N Engl J Med* 1993;329:977–86. <http://www.nejm.org/doi/pdf/10.1056/NEJM199309303291401>
- 5 George Bakris M, Lawrence Blonde, MD F, Andrew J.M. Boulton M, *et al.* Standards of Medical Care in Diabetes - 2015. *Diabetes Care J Clin Appl Res Educ* 2015;38:S1–99. doi:10.2337/dc15-S005
- 6 McCarthy M, Funk M, Grey M. Ideal Cardiovascular Health in Adults with Type 1 Diabetes. *Nurs Res* 2016;65:E65–E65 1/3p. doi:10.1016/j.ypmmed.2016.08.019
- 7 Sastre J, Pines PJ, Moreno J, *et al.* Situacion de control metabolico y pautas de tratamiento en pacientes con diabetes tipo 1 en Castilla-La Mancha: estudio de diabetes tipo 1 en Castilla-La Mancha. *Endocrinol y Nutr* 2012;59:539–46. doi:10.1016/j.endonu.2012.07.003
- 8 Moreira ED, Neves RCS, Nunes ZO, *et al.* Glycemic control and its correlates in patients with

- 1  
2  
3  
4 diabetes in Venezuela: Results from a nationwide survey. *Diabetes Res Clin Pract* 2010;87:407–  
5  
6 14. doi:10.1016/j.diabres.2009.12.014  
7  
8  
9 9 Mendes ABV, Fittipaldi JAS, Neves RCS, *et al.* Prevalence and correlates of inadequate glycaemic  
10 control: results from a nationwide survey in 6,671 adults with diabetes in Brazil. *Acta Diabetol*  
11 2010;47:137–45. doi:10.1007/s00592-009-0138-z  
12  
13  
14  
15 10 Braga de Souza ACC, Felício JS, Koury CC, *et al.* Health-related quality of life in people with type  
16 1 Diabetes Mellitus: data from the Brazilian Type 1 Diabetes Study Group. *Health Qual Life*  
17 *Outcomes* 2015;13:204. doi:10.1186/s12955-015-0396-0  
18  
19  
20  
21  
22 11 Paris CA, Imperatore G, Klingensmith G, *et al.* Predictors of Insulin Regimens and Impact on  
23 Outcomes in Youth with Type 1 Diabetes: The SEARCH for Diabetes in Youth Study. *J Pediatr*  
24 2009;155:183–189.e1. doi:10.1016/j.jpeds.2009.01.063  
25  
26  
27  
28  
29 12 Nádas J, Putz Z, Fövényi J, *et al.* Cardiometabolic risk and educational level in adult patients with  
30 type 1 diabetes. *Acta Diabetol* 2009;46:159–62. doi:10.1007/s00592-008-0065-4  
31  
32  
33  
34 13 Pfützner A, Weissmann J, Mougialakou S, *et al.* Glycemic Variability Is Associated with Frequency  
35 of Blood Glucose Testing and Bolus: Post Hoc Analysis Results from the ProAct Study. *Diabetes*  
36 *Technol Ther* 2015;17:150303065452008. doi:10.1089/dia.2014.0278  
37  
38  
39  
40 14 Davison K a K, Negrato C a, Cobas R, *et al.* Relationship between adherence to diet, glycaemic  
41 control and cardiovascular risk factors in patients with type 1 diabetes: a nationwide survey in  
42 Brazil. *Nutr J* 2014;13:19. doi:10.1186/1475-2891-13-19  
43  
44  
45  
46 15 Petitti DB, Klingensmith GJ, Bell RA, *et al.* Glycemic Control in Youth with Diabetes: The SEARCH  
47 for Diabetes in Youth Study. *J Pediatr* 2009;155:668–672.e3. doi:10.1016/j.jpeds.2009.05.025  
48  
49  
50  
51 16 Patterson C, Guariguata L, Dahlquist G, *et al.* Diabetes in the young – a global view and worldwide  
52 estimates of numbers of children with type 1 diabetes. *Diabetes Res Clin Pract* 2014;103:161–75.  
53 doi:10.1016/j.diabres.2013.11.005  
54  
55  
56  
57  
58 17 Bailey K V., Ferro-Luzzi A. Use of body mass index of adults in assessing individual and  
59  
60

- 1  
2  
3  
4  
5  
6  
7  
8  
9  
10  
11  
12  
13  
14  
15  
16  
17  
18  
19  
20  
21  
22  
23  
24  
25  
26  
27  
28  
29  
30  
31  
32  
33  
34  
35  
36  
37  
38  
39  
40  
41  
42  
43  
44  
45  
46  
47  
48  
49  
50  
51  
52  
53  
54  
55  
56  
57  
58  
59  
60
- community nutritional status. *Bull World Health Organ* 1995;73:673–8.
- 18 Victora CG, Huttly SR, Fuchs SC, *et al.* The role of conceptual frameworks in epidemiological analysis: a hierarchical approach. *Int J Epidemiol* 1997;26:224–7. doi:10.1093/ije/26.1.224
- 19 Angamo MT, Melese BH, Ayen WY. Determinants of glycemic control among insulin treated diabetic patients in Southwest Ethiopia: hospital based cross sectional study. *PLoS One* 2013;8:e61759. doi:10.1371/journal.pone.0061759
- 20 Colom C, Chico A, Carreras G, *et al.* Control glucémico y complicaciones crónicas a 20 años del comienzo de la diabetes tipo 1. Resultados de una unidad especializada. *Av en Diabetol* 2015;31:113–9. doi:10.1016/j.avdiab.2015.02.002
- 21 Ba-Essa E, Mobarak E. Intensified glucose self-monitoring with education in Saudi DM patients. *Int J ...* 2015;8:19374–80. <http://www.ncbi.nlm.nih.gov/pmc/articles/PMC4694478/>
- 22 Speight J, Holmes-Truscott E, Harvey DM, *et al.* Structured type 1 diabetes education delivered in routine care in Australia reduces diabetes-related emergencies and severe diabetes-related distress: The OzDAFNE program. *Diabetes Res Clin Pract* 2016;112:65–72. doi:10.1016/j.diabres.2015.11.002
- 23 Mehta SN, Volkening LK, Andreson BJ *et al.* Dietary behaviors predict glycemic control in youth with type 1 diabetes. *Diabetes Care* 2008;31:1318–20. <http://care.diabetesjournals.org/content/31/7/1318.full.pdf+html>
- 24 Gastal DA, Pinheiro RT, Vazquez DP. Self-efficacy scale for Brazilians with type 1 diabetes. *Sao Paulo Med J* 2007;125:96–101. <http://www.ncbi.nlm.nih.gov/pubmed/17625707>
- 25 Leong A, Rahme E, Dasgupta K. Spousal diabetes as a diabetes risk factor: a systematic review and meta-analysis. *BMC Med* 2014;12:12. doi:10.1186/1741-7015-12-12
- 26 Joshi R, Joshi D, Cheriya P. Improving adherence and outcomes in diabetic patients. *Patient Prefer Adherence* 2017;11:271–5. doi:10.2147/PPA.S122490
- 27 Miller KM, Beck RW, Bergenstal RM, *et al.* Evidence of a Strong Association Between Frequency



1  
2  
3  
4 of Self-Monitoring of Blood Glucose and Hemoglobin A1c Levels in T1D Exchange Clinic Registry  
5  
6 Participants. *Diabetes Care* 2013;36:2009–14. doi:10.2337/dc12-1770  
7

8  
9 28 Jin S-M, Baek JH, Suh S, *et al.* Factors Associated with Greater Benefit of a National  
10 Reimbursement Policy for Blood Glucose Test Strips in Adult Patients with Type 1 Diabetes: A  
11 Prospective Cohort Study. *J Diabetes Investig* 2017;:0–2. doi:10.1111/jdi.12728  
12  
13

14  
15 29 Minicucci WJ. Uso de bomba de infusão subcutânea de insulina e suas indicações. *Arq Bras*  
16 *Endocrinol Metabol* 2008;52:340–8. doi:10.1590/S0004-27302008000200022  
17  
18

19  
20 30 Cocolo AC. Bomba de insulina nacional facilitará controle do diabetes tipo 1. *Entre Teses*  
21 2017;8:38–41. [http://www.unifesp.br/reitoria/dci/entreteses/item/2854-bomba-de-insulina-nacional-](http://www.unifesp.br/reitoria/dci/entreteses/item/2854-bomba-de-insulina-nacional-facilitara-controle-do-diabetes-tipo-1)  
22 [facilitara-controle-do-diabetes-tipo-1](http://www.unifesp.br/reitoria/dci/entreteses/item/2854-bomba-de-insulina-nacional-facilitara-controle-do-diabetes-tipo-1)  
23  
24

25  
26 31 Løvaas KF, Cooper JG, Sandberg S, *et al.* Feasibility of using self-reported patient data in a  
27 national diabetes register. *BMC Health Serv Res* 2015;15:553. doi:10.1186/s12913-015-1226-0  
28  
29  
30  
31  
32  
33  
34  
35  
36  
37  
38  
39  
40  
41  
42  
43  
44  
45  
46  
47  
48  
49  
50  
51  
52  
53  
54  
55  
56  
57  
58  
59  
60

1  
2  
3  
4  
5  
6  
7  
8  
9  
10  
11  
12  
13  
14  
15  
16  
17  
18  
19  
20  
21  
22  
23  
24  
25  
26  
27  
28  
29  
30  
31  
32  
33  
34  
35  
36  
37  
38  
39  
40  
41  
42  
43  
44  
45  
46  
47  
48  
49  
50  
51  
52  
53  
54  
55  
56  
57  
58  
59  
60

FIGURE 1. Hierarchical model for determinants of high levels of glycated hemoglobin in patients with type 1 diabetes.

For peer review only

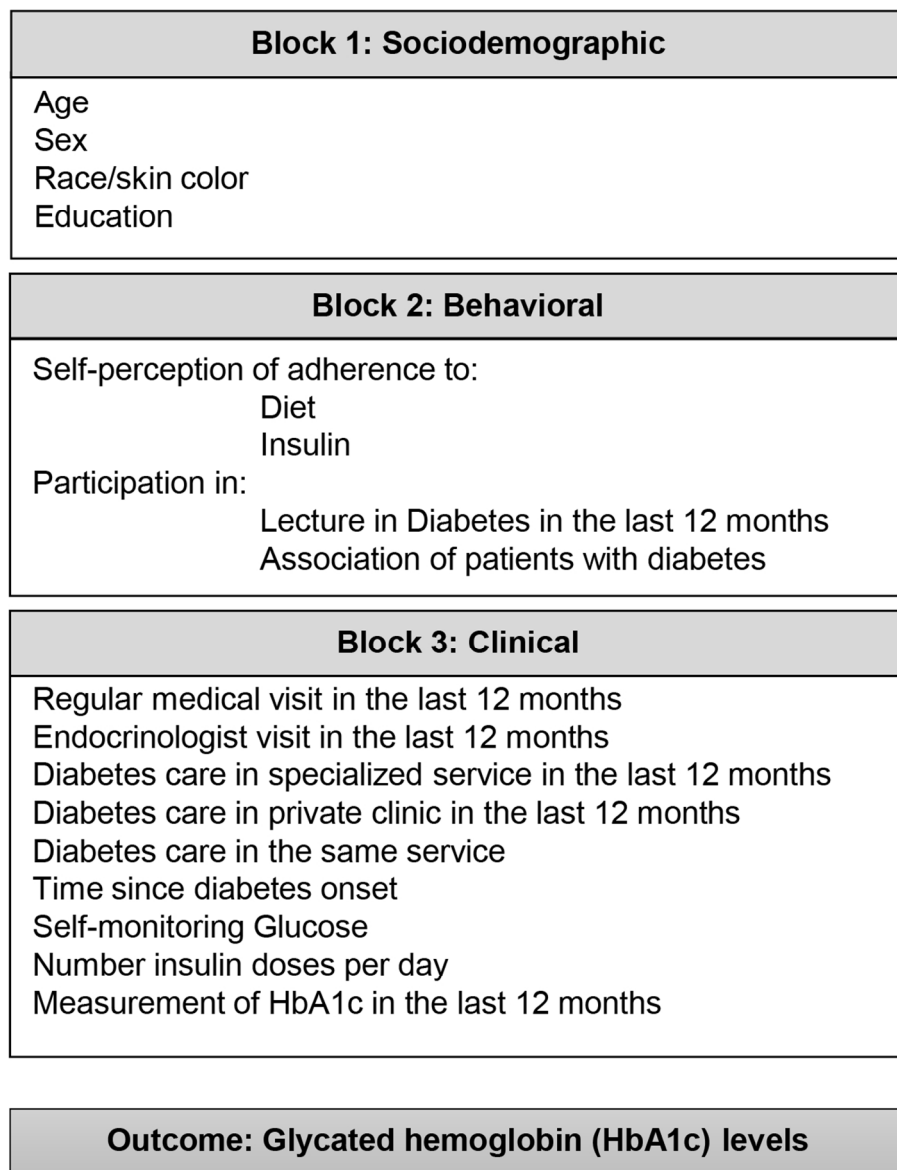

FIGURE 1. Hierarchical model for determinants of high levels of glycated hemoglobin in patients with type 1 diabetes.

103x133mm (300 x 300 DPI)

# NATIONAL DIABETES RESEARCH

|                    |               |                                   |
|--------------------|---------------|-----------------------------------|
| Interviewer: _____ |               | Interview date: ___ / ___ / _____ |
| City: _____        | Center: _____ | Record #: [ TAG ]                 |

## SECTION A: PERSONAL INFORMATION

- A1. How old are you?**   years old
- A2. [MARK ANSWER WITHOUT ASKING]:**     1. (    ) Male                                    2. (    ) Female
- A3. What is yours marital status?**
- 1. (    ) Single
  - 2. (    ) Married
  - 3. (    ) Divorced
  - 4. (    ) Widower
  - 5. (    ) Living with a partner
- A4. What is your skin color (race/ethnicity)?**
- 1. (    ) White
  - 2. (    ) Mixed
  - 3. (    ) Black
  - 4. (    ) Asian
  - 5. (    ) Other (specify) \_\_\_\_\_
- A5. What is your educational attainment? [ILLITERATE: SCORE "0"]**
- 1. I studied up to   grade, or
  - 2. (    ) Secondary/High school or
  - 3. (    ) At least some College
  - 4. (    ) Primary school or less
- A6. What is your current working situation?**
- 1. (    ) Full-time or part-time work
  - 2. (    ) Retired or pensioner
  - 3. (    ) Unemployed
  - 4. (    ) Medical license due to illness or physical disability
  - 5. (    ) Housewife
  - 6. (    ) Student
  - 7. (    ) Does not work

## SECTION B: DATA ON HEALTH HISTORY AND LIFE HABITS

- B1. What is your height?**     ,   m
- B2. How much do you weigh?**       ,  Kg
- B3. Has any doctor ever told you that you have or have had any of these problems....?**
- |                                                                                                                                        | (Yes) | (No)  | (Do not know) |
|----------------------------------------------------------------------------------------------------------------------------------------|-------|-------|---------------|
| <b>B3a. Angina or heart attack (chest pain).....</b>                                                                                   | ( Y ) | ( N ) | ( DNK )       |
| <b>B3b. Change in the fundus of the eye (or have had a laser treatment), cataracts, or significant loss or decrease in vision.....</b> | ( Y ) | ( N ) | ( DNK )       |
| <b>B3c. Renal function impairment (kidney disease).....</b>                                                                            | ( Y ) | ( N ) | ( DNK )       |
| <b>B3d. Neuropathy / neuritis (numbness, "twinges" in the legs / feet).....</b>                                                        | ( Y ) | ( N ) | ( DNK )       |
| <b>B3e. Peripheral vasculopathy ("diabetic foot", chronic leg ulcers / sores).....</b>                                                 | ( Y ) | ( N ) | ( DNK )       |
| <b>B3f. Stroke .....</b>                                                                                                               | ( Y ) | ( N ) | ( DNK )       |
| <b>B3g. Other (What? _____).....</b>                                                                                                   | ( Y ) | ( N ) | ( DNK )       |

# NATIONAL DIABETES RESEARCH

B4. Do you have other family members with diabetes (parents, grandparents, children, siblings)? ( Y ) ( N ) (DNK )

B5. Compared to other people your age, you would say that your level of physical activity is:

1. ( ) Less than most people
2. ( ) Same as most people
3. ( ) More than most people

## SECTION C: DIABETES DATA (TYPE, TREATMENT AND CONTROL)

C1. What was your age when your diabetes was diagnosed?   years old

C2. What type of diabetes is it?

1. ( ) Type 1 (usually starts at a young age, almost always without previous cases of diabetes in the family, and treated with insulin)
2. ( ) Type 2 (usually begins at age 40 years or more, associated with obesity, often with previous cases in the family and treated with oral medication associated or not with insulin)
3. ( ) Gestational (occurred during pregnancy)

C3. Indicate which treatment(s) you currently use:

C3.1. Do you follow a specific diet?

1. ( ) NO [GO TO C3.2]
2. ( ) YES

C3.1a. Honestly, how would you say it is your diet adherence? [READ ALL OPTIONS]

1. [ ] Poor (I never follow the diet)
2. [ ] Bad (I rarely follow the diet)
3. [ ] Regular (Sometimes I follow the diet)
4. [ ] Good (I almost always follow the diet)
5. [ ] Excellent (I always follow the diet)

C3.2. Do you use oral medication for diabetes?

1. ( ) NO [GO TO C3.3]
2. ( ) YES. Which are they?

SIGN THE TIME (S) YOU TAKE MEDICATION:

|              | <u>Breakfast</u>     | <u>Lunch</u>         | <u>Dinner</u>        | <u>Before bed / at night</u> |
|--------------|----------------------|----------------------|----------------------|------------------------------|
| C3.2a. _____ | <input type="text"/> | <input type="text"/> | <input type="text"/> | <input type="text"/>         |
| C3.2b. _____ | <input type="text"/> | <input type="text"/> | <input type="text"/> | <input type="text"/>         |
| C3.2c. _____ | <input type="text"/> | <input type="text"/> | <input type="text"/> | <input type="text"/>         |

C3.2d. Honestly, how would you say that is your adherence to the use of medication? [READ ALL OPTIONS]

1. [ ] Poor (I use medication only when I feel bad)
2. [ ] Bad (I use medication very irregularly)
3. [ ] Regular (Sometimes I forget / stop taking the medication)
4. [ ] Good (I rarely forget / stop taking the medication)
5. [ ] Excellent (I almost never forget / stop taking the medication)

C3.3. Do you use insulin?

1. ( ) NO [GO TO C4]
3. ( ) YES Which type (s) of insulin?

SIGN THE TIME (S) YOU TAKE MEDICATION

|              | <u>Breakfast</u>     | <u>Lunch</u>         | <u>Dinner</u>        | <u>Before bed / at night</u> |
|--------------|----------------------|----------------------|----------------------|------------------------------|
| C3.3a. _____ | <input type="text"/> | <input type="text"/> | <input type="text"/> | <input type="text"/>         |
| C3.3b. _____ | <input type="text"/> | <input type="text"/> | <input type="text"/> | <input type="text"/>         |
| C3.3c. _____ | <input type="text"/> | <input type="text"/> | <input type="text"/> | <input type="text"/>         |

C3.3d. Honestly, how would you say that is your adherence to the use of insulin? [READ ALL OPTIONS]

1. [ ] Poor (I use insulin only when I feel bad)
2. [ ] Bad (I use insulin very irregularly)
3. [ ] Regular (Sometimes I forget / stop taking insulin)
4. [ ] Good (I rarely forget / stop taking insulin)
5. [ ] Excellent (I almost never forget / stop taking insulin)

C4. Currently, what test (s) do you use to evaluate your diabetes control:

# NATIONAL DIABETES RESEARCH

## C4.1. Capillary blood glucose test (droplet of blood from the tip of the finger)?

1. ( ) No
2. ( ) Yes, occasionally (when I feel bad, or when I go to the doctor's office, etc.)
3. ( ) Yes, regularly. **C4.1a. How many times do you do the test?** |\_\_|\_\_| per DAY OR |\_\_|\_\_| per WEEK

## C4.2. Urine glucose strip?

1. ( ) No
2. ( ) Yes, occasionally (when I feel bad, when I go to the doctor's office, etc.)
3. ( ) Yes, regularly. **C4.2a. How many times do you do the test?** |\_\_|\_\_| per DAY OR |\_\_|\_\_| per WEEK

## C5. In the last 12 months, have you had any glyated (or glycosylated) hemoglobin test?

1. ( ) No
2. ( ) Do not know
3. ( ) Yes. **C5.1. How many times did you take this test in the last 12 months?** |\_\_|\_\_|  
**C5.2. What is the most recent result?** \_\_\_\_\_ |\_\_| Do not know

## C6. In the past 12 months, have you had any other medical visits to control your diabetes (in addition to this visit)?

1. ( ) No
2. ( ) Yes, but not regularly (only when I felt bad or thought diabetes was uncontrolled)
3. ( ) Yes, regularly (regardless of whether I feel well controlled) **C6.1. In this case, how many times?** |\_\_|\_\_|

## C7. In the last 12 months, what type of doctor did you consult for your diabetes? [READ ALL OPTIONS]

1. ( ) I did not see a doctor during this period
2. ( ) General doctor
3. ( ) Endocrinologist or diabetes specialist
4. ( ) Other (specify which: \_\_\_\_\_)

## C8. Generally, do you always consult for diabetes with the same doctor?

1. ( ) No, I consult with the doctor who is available.
2. ( ) Yes, always with the same doctor

## C9. In the last 12 months, where did you go to consult for diabetes? [READ ALL OPTIONS]

1. ( ) I did not consult myself during this period
2. ( ) General public service (not specialized in diabetes)
3. ( ) Diabetes Specialized Public Service (Reference Center)
4. ( ) Private clinic
5. ( ) Other (Which? \_\_\_\_\_)

## C10. Generally, do you always care for your diabetes in the same place / medical service?

1. ( ) No, I consult different medical clinics / services, depending on availability.
2. ( ) Yes, always in the same clinic / medical service.

## C11. In the past 12 months, have you had any hypoglycemia (low blood sugar) episodes that required medical assistance or family / friends / neighbors help?

1. ( ) NO [GO TO C12]
2. ( ) YES **C11.1. How many times?** |\_\_|\_\_|

## C12. In the past 12 months, have you had to go to emergency room because of diabetic ketoacidosis (diabetes decompensation or very high blood sugar)?

1. ( ) NO [GO TO C13]
2. ( ) YES **C12.1. How many times?** |\_\_|\_\_|

## C13a. In the last 12 months, have you participated in any lecture, class or course on diabetes?

1. ( ) NO [GO TO C13b]
2. ( ) YES **C12.1. How many times?** |\_\_|\_\_|

## C13b. Do you participate in any diabetic group or association?

# NATIONAL DIABETES RESEARCH

1. ( ) No, I never participated.  
 2. ( ) Yes, but I do not participate anymore.  
 3. ( ) Yes, I still participate.

**C14. In the last 12 months, you would say that controlling your diabetes has been ... (Answer honestly!)**

|                 |            |                |             |                  |
|-----------------|------------|----------------|-------------|------------------|
| <b>Terrible</b> | <b>Bad</b> | <b>Average</b> | <b>Good</b> | <b>Excellent</b> |
| [ 1 ]           | [ 2 ]      | [ 3 ]          | [ 4 ]       | [ 5 ]            |

**C15. Recently, how much have you found the treatment of your diabetes (medications, control exams, etc.) convenient / practical / easy? (use this scale from 0 to 10 [SHOW SCALE], where "0" means "very inconvenient" and "10" means "very convenient")**

Very inconvenient or impractical **0**  **10** Very convenient or practical

**C16. Recently, how much have you found that treating your diabetes (medications, checkups, etc.) fits your life? (use this scale from 0 to 10 [SHOW SCALE], where "0" means "does not adapt very easily to my life" and "10" means "adapts very easily to my life")**

It does not adapt very easily to my life **0** 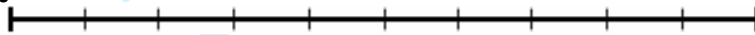 **10** It adapts very easily to my life

**C17. How satisfied are you with what you know about your diabetes? (use this scale from 0 to 10 [SHOW SCALE], where "0" means "very dissatisfied" and "10" means "very satisfied")**

Very dissatisfied or unhappy **0**  **10** Very satisfied or happy

**C18. How satisfied would you be with continuing your current routine of treatment (medications, medications, control tests, etc.)? [READ ALL OPTIONS]**

|                   |              |                                    |           |                |
|-------------------|--------------|------------------------------------|-----------|----------------|
| Very dissatisfied | Dissatisfied | Neither satisfied nor dissatisfied | Satisfied | Very Satisfied |
| [ 1 ]             | [ 2 ]        | [ 3 ]                              | [ 4 ]     | [ 5 ]          |

**THANK YOU FOR YOUR PARTICIPATION!**

STROBE 2007 (v4) Statement—Checklist of items that should be included in reports of *cross-sectional studies*

| Section/Topic                | Item # | Recommendation                                                                                                                                                                       | Reported on page # |
|------------------------------|--------|--------------------------------------------------------------------------------------------------------------------------------------------------------------------------------------|--------------------|
| Title and abstract           | 1      | (a) Indicate the study's design with a commonly used term in the title or the abstract                                                                                               | 1                  |
|                              |        | (b) Provide in the abstract an informative and balanced summary of what was done and what was found                                                                                  | 2                  |
| <b>Introduction</b>          |        |                                                                                                                                                                                      |                    |
| Background/rationale         | 2      | Explain the scientific background and rationale for the investigation being reported                                                                                                 | 4                  |
| Objectives                   | 3      | State specific objectives, including any prespecified hypotheses                                                                                                                     | 5                  |
| <b>Methods</b>               |        |                                                                                                                                                                                      |                    |
| Study design                 | 4      | Present key elements of study design early in the paper                                                                                                                              | 5                  |
| Setting                      | 5      | Describe the setting, locations, and relevant dates, including periods of recruitment, exposure, follow-up, and data collection                                                      | 5,6                |
| Participants                 | 6      | (a) Give the eligibility criteria, and the sources and methods of selection of participants                                                                                          | 6                  |
| Variables                    | 7      | Clearly define all outcomes, exposures, predictors, potential confounders, and effect modifiers. Give diagnostic criteria, if applicable                                             | 6,7,8              |
| Data sources/<br>measurement | 8*     | For each variable of interest, give sources of data and details of methods of assessment (measurement). Describe comparability of assessment methods if there is more than one group | 7,8                |
| Bias                         | 9      | Describe any efforts to address potential sources of bias                                                                                                                            | 6,7                |
| Study size                   | 10     | Explain how the study size was arrived at                                                                                                                                            |                    |
| Quantitative variables       | 11     | Explain how quantitative variables were handled in the analyses. If applicable, describe which groupings were chosen and why                                                         | 6,7                |
| Statistical methods          | 12     | (a) Describe all statistical methods, including those used to control for confounding                                                                                                | 7,8                |
|                              |        | (b) Describe any methods used to examine subgroups and interactions                                                                                                                  | 7,8                |
|                              |        | (c) Explain how missing data were addressed                                                                                                                                          |                    |
|                              |        | (d) If applicable, describe analytical methods taking account of sampling strategy                                                                                                   | 7,8                |
|                              |        | (e) Describe any sensitivity analyses                                                                                                                                                |                    |
| <b>Results</b>               |        |                                                                                                                                                                                      |                    |



|                          |     |                                                                                                                                                                                                                                                                                                                                                                                                               |                    |
|--------------------------|-----|---------------------------------------------------------------------------------------------------------------------------------------------------------------------------------------------------------------------------------------------------------------------------------------------------------------------------------------------------------------------------------------------------------------|--------------------|
| Participants             | 13* | (a) Report numbers of individuals at each stage of study—eg numbers potentially eligible, examined for eligibility, confirmed eligible, included in the study, completing follow-up, and analysed<br>(b) Give reasons for non-participation at each stage<br>(c) Consider use of a flow diagram                                                                                                               | <b>9</b>           |
| Descriptive data         | 14* | (a) Give characteristics of study participants (eg demographic, clinical, social) and information on exposures and potential confounders<br>(b) Indicate number of participants with missing data for each variable of interest                                                                                                                                                                               | <b>9,10</b>        |
| Outcome data             | 15* | Report numbers of outcome events or summary measures                                                                                                                                                                                                                                                                                                                                                          | <b>11,12</b>       |
| Main results             | 16  | (a) Give unadjusted estimates and, if applicable, confounder-adjusted estimates and their precision (eg, 95% confidence interval). Make clear which confounders were adjusted for and why they were included<br>(b) Report category boundaries when continuous variables were categorized<br>(c) If relevant, consider translating estimates of relative risk into absolute risk for a meaningful time period | <b>11,12,13,14</b> |
| Other analyses           | 17  | Report other analyses done—eg analyses of subgroups and interactions, and sensitivity analyses                                                                                                                                                                                                                                                                                                                |                    |
| <b>Discussion</b>        |     |                                                                                                                                                                                                                                                                                                                                                                                                               |                    |
| Key results              | 18  | Summarise key results with reference to study objectives                                                                                                                                                                                                                                                                                                                                                      | <b>16</b>          |
| Limitations              | 19  | Discuss limitations of the study, taking into account sources of potential bias or imprecision. Discuss both direction and magnitude of any potential bias                                                                                                                                                                                                                                                    | <b>18,19</b>       |
| Interpretation           | 20  | Give a cautious overall interpretation of results considering objectives, limitations, multiplicity of analyses, results from similar studies, and other relevant evidence                                                                                                                                                                                                                                    | <b>17,18</b>       |
| Generalisability         | 21  | Discuss the generalisability (external validity) of the study results                                                                                                                                                                                                                                                                                                                                         |                    |
| <b>Other information</b> |     |                                                                                                                                                                                                                                                                                                                                                                                                               |                    |
| Funding                  | 22  | Give the source of funding and the role of the funders for the present study and, if applicable, for the original study on which the present article is based                                                                                                                                                                                                                                                 | <b>21,22</b>       |

\*Give information separately for cases and controls in case-control studies and, if applicable, for exposed and unexposed groups in cohort and cross-sectional studies.

**Note:** An Explanation and Elaboration article discusses each checklist item and gives methodological background and published examples of transparent reporting. The STROBE checklist is best used in conjunction with this article (freely available on the Web sites of PLoS Medicine at <http://www.plosmedicine.org/>, Annals of Internal Medicine at <http://www.annals.org/>, and Epidemiology at <http://www.epidem.com/>). Information on the STROBE Initiative is available at [www.strobe-statement.org](http://www.strobe-statement.org).
